# Supplementary material
Source: publisher figshare collection journal article supplement (https://gsajournals.figshare.com/articles/dataset/_/11771622)
Supplement: Supplementary file 1 [file 1]

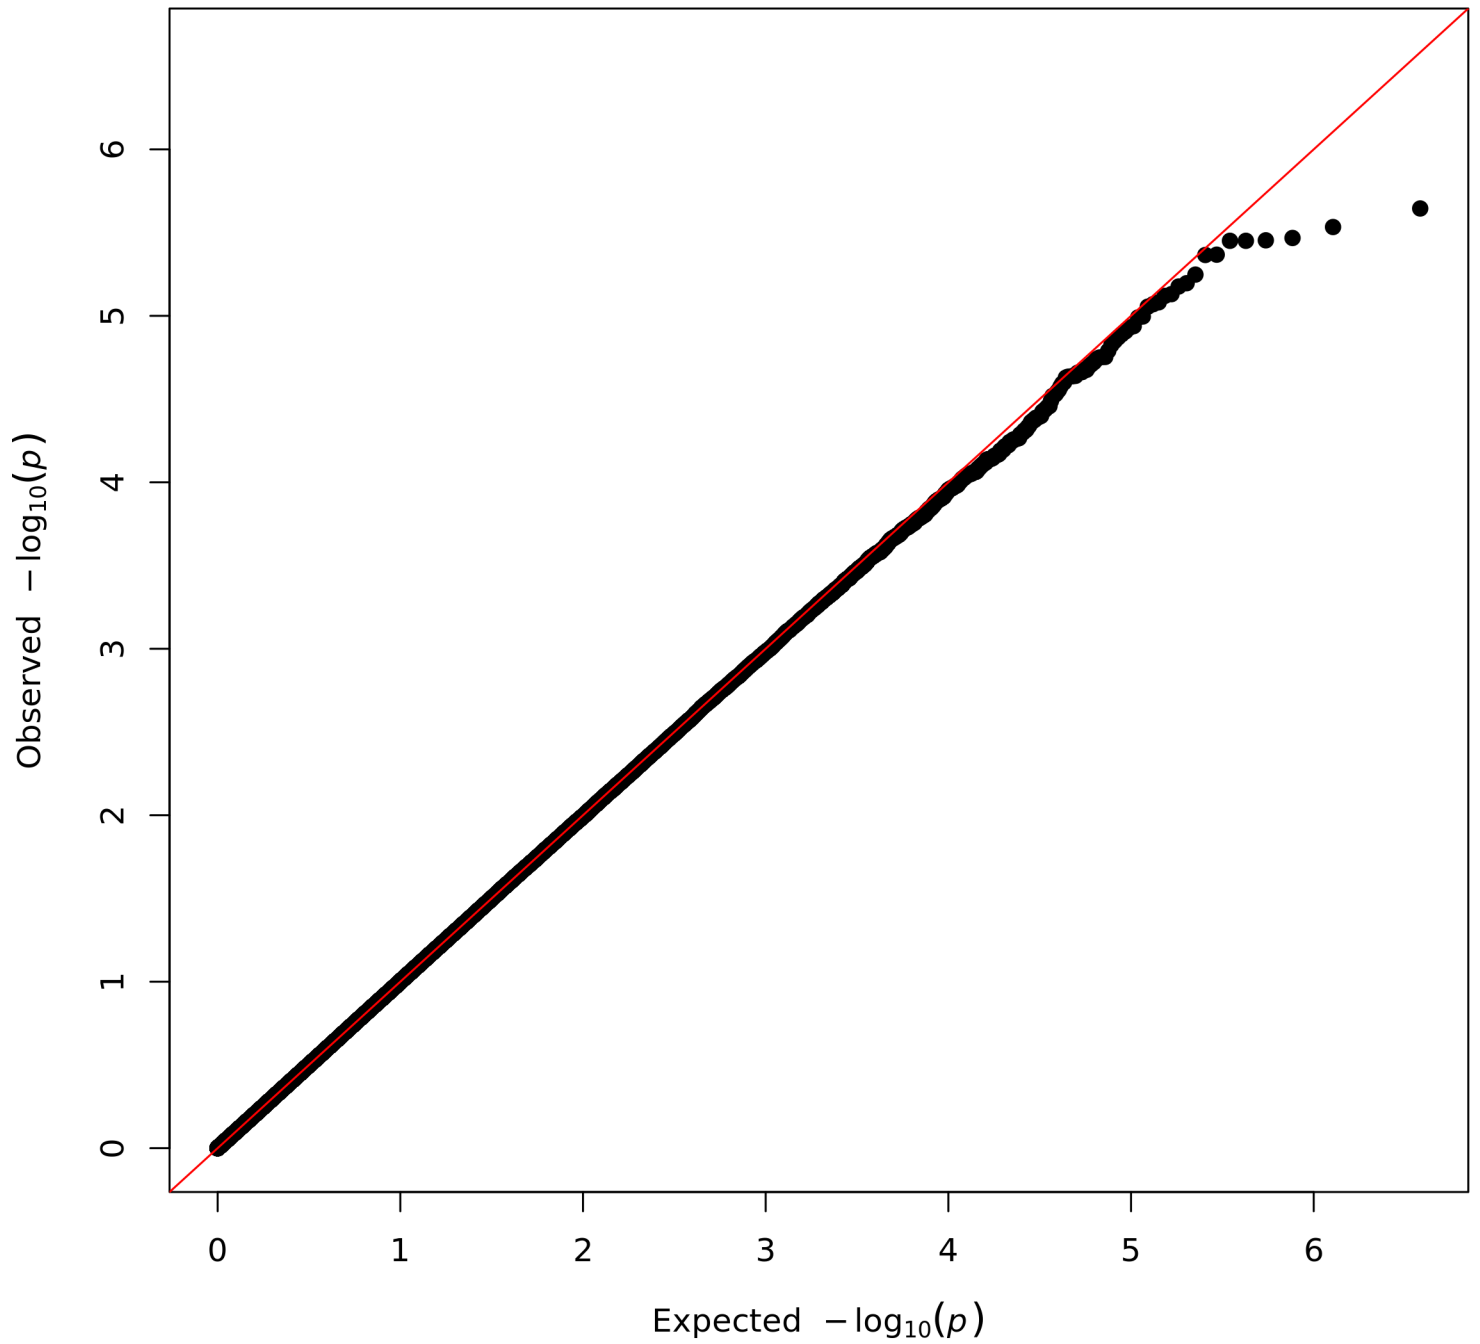

**Figure S2. Q-Q plot for female lethality.** The black dots show the observed  $P$ -values against the  $P$ -values expected under the null hypothesis and the red straight line is the distribution if the observed and expected values are equal.
