# Supplementary material
Source: publisher figshare collection journal article supplement (https://gsajournals.figshare.com/articles/dataset/_/11771622)
Supplement: Supplementary file 1 [file 1]

## Sheet: Sheet1
ID	Gene	p-value	SingleEff	FBgn	GO Term
3L_9341125_SNP	PGRP-LC	2.26e-06	-0.03337	FBgn0035976	integral to membrane
X_19205139_SNP	out	2.93e-06	-0.04221	FBgn0259834	germ cell development
X_16924145_SNP		3.4e-06	-0.03331
X_7778175_SNP	Ir7f	3.52e-06	0.03296	FBgn0259188	integral to membrane
2R_12797506_SNP		3.54e-06	0.06329
2R_12797695_SNP		3.54e-06	0.06329
X_10369817_SNP	CG2889	4.29e-06	0.05965	FBgn0030206	nucleic acid binding
3L_11674242_SNP	CG32085	4.31e-06	-0.03826	FBgn0052085	SCF-dependent proteasomal ubiquitin-dependent protein catabolic process
3L_4164400_SNP	mas	5.65e-06	0.03721	FBgn0011653	plasma membrane
3R_13880982_INS		6.37e-06	0.03441
X_7778295_SNP	Ir7f	6.66e-06	0.03191	FBgn0259188	integral to membrane
2R_15120685_SNP	cora	7.4e-06	0.04023	FBgn0010434	septate junction
3L_4164070_SNP	mas	7.59e-06	0.03398	FBgn0011653	plasma membrane
2L_9131116_SNP	CG32982	8.29e-06	-0.03655	FBgn0052982
2L_13343213_SNP		8.51e-06	0.03383
2R_7047910_SNP	CG13229	8.81e-06	-0.03178	FBgn0033579	G-protein coupled receptor signaling pathway
3L_4598147_SNP	Src64B	1.01e-05	-0.03319	FBgn0262733	protein tyrosine kinase activity
2L_12185274_SNP	bru1	1.02e-05	0.03257	FBgn0000114	oogenesis
2R_5357751_SNP	Camta	1.04e-05	0.08097	FBgn0259234	nucleus
2L_19489287_SNP	CG10194	1.11e-05	0.08053	FBgn0032790	hydrolase activity
3L_9916591_SNP	CG34356	1.15e-05	0.05496	FBgn0085385	molecular_function
2R_7047911_SNP	CG13229	1.18e-05	-0.03144	FBgn0033579	G-protein coupled receptor signaling pathway
3R_9333714_SNP		1.24e-05	0.04662
3L_9989163_SNP	dpr6	1.29e-05	-0.03177	FBgn0040823	sensory perception of chemical stimulus
2R_10501427_SNP	Su(var)2-HP2	1.35e-05	-0.03129	FBgn0026427	gene silencing
X_7616937_SNP	Hira	1.41e-05	-0.06513	FBgn0022786	male germ cell nucleus
3R_15832995_SNP	Hs6st	1.46e-05	-0.07617	FBgn0038755	heparan sulfate proteoglycan biosynthetic process
3R_26405783_SNP	CG9702	1.49e-05	-0.03147	FBgn0039787	secondary active sulfate transmembrane transporter activity
3L_1280422_DEL	CG32333	1.55e-05	0.09235	FBgn0052333	carboxylic ester hydrolase activity
3L_9989014_SNP	dpr6	1.62e-05	-0.03132	FBgn0040823	sensory perception of chemical stimulus
3L_13120363_DEL		1.76e-05	0.04826
3R_20241247_SNP	nAcRalpha-96Aa	1.77e-05	-0.03104	FBgn0000036	acetylcholine-gated channel complex
3R_26405794_SNP	CG9702	1.78e-05	-0.03163	FBgn0039787	secondary active sulfate transmembrane transporter activity
2R_15019768_SNP	botv	1.82e-05	0.05284	FBgn0027535	heparin biosynthetic process
X_3768759_SNP	CG2930	1.9e-05	0.03595	FBgn0028491	membrane
2R_19940685_SNP	ppk29	1.95e-05	-0.03328	FBgn0034965	integral to membrane
3L_11584053_SNP	CG33268	2.01e-05	0.03229	FBgn0036177	cellular_component
2R_12797669_DEL		2.11e-05	0.06038
2R_8576827_SNP	CG30053	2.11e-05	0.03369	FBgn0050053
3L_5607396_SNP		2.18e-05	0.03228
X_16924057_DEL		2.18e-05	-0.03011
3L_13490046_SNP	CG10741	2.2e-05	-0.03151	FBgn0036373	negative regulation of hippo signaling cascade
2R_8338047_SNP	Dyb	2.29e-05	-0.03935	FBgn0033739	dystrobrevin complex
3L_1088841_SNP	bab1	2.3e-05	-0.03022	FBgn0004870	sex differentiation
2R_17775098_SNP	Fili	2.31e-05	0.03294	FBgn0085397	molecular_function
3L_19645823_SNP	tey	2.32e-05	0.03307	FBgn0036899	protein ubiquitination
2L_16547570_SNP	mtgo	2.32e-05	0.03248	FBgn0259735	biological_process
2L_17637571_SNP		2.35e-05	0.05855
2R_12997600_SNP	CG15611	2.51e-05	-0.03123	FBgn0034194	cellular_component
3R_26405760_SNP	CG9702	2.55e-05	-0.03077	FBgn0039787	secondary active sulfate transmembrane transporter activity
X_16516776_INS		2.65e-05	-0.05865
2R_12002589_SNP	Asph	2.78e-05	0.06421	FBgn0034075	peptidyl-amino acid modification
3L_15458250_SNP		2.86e-05	0.03687
3R_20241324_SNP	nAcRalpha-96Aa	2.95e-05	-0.03194	FBgn0000036	acetylcholine-gated channel complex
3L_8633124_SNP	Cpr66D	3e-05	-0.03896	FBgn0052029	structural constituent of cuticle
2R_7047959_SNP	CG13229	3.03e-05	-0.03011	FBgn0033579	G-protein coupled receptor signaling pathway
2R_7973430_SNP	jeb	3.24e-05	0.03066	FBgn0086677	visceral muscle development
3L_826444_SNP	CG13900	3.48e-05	-0.02833	FBgn0035162	nuclear mRNA splicing, via spliceosome
2L_17637551_INS		3.5e-05	0.06355
3R_2801384_SNP	Antp	3.56e-05	0.08851	FBgn0260642	specification of segmental identity, thorax
3R_26404720_SNP	tmod	3.58e-05	-0.0303	FBgn0082582	actin binding
3L_8368263_SNP	ImpE1	3.63e-05	0.07722	FBgn0001253	imaginal disc eversion
3L_7409989_SNP		3.65e-05	0.03236
2L_2995480_SNP	CG3558	3.71e-05	-0.02944	FBgn0025681	biological_process
3L_4598107_SNP	Src64B	3.76e-05	-0.02976	FBgn0262733	protein tyrosine kinase activity
2R_14699510_DEL	CG15096	3.78e-05	0.08332	FBgn0034394	anion transport
3L_15458067_SNP		3.99e-05	0.03693
3L_11551151_SNP	Mob2	4.02e-05	0.03688	FBgn0259481	learning or memory
3L_12678395_SNP		4.06e-05	0.04394
3R_25461292_SNP	DopR2	4.08e-05	0.03741	FBgn0015129
X_12508938_SNP	CG2543	4.1e-05	0.03954	FBgn0030407	tetrahydrofolylpolyglutamate biosynthetic process
2R_19975281_SNP	snama	4.22e-05	0.03065	FBgn0086129	cellular_component
X_17023511_INS	CG5004	4.22e-05	0.03201	FBgn0260748
X_17023510_SNP	CG5004	4.31e-05	0.03205	FBgn0260748
3L_4164430_SNP	mas	4.34e-05	0.03476	FBgn0011653	plasma membrane
3L_12218423_SNP	app	4.49e-05	-0.03541	FBgn0260941	pattern specification process
X_20424104_SNP	RunxB	4.55e-05	0.07085	FBgn0259162	regulation of transcription, DNA-dependent
3L_5308881_SNP		4.61e-05	-0.03154
X_19648359_SNP	Pmp70	4.66e-05	0.04086	FBgn0031069	integral to membrane
2R_12990353_SNP	CG30456	4.82e-05	-0.03912	FBgn0050456	cellular_component
X_6693330_SNP	C3G	4.88e-05	0.04099	FBgn0259228	Ras protein signal transduction
2R_14206776_INS	sbb	4.88e-05	0.0505	FBgn0010575
3R_25378678_SNP		4.88e-05	0.06905
X_7189002_SNP	CG1677	5.01e-05	-0.05697	FBgn0029941	metal ion binding
3L_1170995_SNP	bab2	5.03e-05	0.07534	FBgn0025525	protein binding
3L_1193514_SNP	Trh	5.06e-05	-0.02966	FBgn0035187	iron ion binding
2L_19317672_DEL		5.09e-05	0.08608
X_17023513_SNP	CG5004	5.13e-05	0.03171	FBgn0260748
3L_1040459_SNP	bab1	5.16e-05	-0.02982	FBgn0004870	sex differentiation
3L_20738610_SNP		5.42e-05	-0.03244
X_12222417_SNP	Ten-a	5.44e-05	-0.03029	FBgn0259240
3L_11653205_DEL	CG32085	5.46e-05	-0.03086	FBgn0052085	SCF-dependent proteasomal ubiquitin-dependent protein catabolic process
3R_20241503_SNP	nAcRalpha-96Aa	5.49e-05	-0.03011	FBgn0000036	acetylcholine-gated channel complex
2L_8661063_SNP	Sema-1a	5.5e-05	0.03604	FBgn0011259	integral to membrane
3L_2150167_DEL	zormin	5.52e-05	-0.0313	FBgn0052311	M band
2R_7057797_SNP	CG13229	5.54e-05	-0.05955	FBgn0033579	G-protein coupled receptor signaling pathway
2L_13808090_SNP	CAH1	5.65e-05	-0.03841	FBgn0027844	carbonate dehydratase activity
2R_6138664_SNP	CG12913	5.68e-05	-0.02969	FBgn0033500	acetylgalactosaminyltransferase activity
3R_26299927_SNP	PH4alphaEFB	5.73e-05	-0.04386	FBgn0039776	oxidation-reduction process
X_17023505_SNP	CG5004	5.73e-05	0.03267	FBgn0260748
3L_1487337_DEL	stet	5.96e-05	-0.02895	FBgn0020248	calcium ion binding
3L_12292125_SNP		6e-05	0.0275
2R_17496791_SNP	CG15673	6.04e-05	-0.04723	FBgn0034639
2R_16144574_SNP	Ate1	6.04e-05	-0.03471	FBgn0025720	arginyltransferase activity
3L_4598014_SNP	Src64B	6.07e-05	-0.02921	FBgn0262733	protein tyrosine kinase activity
3R_13415190_SNP		6.14e-05	0.02959
2L_13886638_SNP	cenG1A	6.24e-05	0.09839	FBgn0028509	regulation of GTPase activity
2R_7574421_SNP	Buffy	6.35e-05	0.0666	FBgn0040491	apoptotic process
3L_5607400_SNP		6.35e-05	0.03066
2L_13886629_SNP	cenG1A	6.36e-05	0.09828	FBgn0028509	regulation of GTPase activity
3R_25970257_SNP	AdoR	6.38e-05	-0.02907	FBgn0039747	G-protein coupled receptor signaling pathway
3L_12103548_SNP		6.41e-05	-0.03444
3R_10567761_SNP	jvl	6.44e-05	-0.0318	FBgn0263929	molecular_function
3R_22991340_SNP	CG34293	6.45e-05	0.03712	FBgn0085322	cellular_component
2L_12304928_SNP	bru1	6.72e-05	0.03657	FBgn0000114	oogenesis
2L_17486313_SNP	CG43645	6.78e-05	-0.03334	FBgn0263654	molecular_function
3L_6056020_SNP	CG10472	6.82e-05	0.03298	FBgn0035670	serine-type endopeptidase activity
3R_14316366_SNP	fru	6.82e-05	0.03264	FBgn0004652	male courtship behavior, veined wing vibration
3R_25433491_SNP	alph	6.83e-05	0.08273	FBgn0086361	protein serine/threonine phosphatase activity
2R_9474656_SNP	CG6191	6.87e-05	-0.06019	FBgn0027581	regulation of cell cycle
2L_19447042_SNP	RanGap	6.88e-05	0.04924	FBgn0003346	GTPase activator activity
2R_8486365_SNP	Amph	6.93e-05	0.0557	FBgn0027356	rhabdomere development
3L_9988799_SNP	dpr6	6.95e-05	-0.03345	FBgn0040823	sensory perception of chemical stimulus
3L_12314035_SNP		7.08e-05	0.06131
3L_22513188_SNP		7.16e-05	0.03125
3L_11551149_INS	Mob2	7.18e-05	0.03535	FBgn0259481	learning or memory
2R_17098410_SNP	CG44245	7.22e-05	-0.02915	FBgn0265180	mesoderm development
3L_11672262_SNP	CG32085	7.24e-05	0.03846	FBgn0052085	SCF-dependent proteasomal ubiquitin-dependent protein catabolic process
3L_9916732_SNP	CG34356	7.25e-05	0.04863	FBgn0085385	molecular_function
3L_18661636_SNP	Capr	7.25e-05	0.03103	FBgn0042134	cytoplasm
3L_11672263_SNP	CG32085	7.26e-05	0.03842	FBgn0052085	SCF-dependent proteasomal ubiquitin-dependent protein catabolic process
3L_16907029_SNP	Lmpt	7.28e-05	0.04216	FBgn0261565	zinc ion binding
2R_13793028_SNP	elk	7.31e-05	0.0496	FBgn0011589	voltage-gated potassium channel complex
2R_14208986_SNP	sbb	7.37e-05	0.03386	FBgn0010575
2L_19444759_DEL	Hs2st	7.61e-05	0.06075	FBgn0024230	signal transduction
3L_4164481_SNP	mas	7.62e-05	0.03512	FBgn0011653	plasma membrane
2L_19444754_DEL	Hs2st	7.67e-05	0.05844	FBgn0024230	signal transduction
2L_10357381_SNP	CG5045	7.7e-05	-0.03063	FBgn0032229	proteolysis
3L_18031837_SNP	Eip75B	7.77e-05	-0.0528	FBgn0000568	oogenesis
3L_13613555_SNP	bru-3	7.84e-05	-0.03769	FBgn0264001	mRNA binding
3R_2870919_SNP		7.88e-05	0.05543
2R_6138424_SNP	CG12913	7.95e-05	-0.03064	FBgn0033500	acetylgalactosaminyltransferase activity
3L_3214087_SNP	CG14967	8.05e-05	-0.02818	FBgn0035420	biological_process
X_17023744_SNP	Cg5004	8.07e-05	-0.04285	FBgn0260748
3L_7410564_SNP		8.17e-05	0.03318
2L_19271950_SNP	CR44190	8.17e-05	0.08417	FBgn0265079
2R_6138154_SNP	CG12913	8.27e-05	-0.03043	FBgn0033500	acetylgalactosaminyltransferase activity
3L_11672259_SNP	CG32085	8.28e-05	0.03816	FBgn0052085	SCF-dependent proteasomal ubiquitin-dependent protein catabolic process
3L_3215249_SNP	CG14967	8.32e-05	0.06211	FBgn0035420	biological_process
3R_20241506_SNP	nAcRalpha-96Aa	8.55e-05	-0.02938	FBgn0000036	acetylcholine-gated channel complex
X_13836634_SNP	mamo	8.62e-05	0.04326	FBgn0264981
2R_17707943_SNP	CG13492	8.65e-05	0.03236	FBgn0034662
3L_7949543_SNP		8.66e-05	0.03212
2L_19309457_SNP		8.67e-05	0.08392
2R_20189995_SNP		8.67e-05	-0.03171
2L_18759659_SNP		8.69e-05	0.0514
2R_13792996_SNP	elk	8.7e-05	0.05074	FBgn0011589	voltage-gated potassium channel complex
X_20348626_SNP	RhoGAP19D	8.76e-05	-0.02712	FBgn0031118	cellular_component
2L_19429557_DEL	CG13085	8.77e-05	0.07781	FBgn0032780	SCF ubiquitin ligase complex
3L_1949780_SNP	Cnb	8.81e-05	0.03872	FBgn0035295	molecular_function
X_16895793_SNP	CG9059	8.83e-05	0.03345	FBgn0030810
2L_5455843_SNP		8.85e-05	0.08379
2L_19317533_DEL		8.87e-05	0.07774
2L_19332050_SNP		8.87e-05	0.07774
X_2247278_SNP	ptr	8.89e-05	0.02864	FBgn0003159	cellular_component
3L_9989066_SNP	dpr6	8.9e-05	-0.02868	FBgn0040823	sensory perception of chemical stimulus
X_4468840_SNP	CG32773	8.93e-05	-0.03683	FBgn0052773	molecular_function
3R_26106980_SNP	hdc	8.95e-05	-0.02954	FBgn0010113	instar larval or pupal development
3L_11674164_INS	CG32085	8.95e-05	-0.03534	FBgn0052085	SCF-dependent proteasomal ubiquitin-dependent protein catabolic process
2L_19497038_SNP	swm	8.98e-05	0.08356	FBgn0002044	metal ion binding
2L_17637598_SNP		8.99e-05	0.04868
3R_10563894_INS	eff	9.01e-05	-0.03035	FBgn0011217	protein ubiquitination
3L_9128527_SNP	Dhpr	9.02e-05	0.03506	FBgn0035964	oxidoreductase activity
X_17023502_SNP	CG5004	9.05e-05	0.03091	FBgn0260748
X_7687761_SNP		9.08e-05	-0.03059
2R_19277469_SNP	CG3530	9.17e-05	0.05107	FBgn0028497	protein dephosphorylation
X_10338267_SNP	CG32683	9.24e-05	0.02796	FBgn0052683	signal transduction
3R_14321733_SNP	fru	9.34e-05	0.06048	FBgn0004652	male courtship behavior, veined wing vibration
2R_9146358_SNP	CG10799	9.35e-05	0.07359	FBgn0033821
2R_9413262_SNP	CG13332	9.35e-05	0.03952	FBgn0033851	biological_process
2L_17381037_SNP	Lrch	9.36e-05	-0.02983	FBgn0032633	cleavage furrow
X_8742382_SNP	CG12075	9.47e-05	-0.03602	FBgn0030065
2R_19975211_SNP	snama	9.5e-05	0.0293	FBgn0086129	cellular_component
3R_9328397_SNP		9.51e-05	0.0293
2L_16544546_SNP	mtgo	9.64e-05	0.02888	FBgn0259735	biological_process
3L_15230927_SNP	Tollo	9.66e-05	0.02997	FBgn0029114	signal transduction
2L_19079032_SNP	CG10700	9.73e-05	0.0778	FBgn0032754	oxidation-reduction process
3L_9460943_SNP	CG32043	9.74e-05	0.07254	FBgn0052043
X_10338264_SNP	CG32683	9.76e-05	0.02787	FBgn0052683	signal transduction
3R_13975300_SNP		9.85e-05	-0.03384
3L_11528798_SNP	Mob2	9.92e-05	-0.03185	FBgn0259481	learning or memory
3R_15957328_SNP		9.99e-05	0.04383
