# Supplementary material
Source: publisher figshare collection journal article supplement (https://gsajournals.figshare.com/articles/dataset/_/11771622)
Supplement: Supplementary file 2 [file 1]

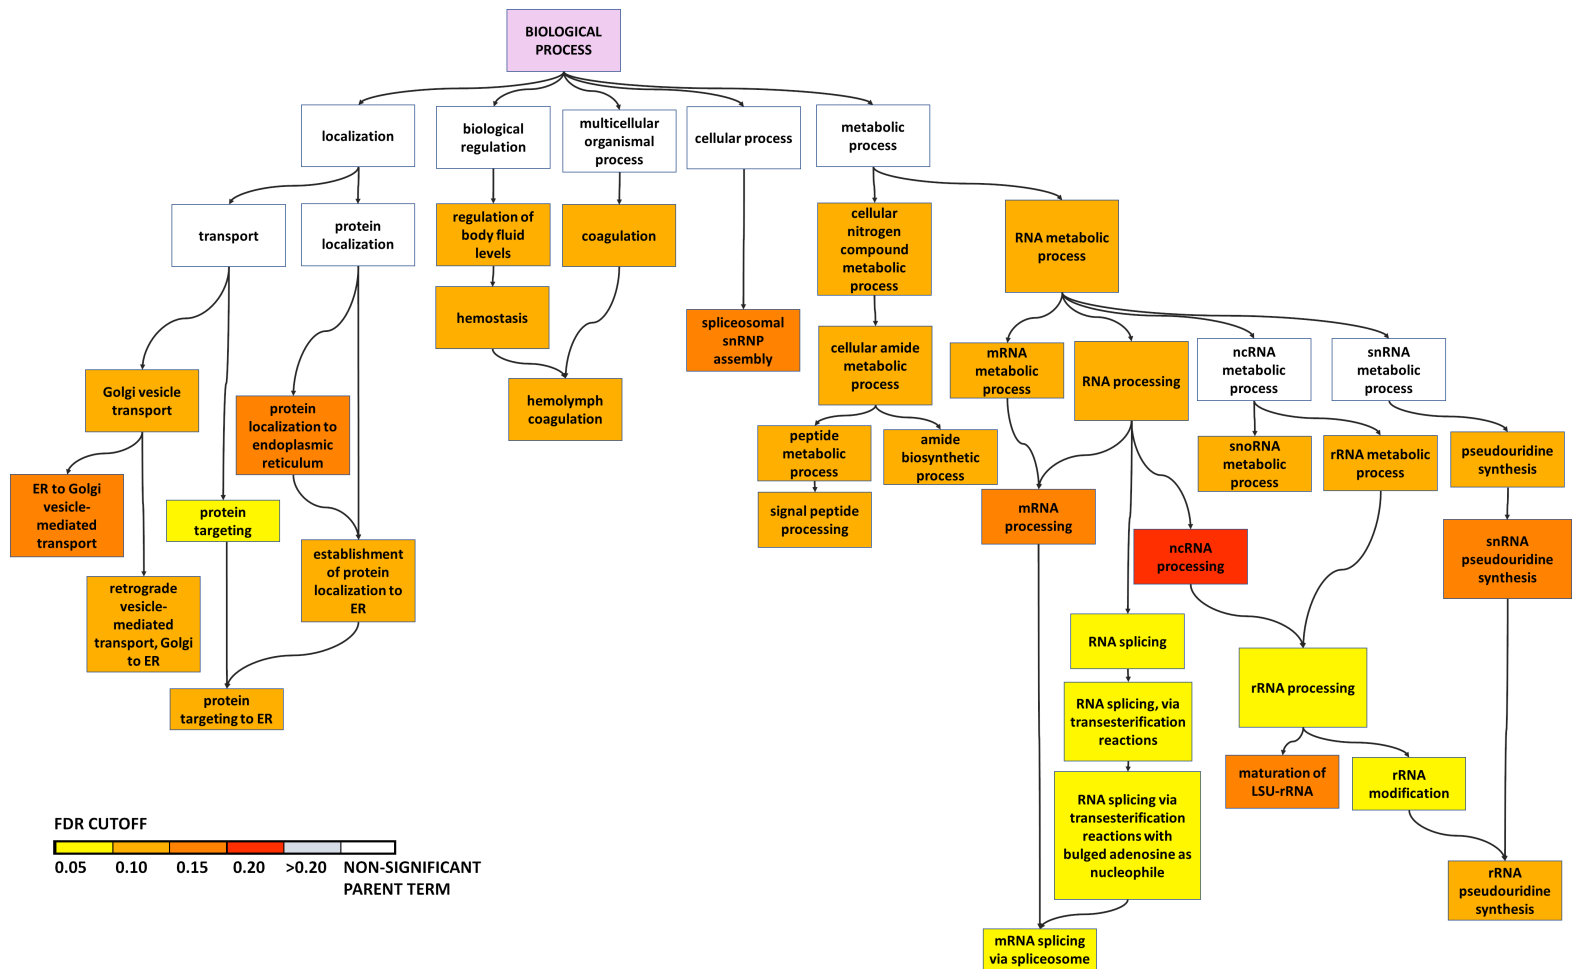

**Figure S5. Genes upregulated in the low female lethality lines.** Gene Ontology (GO) term enrichment results from the differential gene expression analysis of the high female lethality lines versus the low female lethality lines. Color shading indicates the term had a Benjamini-Hochberg false discovery rate (FDR) equal to or less than the matching color displayed in the FDR cutoff legend.
