# Supplementary material
Source: publisher figshare collection journal article supplement (https://gsajournals.figshare.com/articles/dataset/_/11771622)
Supplement: Supplementary file 3 [file 1]

**Supplementary Table 1** Average female lethality values corresponding to Figure 1. Cross results are presented in the order as depicted in Figure 1, with the exception of Canton S-B, which is not present in the figure. All values are averaged between 2 replicates for each cross.

| <b>Cross to</b> | <b>Avg % Female Lethality</b> | <b>Avg % Female Offspring</b> | <b>Avg % Male Offspring</b> |
|-----------------|-------------------------------|-------------------------------|-----------------------------|
| Canton S-B      | 84.7981                       | 13.1910                       | 86.8090                     |
| 911H            | 96.9835                       | 2.9279                        | 97.0721                     |
| 153H            | 96.9379                       | 2.9707                        | 97.0293                     |
| 195H            | 96.4179                       | 3.4559                        | 96.5441                     |
| 843             | 93.8445                       | 5.7416                        | 94.2584                     |
| 399H            | 93.4917                       | 6.1052                        | 93.8948                     |
| 884H            | 92.8151                       | 6.6575                        | 93.3425                     |
| 338             | 92.1719                       | 7.1922                        | 92.8078                     |
| 377             | 91.7481                       | 7.6108                        | 92.3892                     |
| 280             | 91.6765                       | 7.6697                        | 92.3303                     |
| 441             | 91.3337                       | 7.9393                        | 92.0607                     |
| 359             | 89.9189                       | 9.1557                        | 90.8443                     |
| 882H            | 89.5436                       | 9.4666                        | 90.5334                     |
| 392             | 89.4439                       | 9.5268                        | 90.4732                     |
| 355             | 89.4128                       | 9.5628                        | 90.4372                     |
| 88H             | 88.9011                       | 9.8800                        | 90.1200                     |
| 237             | 88.5602                       | 10.1503                       | 89.8497                     |
| 356             | 87.6106                       | 10.9530                       | 89.0470                     |
| 853             | 87.4526                       | 10.9937                       | 89.0063                     |
| 892             | 87.3930                       | 10.4864                       | 89.5136                     |
| 109             | 86.8450                       | 11.6090                       | 88.3910                     |
| 440             | 86.0161                       | 12.2683                       | 87.7317                     |
| 49              | 85.7528                       | 12.4600                       | 87.5400                     |
| 223             | 85.7507                       | 12.1387                       | 87.8613                     |
| 395             | 85.6046                       | 12.5749                       | 87.4251                     |
| 158             | 85.5714                       | 12.5307                       | 87.4693                     |
| 177             | 85.3141                       | 12.7920                       | 87.2080                     |
| 335             | 85.3041                       | 12.7095                       | 87.2905                     |
| 405             | 85.2989                       | 12.6474                       | 87.3526                     |
| 563             | 84.5564                       | 13.2851                       | 86.7149                     |
| 85              | 84.1747                       | 13.6349                       | 86.3651                     |
| 357             | 83.3209                       | 14.2185                       | 85.7815                     |
| 897             | 83.1468                       | 14.1446                       | 85.8554                     |
| 374             | 83.1280                       | 14.2954                       | 85.7046                     |
| 761             | 82.5348                       | 14.8628                       | 85.1372                     |
| 907             | 82.4243                       | 14.9454                       | 85.0546                     |
| 301             | 82.1644                       | 15.0211                       | 84.9789                     |
| 373             | 81.7688                       | 15.0370                       | 84.9630                     |
| 517             | 81.5162                       | 15.3923                       | 84.6077                     |
| 427             | 80.5312                       | 16.2949                       | 83.7051                     |
| 913             | 80.4473                       | 15.9697                       | 84.0303                     |
| 855             | 79.9389                       | 16.7055                       | 83.2945                     |
| 802             | 79.7594                       | 16.8262                       | 83.1738                     |

|     |         |         |         |
|-----|---------|---------|---------|
| 439 | 79.6792 | 16.7249 | 83.2751 |
| 443 | 78.9925 | 17.3603 | 82.6397 |
| 100 | 78.5568 | 17.6479 | 82.3521 |
| 894 | 78.4040 | 17.7351 | 82.2649 |
| 774 | 77.9954 | 17.2531 | 82.7469 |
| 229 | 77.7937 | 18.1571 | 81.8429 |
| 900 | 77.7118 | 18.2228 | 81.7772 |
| 589 | 77.6773 | 18.0573 | 81.9427 |
| 129 | 77.6144 | 18.2243 | 81.7757 |
| 38  | 77.4296 | 18.4097 | 81.5903 |
| 310 | 76.6865 | 18.8930 | 81.1070 |
| 59  | 75.4313 | 19.6429 | 80.3571 |
| 358 | 75.3701 | 19.7596 | 80.2404 |
| 385 | 74.7571 | 20.1057 | 79.8943 |
| 535 | 74.2709 | 19.8489 | 80.1511 |
| 360 | 74.2377 | 20.4778 | 79.5222 |
| 386 | 73.7442 | 20.7655 | 79.2345 |
| 890 | 73.5883 | 20.7844 | 79.2156 |
| 530 | 73.1425 | 21.0517 | 78.9483 |
| 787 | 72.9437 | 21.2433 | 78.7567 |
| 852 | 72.9221 | 21.2701 | 78.7299 |
| 75  | 72.9173 | 20.2027 | 79.7973 |
| 336 | 72.5978 | 21.5007 | 78.4993 |
| 861 | 72.4776 | 21.5699 | 78.4301 |
| 491 | 72.2343 | 21.0836 | 78.9164 |
| 627 | 72.2222 | 20.4904 | 79.5096 |
| 45  | 72.2162 | 21.7014 | 78.2986 |
| 375 | 71.9401 | 21.9090 | 78.0910 |
| 383 | 71.6786 | 21.8869 | 78.1131 |
| 181 | 71.5758 | 22.0550 | 77.9450 |
| 256 | 71.5386 | 22.1420 | 77.8580 |
| 397 | 71.4031 | 22.1818 | 77.8182 |
| 93  | 71.3106 | 21.8650 | 78.1350 |
| 796 | 71.1330 | 22.3980 | 77.6020 |
| 406 | 71.0915 | 20.9881 | 79.0119 |
| 714 | 70.9040 | 22.4548 | 77.5452 |
| 707 | 70.7386 | 22.5892 | 77.4108 |
| 887 | 70.3666 | 22.8349 | 77.1651 |
| 208 | 68.8419 | 23.3723 | 76.6277 |
| 879 | 68.5739 | 23.9068 | 76.0932 |
| 857 | 68.3710 | 24.0272 | 75.9728 |
| 804 | 67.7837 | 24.3651 | 75.6349 |
| 738 | 67.5777 | 23.9058 | 76.0942 |
| 502 | 67.4200 | 24.5688 | 75.4312 |
| 340 | 67.0341 | 24.6761 | 75.3239 |
| 176 | 67.0064 | 24.5946 | 75.4054 |
| 850 | 66.9772 | 24.7154 | 75.2846 |
| 361 | 66.6237 | 24.4228 | 75.5772 |
| 42  | 66.2052 | 25.2584 | 74.7416 |

|     |         |         |         |
|-----|---------|---------|---------|
| 426 | 65.8825 | 25.4267 | 74.5733 |
| 303 | 65.8404 | 25.2305 | 74.7695 |
| 48  | 65.7561 | 25.4487 | 74.5513 |
| 379 | 65.5761 | 25.5885 | 74.4115 |
| 712 | 65.4859 | 25.2926 | 74.7074 |
| 821 | 65.2120 | 25.7598 | 74.2402 |
| 31  | 64.8693 | 25.6966 | 74.3034 |
| 309 | 64.8123 | 26.0022 | 73.9978 |
| 732 | 64.7205 | 26.0091 | 73.9909 |
| 513 | 64.5517 | 25.2448 | 74.7552 |
| 371 | 63.6461 | 26.5518 | 73.4482 |
| 319 | 63.2784 | 26.5978 | 73.4022 |
| 69  | 63.1824 | 25.8406 | 74.1594 |
| 161 | 63.1067 | 26.8454 | 73.1546 |
| 737 | 63.0605 | 26.9707 | 73.0293 |
| 217 | 61.8118 | 27.6349 | 72.3651 |
| 91  | 61.6732 | 27.4832 | 72.5168 |
| 57  | 60.3518 | 28.2507 | 71.7493 |
| 228 | 59.9934 | 28.4649 | 71.5351 |
| 32  | 59.0817 | 28.8253 | 71.1747 |
| 370 | 58.8639 | 28.9678 | 71.0322 |
| 820 | 58.2792 | 29.3033 | 70.6967 |
| 805 | 58.1720 | 28.4688 | 71.5312 |
| 595 | 58.1289 | 28.8670 | 71.1330 |
| 551 | 57.9151 | 29.4378 | 70.5622 |
| 721 | 57.6721 | 29.4951 | 70.5049 |
| 716 | 57.2752 | 29.3580 | 70.6420 |
| 765 | 57.1260 | 29.7565 | 70.2435 |
| 101 | 56.8910 | 30.0978 | 69.9022 |
| 73  | 56.6893 | 29.8706 | 70.1294 |
| 320 | 56.6202 | 30.2542 | 69.7458 |
| 354 | 56.4912 | 29.9658 | 70.0342 |
| 26  | 56.2294 | 30.4017 | 69.5983 |
| 348 | 55.7059 | 30.6514 | 69.3486 |
| 189 | 54.9663 | 31.0433 | 68.9567 |
| 105 | 54.2837 | 31.2770 | 68.7230 |
| 748 | 54.1106 | 31.3550 | 68.6450 |
| 786 | 53.9334 | 31.5291 | 68.4709 |
| 642 | 53.8003 | 31.5305 | 68.4695 |
| 849 | 53.4198 | 31.5188 | 68.4812 |
| 409 | 53.3247 | 30.8982 | 69.1018 |
| 908 | 52.5760 | 32.1621 | 67.8379 |
| 380 | 51.0647 | 32.8022 | 67.1978 |
| 584 | 50.9987 | 32.8307 | 67.1693 |
| 318 | 50.8340 | 32.9364 | 67.0636 |
| 324 | 50.2776 | 33.1097 | 66.8903 |
| 508 | 49.1912 | 33.3863 | 66.6137 |
| 233 | 48.5049 | 33.9873 | 66.0127 |
| 705 | 48.3155 | 34.0552 | 65.9448 |

|      |         |         |         |
|------|---------|---------|---------|
| 822  | 48.1203 | 34.0793 | 65.9207 |
| 808  | 48.1016 | 32.6481 | 67.3519 |
| 315  | 47.9892 | 34.0619 | 65.9381 |
| 381  | 47.7143 | 34.1111 | 65.8889 |
| 307  | 47.6742 | 34.3496 | 65.6504 |
| 391  | 47.6405 | 34.1777 | 65.8223 |
| 505  | 47.2252 | 34.4673 | 65.5327 |
| 859  | 47.0940 | 34.4167 | 65.5833 |
| 783  | 47.0378 | 34.5487 | 65.4513 |
| 703  | 46.5008 | 34.0116 | 65.9884 |
| 630  | 46.4117 | 34.8693 | 65.1307 |
| 239  | 46.0267 | 35.0525 | 64.9475 |
| 235  | 45.7967 | 34.6189 | 65.3811 |
| 776  | 45.7539 | 34.8622 | 65.1378 |
| 149  | 45.6329 | 35.1381 | 64.8619 |
| 528  | 45.6163 | 35.2132 | 64.7868 |
| 287  | 44.5704 | 35.6155 | 64.3845 |
| 138  | 44.2665 | 35.5102 | 64.4898 |
| 227  | 44.2460 | 35.6853 | 64.3147 |
| 790  | 44.0816 | 35.8405 | 64.1595 |
| 332  | 43.9126 | 35.7944 | 64.2056 |
| 41L  | 42.2815 | 36.5814 | 63.4186 |
| 730  | 42.2499 | 36.5925 | 63.4075 |
| 596  | 42.1393 | 36.6316 | 63.3684 |
| 321  | 42.1289 | 36.6571 | 63.3429 |
| 559  | 42.1039 | 36.6374 | 63.3626 |
| 142  | 41.2785 | 36.9570 | 63.0430 |
| 21   | 41.0165 | 37.0435 | 62.9565 |
| 832  | 40.9591 | 37.0758 | 62.9242 |
| 304  | 40.8488 | 36.5845 | 63.4155 |
| 136L | 40.4382 | 36.4176 | 63.5824 |
| 639  | 39.2962 | 37.4430 | 62.5570 |
| 555  | 39.1217 | 37.8129 | 62.1871 |
| 801  | 38.6659 | 37.3726 | 62.6274 |
| 306  | 37.5495 | 38.1374 | 61.8626 |
| 365L | 36.9323 | 38.6744 | 61.3256 |
| 28   | 36.1847 | 38.9546 | 61.0454 |
| 40   | 35.6801 | 39.1227 | 60.8773 |
| 461  | 35.5144 | 39.0628 | 60.9372 |
| 799  | 35.4582 | 39.1881 | 60.8119 |
| 437  | 35.3753 | 39.2442 | 60.7558 |
| 486  | 34.4668 | 38.8899 | 61.1101 |
| 531  | 32.7224 | 40.1008 | 59.8992 |
| 566  | 32.3163 | 40.3140 | 59.6860 |
| 390  | 32.0460 | 40.4498 | 59.5502 |
| 362  | 31.1725 | 40.4374 | 59.5626 |
| 810  | 30.8949 | 40.8469 | 59.1531 |
| 634  | 29.7147 | 41.1041 | 58.8959 |
| 367  | 28.6812 | 41.5105 | 58.4895 |

|      |         |         |         |
|------|---------|---------|---------|
| 727  | 25.8929 | 41.9739 | 58.0261 |
| 317L | 25.2413 | 42.7781 | 57.2219 |
| 83   | 24.9133 | 42.4582 | 57.5418 |
| 646L | 23.6888 | 43.2614 | 56.7386 |
| 313  | 23.4044 | 43.2852 | 56.7148 |
| 819  | 23.0382 | 43.4859 | 56.5141 |
| 837  | 22.9684 | 43.3910 | 56.6090 |
| 757  | 22.0818 | 43.7345 | 56.2655 |
| 352L | 20.4073 | 44.1789 | 55.8211 |
| 350L | 18.1322 | 44.9329 | 55.0671 |
| 382  | 14.4231 | 47.3646 | 52.6354 |
| 492L | 10.9428 | 47.0541 | 52.9459 |
