# Supplementary material
Source: publisher figshare collection journal article supplement (https://gsajournals.figshare.com/articles/dataset/_/11771622)
Supplement: Supplementary file 5 [file 1]

Table S9: Average RPKM values with associated standard error values for high and low lethality lines of *Drosophila melanogaster* as displayed in the figure 7 heatmap.

| Gene          | FB accession* | High lethality lines |                |                |                | Low lethality lines |                |               |               |
|---------------|---------------|----------------------|----------------|----------------|----------------|---------------------|----------------|---------------|---------------|
|               |               |                      |                |                |                | Low tTA             |                | High tTA      |               |
|               |               | 153H                 | 195H           | 399H           | 911H           | 350L                | 492L           | 317L          | 646L          |
| lea           | FBgn0002543   | 5.08 ± 0.43          | 5.27 ± 1.15    | 4.99 ± 1.23    | 6.35 ± 0.57    | 5.64 ± 0.43         | 5.31 ± 1.14    | 5.58 ± 0.56   | 6.92 ± 0.53   |
| shf           | FBgn0003390   | 7.64 ± 0.77          | 6.57 ± 0.96    | 7.34 ± 0.80    | 10.59 ± 0.07   | 8.52 ± 0.91         | 7.19 ± 1.95    | 7.78 ± 0.83   | 9.53 ± 0.59   |
| robo3         | FBgn0041097   | 2.53 ± 0.40          | 2.41 ± 0.21    | 2.69 ± 0.51    | 3.63 ± 0.25    | 2.88 ± 0.20         | 2.28 ± 0.55    | 2.71 ± 0.56   | 3.22 ± 0.44   |
| pbl           | FBgn0003041   | 14.98 ± 1.70         | 13.22 ± 1.19   | 12.96 ± 4.25   | 14.09 ± 0.80   | 13.29 ± 0.47        | 12.11 ± 1.07   | 12.98 ± 1.02  | 36.42 ± 1.77  |
| Nrt           | FBgn0004108   | 12.20 ± 1.58         | 10.96 ± 2.31   | 11.60 ± 2.74   | 17.39 ± 0.33   | 12.78 ± 0.90        | 10.50 ± 2.70   | 13.21 ± 2.89  | 16.37 ± 1.49  |
| Npc2a         | FBgn0031381   | 113.08 ± 16.99       | 102.40 ± 20.45 | 110.91 ± 12.66 | 154.18 ± 10.24 | 132.46 ± 7.10       | 116.35 ± 21.46 | 105.42 ± 9.34 | 146.17 ± 5.80 |
| Dscam4        | FBgn0263219   | 1.69 ± 0.47          | 1.53 ± 0.24    | 1.41 ± 0.52    | 2.61 ± 0.13    | 1.97 ± 0.16         | 1.57 ± 0.49    | 1.89 ± 0.59   | 2.50 ± 0.36   |
| Abl           | FBgn0000017   | 7.24 ± 0.91          | 7.47 ± 1.40    | 6.99 ± 0.84    | 8.57 ± 0.41    | 7.99 ± 0.41         | 7.19 ± 1.41    | 8.63 ± 0.95   | 10.04 ± 0.56  |
| tsu           | FBgn0033378   | 43.20 ± 2.54         | 42.42 ± 0.72   | 52.01 ± 2.03   | 51.64 ± 0.90   | 51.55 ± 2.95        | 48.37 ± 2.75   | 44.77 ± 4.86  | 54.34 ± 2.10  |
| CG5147        | FBgn0036775   | 9.07 ± 0.49          | 7.81 ± 0.24    | 8.98 ± 1.16    | 11.08 ± 0.46   | 9.41 ± 0.94         | 9.84 ± 1.64    | 9.38 ± 1.26   | 10.23 ± 0.72  |
| TfIIA-S       | FBgn0013347   | 61.66 ± 4.72         | 62.32 ± 4.04   | 64.51 ± 4.32   | 74.61 ± 2.66   | 69.57 ± 2.60        | 66.53 ± 10.66  | 66.50 ± 6.79  | 69.83 ± 4.53  |
| Taf10         | FBgn0028398   | 29.77 ± 1.18         | 26.18 ± 1.66   | 35.71 ± 0.81   | 36.21 ± 2.79   | 35.17 ± 1.88        | 32.22 ± 1.63   | 29.13 ± 2.61  | 36.44 ± 0.94  |
| Smn           | FBgn0036641   | 14.70 ± 1.56         | 13.27 ± 1.10   | 15.28 ± 0.62   | 21.39 ± 0.58   | 16.89 ± 0.76        | 17.27 ± 3.21   | 16.24 ± 4.22  | 18.66 ± 1.49  |
| SmD3          | FBgn0023167   | 47.06 ± 5.10         | 46.60 ± 4.39   | 55.11 ± 3.31   | 59.14 ± 1.56   | 48.65 ± 5.19        | 50.31 ± 7.84   | 52.28 ± 5.92  | 55.39 ± 3.36  |
| SmD1          | FBgn0261933   | 26.01 ± 2.38         | 25.39 ± 1.86   | 27.91 ± 1.73   | 29.39 ± 1.49   | 27.47 ± 2.46        | 29.35 ± 2.10   | 26.49 ± 3.43  | 32.35 ± 1.89  |
| Rpb5          | FBgn0033571   | 19.17 ± 1.07         | 17.72 ± 1.45   | 20.89 ± 2.08   | 21.83 ± 2.06   | 21.31 ± 0.33        | 20.67 ± 1.63   | 18.24 ± 2.40  | 28.17 ± 1.20  |
| Ref1          | FBgn0010774   | 66.57 ± 5.48         | 63.26 ± 3.41   | 70.46 ± 3.08   | 76.28 ± 0.80   | 70.18 ± 4.44        | 71.04 ± 8.77   | 71.34 ± 6.64  | 77.54 ± 3.97  |
| NHP2          | FBgn0029148   | 31.49 ± 1.75         | 38.38 ± 0.61   | 44.45 ± 4.84   | 44.56 ± 2.45   | 40.15 ± 3.40        | 42.61 ± 3.26   | 35.45 ± 7.59  | 46.68 ± 1.93  |
| hoip          | FBgn0015393   | 47.95 ± 1.41         | 54.72 ± 2.33   | 64.70 ± 7.06   | 62.54 ± 5.88   | 57.23 ± 1.49        | 60.16 ± 2.24   | 51.26 ± 9.55  | 72.61 ± 2.69  |
| CG6724        | FBgn0032298   | 7.48 ± 0.34          | 7.18 ± 0.36    | 8.91 ± 0.76    | 8.67 ± 0.30    | 8.10 ± 0.33         | 8.46 ± 0.59    | 7.11 ± 1.52   | 9.64 ± 0.56   |
| CG4038        | FBgn0011824   | 27.92 ± 2.81         | 28.65 ± 1.36   | 36.48 ± 2.56   | 36.01 ± 1.79   | 32.72 ± 1.35        | 36.13 ± 0.91   | 29.02 ± 5.92  | 40.65 ± 2.57  |
| caz           | FBgn0285954   | 43.97 ± 4.22         | 41.78 ± 4.20   | 51.02 ± 1.28   | 55.36 ± 3.23   | 48.92 ± 3.38        | 50.94 ± 6.80   | 46.63 ± 4.30  | 53.94 ± 7.37  |
| Bin1          | FBgn0024491   | 24.15 ± 1.81         | 21.30 ± 2.02   | 25.74 ± 1.96   | 26.58 ± 1.44   | 28.09 ± 0.62        | 26.17 ± 2.81   | 26.49 ± 2.53  | 29.70 ± 1.42  |
| nudE          | FBgn0036059   | 42.01 ± 3.79         | 37.74 ± 2.61   | 29.75 ± 0.87   | 34.42 ± 1.37   | 38.82 ± 0.60        | 32.11 ± 3.99   | 37.06 ± 1.10  | 29.35 ± 3.82  |
| l(2)gl        | FBgn0002121   | 52.03 ± 5.10         | 48.69 ± 4.79   | 35.50 ± 3.37   | 38.10 ± 2.07   | 39.22 ± 3.76        | 38.04 ± 2.64   | 45.92 ± 1.64  | 34.08 ± 2.77  |
| gcl           | FBgn0005695   | 9.43 ± 1.20          | 7.56 ± 0.71    | 7.07 ± 0.91    | 6.83 ± 0.30    | 8.70 ± 0.77         | 7.03 ± 0.70    | 9.30 ± 0.30   | 7.39 ± 0.75   |
| egl           | FBgn0000562   | 22.28 ± 1.68         | 19.37 ± 1.76   | 18.81 ± 1.30   | 17.27 ± 0.42   | 20.71 ± 0.55        | 17.80 ± 0.96   | 20.35 ± 0.70  | 16.37 ± 0.73  |
| AGO2          | FBgn0087035   | 60.65 ± 6.62         | 61.60 ± 7.02   | 54.52 ± 3.02   | 49.18 ± 2.47   | 64.57 ± 1.27        | 57.14 ± 7.64   | 51.97 ± 1.97  | 51.05 ± 4.84  |
| Tob           | FBgn0028397   | 4.60 ± 0.56          | 7.14 ± 0.30    | 3.57 ± 0.33    | 3.86 ± 0.36    | 3.65 ± 0.52         | 3.13 ± 0.55    | 3.92 ± 0.42   | 2.52 ± 0.21   |
| NtR           | FBgn0029147   | 9.26 ± 0.81          | 8.94 ± 0.78    | 6.94 ± 0.60    | 6.18 ± 1.63    | 7.55 ± 1.84         | 5.66 ± 1.25    | 6.69 ± 0.58   | 4.24 ± 1.90   |
| Npc1b         | FBgn0261675   | 3.83 ± 1.03          | 5.54 ± 2.31    | 4.12 ± 0.46    | 1.55 ± 2.20    | 4.49 ± 1.02         | 3.22 ± 1.16    | 3.66 ± 0.43   | 2.25 ± 1.11   |
| Neurochondrin | FBgn0037447   | 100.28 ± 7.31        | 86.92 ± 6.36   | 82.48 ± 4.15   | 75.47 ± 0.40   | 93.20 ± 4.23        | 87.41 ± 6.82   | 83.02 ± 4.13  | 76.46 ± 2.72  |
| mew           | FBgn0004456   | 11.06 ± 1.15         | 12.97 ± 1.52   | 10.27 ± 0.45   | 9.61 ± 0.09    | 12.02 ± 0.57        | 10.53 ± 0.61   | 11.72 ± 0.45  | 9.54 ± 0.84   |
| Klp64D        | FBgn0004380   | 13.33 ± 0.92         | 12.25 ± 0.48   | 12.33 ± 0.53   | 12.39 ± 0.48   | 14.90 ± 0.66        | 12.79 ± 1.32   | 13.59 ± 0.53  | 10.45 ± 1.40  |
| ine           | FBgn0011603   | 19.13 ± 2.23         | 18.23 ± 4.27   | 13.66 ± 1.46   | 12.37 ± 2.09   | 15.73 ± 1.76        | 14.78 ± 3.31   | 16.49 ± 2.15  | 10.31 ± 1.17  |
| dia           | FBgn0011202   | 19.91 ± 1.54         | 18.05 ± 1.57   | 13.93 ± 1.82   | 14.66 ± 0.72   | 16.30 ± 1.06        | 15.00 ± 0.93   | 17.34 ± 0.70  | 13.99 ± 1.13  |
| ck            | FBgn0000317   | 5.31 ± 0.17          | 5.89 ± 0.49    | 5.20 ± 0.71    | 4.16 ± 0.31    | 5.02 ± 0.30         | 5.12 ± 0.25    | 6.40 ± 0.22   | 5.11 ± 0.14   |
| chico         | FBgn0024248   | 14.58 ± 2.55         | 12.91 ± 1.81   | 10.93 ± 0.88   | 12.25 ± 0.35   | 13.56 ± 0.79        | 10.70 ± 0.98   | 13.77 ± 0.47  | 10.22 ± 0.76  |
| CG8086        | FBgn0032010   | 13.23 ± 1.70         | 12.23 ± 0.96   | 12.60 ± 0.53   | 9.59 ± 0.73    | 14.12 ± 1.19        | 13.53 ± 0.98   | 11.71 ± 0.74  | 10.33 ± 0.44  |
| CG15254       | FBgn0028949   | 30.86 ± 10.88        | 17.20 ± 8.18   | 34.02 ± 0.78   | 9.41 ± 10.74   | 38.55 ± 10.65       | 5.46 ± 2.07    | 39.55 ± 2.28  | 6.56 ± 4.04   |
| CAP           | FBgn0033504   | 63.64 ± 4.34         | 72.10 ± 8.65   | 62.80 ± 4.92   | 57.84 ± 1.38   | 69.05 ± 2.31        | 55.41 ± 4.23   | 66.68 ± 2.54  | 50.96 ± 3.55  |
| aru           | FBgn0029095   | 14.34 ± 1.72         | 11.58 ± 1.24   | 11.17 ± 0.69   | 10.52 ± 1.16   | 14.61 ± 0.82        | 11.19 ± 0.99   | 13.47 ± 0.48  | 10.72 ± 1.39  |

\*Flybase *Drosophila melanogaster* Canton-S genome version dm6.15\_FB2017\_02
