# Supplementary material
Source: publisher figshare collection journal article supplement (https://gsajournals.figshare.com/articles/dataset/_/11771622)
Supplement: Supplementary file 6 [file 1]

Table S6. Pairwise comparisons of high female lethal/high tTA, low lethal/high tTA and low lethal/low tTA DGRP crosses

| measurement                | High/high         | Low/high           | Low/low           | HSD  | <i>p</i> -value<br>(from F-<br>test) | d.f. |
|----------------------------|-------------------|--------------------|-------------------|------|--------------------------------------|------|
| tTA RNA<br>(qRT-PCR)       | 7.64 <sup>A</sup> | 5.70 <sup>AB</sup> | 3.42 <sup>B</sup> | 2.35 | <i>p</i> = .0022                     | 7,16 |
| Larval<br>Fluorescence     | 9.04 <sup>A</sup> | 9.36 <sup>A</sup>  | 4.29 <sup>B</sup> | 3.04 | <i>p</i> = .0005                     | 7,64 |
| ZsGreen<br>RNA<br>(RNAseq) | 8.75 <sup>A</sup> | 7.52 <sup>A</sup>  | 4.21 <sup>B</sup> | 2.28 | 4.90 ( <i>p</i> =<br>.0041)          | 7,16 |

In a given row of the table, two means with the same letter do not differ significantly
