# Supplementary material
Source: publisher figshare collection journal article supplement (https://gsajournals.figshare.com/articles/dataset/_/11771622)
Supplement: Supplementary file 7 [file 1]

**Supplementary Table 2.** Analysis of variance (ANOVA) of female lethality. df: degrees of freedom; SS: sum of squares; MS: mean squares; F: F-statistic.

| Source       | df  | SS        | MS       | F      | <i>P</i> -value |
|--------------|-----|-----------|----------|--------|-----------------|
| <b>Line</b>  | 200 | 4.3774020 | 0.021887 | 8.4044 | <0.0001         |
| <b>Error</b> | 201 | 0.5234500 | 0.002604 |        |                 |
