# Supplementary material
Source: publisher figshare collection journal article supplement (https://gsajournals.figshare.com/articles/dataset/_/11771622)
Supplement: Supplementary file 9 [file 1]

Table S8: Expression levels of genes identified as downregulated in DGRP lines crossed to the FL3#2 tTA overexpressing line that had high lethality when compared to DGRP lines crossed to the FL3#2 tTA overexpressing line that had low lethality, and also when compared to the DGRP lines crossed to the FL3#2 tTA overexpressing line that had low lethality when separated into two groups: those with higher expression levels of tTA, and those with lower expression levels of tTA

| GENE*       | ALL low <sup>†</sup> | Low tTA <sup>‡</sup> | High tTA <sup>**</sup> | 153H <sup>‡</sup> | 195H           | 399H           | 911H           | 350L            | 492L            | 317L            | 646L            |
|-------------|----------------------|----------------------|------------------------|-------------------|----------------|----------------|----------------|-----------------|-----------------|-----------------|-----------------|
| FBgn0011571 | +                    | +                    | +                      | 43.97±4.22        | 41.78±4.20     | 46.63±1.28     | 48.92±3.23     | 51.02±3.38      | 50.94±6.80      | 53.94±4.30      | 55.36±7.37      |
| FBgn0011824 | +                    | +                    | +                      | 27.92±2.81        | 28.65±1.36     | 29.02±1.35     | 32.72±2.57     | 36.48±1.79      | 36.13±0.91      | 40.65±2.56      | 36.01±5.92      |
| FBgn0013269 | +                    | +                    | +                      | 52.81±4.35        | 51.91±2.37     | 53.91±2.74     | 59.52±4.51     | 59.92±2.26      | 65.75±2.89      | 69.39±2.91      | 66.19±11.45     |
| FBgn0015393 | +                    | +                    | +                      | 47.95±1.41        | 54.72±2.33     | 51.26±1.49     | 57.23±2.69     | 64.70±5.88      | 60.16±2.24      | 72.61±7.06      | 62.54±9.55      |
| FBgn0029148 | +                    | +                    | +                      | 31.49±1.75        | 38.38±0.61     | 35.45±3.40     | 40.15±1.93     | 44.45±2.45      | 42.61±3.26      | 46.68±4.84      | 44.56±7.59      |
| FBgn0029828 | +                    | +                    | +                      | 11.59±1.72        | 10.09±1.44     | 7.52±1.11      | 10.40±2.32     | 16.10±2.90      | 13.76±1.40      | 17.26±2.31      | 14.16±1.74      |
| FBgn0030067 | +                    | +                    | +                      | 8.66±0.31         | 8.11±0.42      | 8.41±0.57      | 10.09±0.29     | 10.97±0.69      | 10.35±0.53      | 11.94±1.01      | 11.56±1.92      |
| FBgn0030465 | +                    | +                    | +                      | 10.53±0.74        | 8.90±1.09      | 10.53±0.43     | 10.11±0.60     | 12.55±1.24      | 12.62±0.51      | 11.23±0.92      | 13.49±1.14      |
| FBgn0032298 | +                    | +                    | +                      | 7.48±0.34         | 7.18±0.36      | 7.11±0.33      | 8.10±0.56      | 8.91±0.30       | 8.46±0.59       | 9.64±0.76       | 8.67±1.52       |
| FBgn0033378 | +                    | +                    | +                      | 43.20±2.54        | 42.42±0.72     | 44.77±2.95     | 51.55±2.10     | 52.01±0.90      | 48.37±2.75      | 54.34±2.03      | 51.64±4.86      |
| FBgn0034290 | +                    | +                    | +                      | 274.59±60.86      | 270.75±32.23   | 265.47±35.93   | 300.78±41.21   | 428.90±23.24    | 346.47±8.80     | 396.19±79.78    | 395.85±41.61    |
| FBgn0034902 | +                    | +                    | +                      | 64.76±3.20        | 58.38±2.24     | 64.11±2.84     | 66.12±4.11     | 79.86±2.66      | 66.41±8.32      | 68.26±1.93      | 91.26±2.66      |
| FBgn0036381 | +                    | +                    | +                      | 57.59±12.00       | 47.78±14.50    | 54.69±10.12    | 37.04±5.28     | 70.30±12.06     | 81.24±21.64     | 81.39±10.28     | 81.08±2.94      |
| FBgn0036467 | +                    | +                    | +                      | 857.51±113.33     | 970.23±187.11  | 1084.90±93.57  | 853.09±74.74   | 1464.80±70.74   | 1153.71±169.27  | 1095.91±145.00  | 1744.18±78.29   |
| FBgn0036667 | +                    | +                    | +                      | 109.08±5.35       | 113.34±2.25    | 123.71±15.21   | 130.85±3.14    | 153.38±4.55     | 153.59±4.75     | 151.76±4.90     | 142.44±16.08    |
| FBgn0038523 | +                    | +                    | +                      | 210.71±127.17     | 237.84±130.13  | 335.63±142.63  | 102.36±23.97   | 659.54±244.74   | 1443.02±658.03  | 918.72±598.97   | 1369.16±612.31  |
| FBgn0038808 | +                    | +                    | +                      | 58.85±1.25        | 55.00±8.91     | 60.61±5.31     | 66.97±2.25     | 82.30±2.01      | 79.54±3.65      | 84.57±3.59      | 74.37±4.81      |
| FBgn0039155 | +                    | +                    | +                      | 7.53±1.13         | 9.98±2.28      | 12.01±1.03     | 11.57±0.15     | 16.11±0.29      | 12.73±2.48      | 20.71±3.77      | 12.39±1.36      |
| FBgn0040565 | +                    | +                    | +                      | 148.40±52.25      | 364.23±164.44  | 195.00±55.73   | 185.00±47.26   | 637.43±193.10   | 452.01±148.24   | 356.15±186.19   | 1042.75±373.28  |
| FBgn0040609 | +                    | +                    | +                      | 141.72±31.72      | 154.07±24.99   | 175.99±42.18   | 139.46±18.33   | 269.45±22.93    | 260.49±15.41    | 326.95±34.14    | 235.84±41.59    |
| FBgn0066084 | +                    | +                    | +                      | 9156.21±1119.15   | 9012.95±402.97 | 8075.98±394.87 | 10060.39±91.60 | 11274.23±712.27 | 10668.21±930.07 | 11587.97±477.87 | 11849.67±204.70 |
| FBgn0085753 | +                    | +                    | +                      | 149.59±25.17      | 119.88±12.95   | 98.39±14.58    | 152.15±27.12   | 435.49±47.17    | 505.81±81.50    | 405.29±21.58    | 496.57±205.13   |
| FBgn0261791 | +                    | +                    | +                      | 65.67±2.38        | 60.65±3.56     | 68.02±7.02     | 67.99±5.62     | 78.32±4.30      | 73.20±2.76      | 78.72±2.35      | 78.00±7.30      |
| FBgn0267511 | +                    | +                    | +                      | 411.90±73.14      | 320.04±37.06   | 265.09±32.01   | 426.42±79.44   | 1104.42±134.64  | 1286.95±217.71  | 1075.29±52.58   | 1275.00±558.21  |
| FBgn0000566 | +                    | +                    |                        | 53.26±4.58        | 66.37±9.53     | 49.89±3.51     | 61.78±6.31     | 71.36±5.30      | 84.75±7.68      | 81.37±4.94      | 58.09±3.62      |
| FBgn0003086 | +                    | +                    |                        | 73.54±5.95        | 125.43±25.66   | 111.56±19.20   | 116.63±16.50   | 171.73±12.42    | 166.87±13.77    | 99.14±2.67      | 191.61±11.75    |
| FBgn0003278 | +                    | +                    |                        | 3.33±0.23         | 3.09±0.10      | 3.05±0.38      | 3.21±0.22      | 3.73±0.24       | 3.51±0.32       | 3.72±0.41       | 3.43±0.39       |
| FBgn0003378 | +                    | +                    |                        | 1437.38±730.58    | 1768.62±843.30 | 1560.99±388.28 | 2479.60±398.73 | 2722.41±710.76  | 5462.30±2488.80 | 3687.84±1277.29 | 2958.82±463.33  |
| FBgn0004132 | +                    | +                    |                        | 37.50±2.07        | 33.73±3.67     | 37.45±4.33     | 42.01±1.00     | 46.52±1.13      | 46.40±2.73      | 47.58±0.21      | 38.60±2.01      |
| FBgn0004396 | +                    | +                    |                        | 22.50±3.08        | 20.26±2.16     | 22.08±3.46     | 16.74±0.69     | 25.57±2.91      | 28.19±2.65      | 23.40±2.04      | 25.63±2.13      |
| FBgn0004592 | +                    | +                    |                        | 231.51±12.82      | 431.10±281.75  | 424.24±142.16  | 281.37±59.22   | 546.37±93.96    | 1057.67±358.98  | 405.30±126.67   | 771.06±52.36    |
| FBgn0004654 | +                    | +                    |                        | 46.75±8.68        | 53.36±5.76     | 46.73±6.74     | 56.21±4.24     | 89.21±2.82      | 69.35±11.44     | 75.61±6.12      | 42.28±0.57      |
| FBgn0010226 | +                    | +                    |                        | 127.72±11.26      | 110.69±13.39   | 126.15±4.70    | 124.20±3.74    | 154.76±5.37     | 143.30±5.42     | 163.34±8.80     | 125.00±10.49    |
| FBgn0012034 | +                    | +                    |                        | 73.32±12.76       | 81.39±8.70     | 73.53±6.07     | 96.32±1.69     | 122.29±8.29     | 109.63±21.97    | 88.00±1.95      | 93.85±7.70      |
| FBgn0013681 | +                    | +                    |                        | 1072.27±64.86     | 1098.63±169.20 | 1062.97±32.51  | 1223.09±103.62 | 1289.79±98.02   | 1567.12±182.49  | 1343.88±69.05   | 1286.39±123.94  |
| FBgn0013685 | +                    | +                    |                        | 36.42±1.09        | 38.75±9.31     | 28.45±1.06     | 43.58±1.37     | 53.06±4.24      | 68.49±14.48     | 35.49±0.80      | 43.40±5.57      |
| FBgn0013749 | +                    | +                    |                        | 107.78±2.75       | 109.00±7.79    | 109.03±8.29    | 110.14±3.29    | 134.77±4.61     | 133.32±5.61     | 127.14±3.88     | 107.21±6.16     |

|             |   |   |  |                |                |                |                |                |                |                |               |
|-------------|---|---|--|----------------|----------------|----------------|----------------|----------------|----------------|----------------|---------------|
| FBgn0015075 | + | + |  | 8.27±0.46      | 7.78±0.41      | 8.86±0.37      | 7.55±0.71      | 9.16±0.79      | 9.77±0.61      | 9.24±0.25      | 8.79±0.79     |
| FBgn0015298 | + | + |  | 35.55±2.06     | 38.68±1.70     | 43.01±1.37     | 44.80±0.56     | 49.55±2.66     | 49.18±4.99     | 47.48±1.22     | 44.43±3.31    |
| FBgn0015379 | + | + |  | 17.02±1.14     | 17.67±0.92     | 19.22±1.01     | 21.03±1.49     | 21.29±1.14     | 21.16±0.69     | 21.88±1.23     | 20.65±2.33    |
| FBgn0020236 | + | + |  | 43.91±2.06     | 54.45±3.42     | 50.99±8.06     | 53.27±6.66     | 78.02±4.72     | 64.90±8.48     | 76.57±4.31     | 42.78±1.71    |
| FBgn0021795 | + | + |  | 136.27±15.69   | 173.50±18.79   | 195.90±23.63   | 240.56±23.22   | 283.38±12.36   | 259.62±45.82   | 262.57±4.77    | 183.46±13.15  |
| FBgn0022343 | + | + |  | 56.74±2.13     | 57.53±0.60     | 62.83±3.63     | 66.37±0.87     | 72.49±1.54     | 72.07±3.37     | 75.56±3.27     | 63.98±5.18    |
| FBgn0023170 | + | + |  | 4012.08±454.83 | 3784.03±258.65 | 3342.73±117.81 | 4379.08±100.30 | 4946.33±237.66 | 4634.95±435.03 | 4660.43±112.06 | 4784.71±49.99 |
| FBgn0024188 | + | + |  | 24.50±1.22     | 26.04±1.41     | 26.53±1.02     | 29.00±2.42     | 33.21±0.51     | 33.96±2.89     | 30.53±0.54     | 28.66±1.00    |
| FBgn0024983 | + | + |  | 16.60±2.07     | 15.28±1.62     | 19.97±1.69     | 16.47±0.24     | 22.46±1.35     | 21.93±0.66     | 18.63±1.19     | 17.78±1.59    |
| FBgn0025678 | + | + |  | 86.82±8.98     | 108.62±6.56    | 93.56±14.61    | 106.18±8.45    | 137.56±3.52    | 138.35±19.43   | 111.16±0.46    | 111.56±9.97   |
| FBgn0025684 | + | + |  | 13.04±1.32     | 14.97±1.10     | 18.23±2.05     | 14.40±0.20     | 22.96±2.13     | 22.25±3.28     | 18.09±0.21     | 19.26±2.48    |
| FBgn0026879 | + | + |  | 206.19±16.20   | 218.66±3.71    | 208.07±10.92   | 263.99±5.52    | 296.45±9.64    | 289.67±13.20   | 289.01±4.51    | 254.48±24.10  |
| FBgn0027496 | + | + |  | 39.06±0.83     | 38.72±1.94     | 40.13±3.67     | 41.52±0.77     | 47.59±1.23     | 49.56±3.14     | 45.39±1.07     | 40.21±2.03    |
| FBgn0028343 | + | + |  | 17.39±0.29     | 16.49±1.84     | 17.34±1.25     | 16.13±1.74     | 19.50±1.50     | 19.68±2.33     | 18.00±0.64     | 18.97±1.86    |
| FBgn0028855 | + | + |  | 275.46±73.33   | 166.00±80.96   | 221.77±47.68   | 265.11±16.92   | 397.21±46.03   | 386.03±73.52   | 502.91±22.77   | 212.92±12.25  |
| FBgn0029503 | + | + |  | 16.30±1.37     | 16.14±2.01     | 14.58±1.45     | 15.93±1.04     | 20.67±0.54     | 18.40±0.45     | 20.33±0.85     | 17.09±2.87    |
| FBgn0029882 | + | + |  | 44.87±2.54     | 46.88±4.05     | 43.65±3.12     | 50.53±3.05     | 59.61±3.12     | 50.46±2.88     | 60.77±4.11     | 53.64±8.56    |
| FBgn0029929 | + | + |  | 16.69±0.07     | 17.22±1.28     | 18.48±1.04     | 19.20±0.55     | 20.84±1.25     | 21.87±0.45     | 21.07±0.42     | 18.19±1.55    |
| FBgn0030306 | + | + |  | 145.07±17.51   | 147.26±15.31   | 153.59±13.71   | 169.52±2.26    | 210.87±7.35    | 213.26±4.95    | 182.19±11.93   | 170.05±12.79  |
| FBgn0030341 | + | + |  | 50.04±3.57     | 55.13±3.30     | 55.46±4.19     | 57.92±2.65     | 67.12±0.69     | 69.40±5.44     | 68.66±2.21     | 59.87±5.50    |
| FBgn0030443 | + | + |  | 51.95±20.88    | 60.03±21.23    | 71.14±14.48    | 43.61±6.36     | 127.71±33.88   | 152.89±9.90    | 73.76±19.27    | 97.18±18.97   |
| FBgn0030447 | + | + |  | 25.43±1.03     | 21.62±0.42     | 24.43±0.63     | 25.38±0.59     | 33.82±1.11     | 25.94±0.54     | 26.75±0.30     | 25.65±1.26    |
| FBgn0030658 | + | + |  | 23.73±1.95     | 28.44±1.00     | 30.37±1.77     | 25.30±0.42     | 32.66±0.83     | 32.83±2.26     | 30.48±1.88     | 30.77±3.39    |
| FBgn0030734 | + | + |  | 64.10±4.56     | 67.18±1.26     | 68.78±5.28     | 68.17±2.21     | 85.12±3.69     | 85.68±1.17     | 73.94±2.27     | 76.44±6.49    |
| FBgn0031049 | + | + |  | 187.01±15.69   | 179.53±28.34   | 148.80±17.41   | 170.07±20.49   | 274.86±5.90    | 198.48±30.06   | 272.25±7.39    | 187.93±16.58  |
| FBgn0031392 | + | + |  | 8.17±0.66      | 8.91±0.70      | 8.57±0.36      | 8.42±0.52      | 9.58±0.23      | 10.27±0.54     | 10.06±0.60     | 8.98±0.88     |
| FBgn0031913 | + | + |  | 145.45±26.13   | 159.63±28.71   | 188.15±8.21    | 214.35±26.95   | 248.46±1.44    | 230.54±8.94    | 264.85±40.41   | 177.42±7.68   |
| FBgn0032198 | + | + |  | 158.18±8.68    | 164.87±21.19   | 177.46±10.30   | 203.56±10.47   | 213.12±7.84    | 242.25±34.77   | 241.41±5.04    | 171.40±14.25  |
| FBgn0032725 | + | + |  | 91.57±3.17     | 98.62±0.82     | 98.96±8.32     | 106.39±3.78    | 110.85±2.23    | 115.33±5.01    | 110.82±4.76    | 107.93±1.26   |
| FBgn0032773 | + | + |  | 483.04±98.66   | 582.59±124.34  | 582.13±55.30   | 634.76±101.97  | 919.42±30.42   | 815.93±136.55  | 980.67±159.44  | 599.62±91.12  |
| FBgn0032799 | + | + |  | 29.67±1.67     | 35.57±1.90     | 30.49±2.42     | 33.08±0.83     | 39.89±1.32     | 42.01±0.73     | 39.40±1.69     | 31.76±1.59    |
| FBgn0032961 | + | + |  | 44.90±2.48     | 45.30±5.03     | 41.79±5.99     | 48.85±0.87     | 53.31±1.47     | 54.58±3.81     | 54.96±5.54     | 46.66±4.76    |
| FBgn0034528 | + | + |  | 6.35±0.98      | 5.21±0.46      | 6.33±0.28      | 6.10±0.24      | 7.85±0.44      | 7.05±0.92      | 6.88±0.51      | 6.96±1.50     |
| FBgn0034710 | + | + |  | 58.93±24.30    | 107.96±17.89   | 139.00±28.27   | 210.94±8.68    | 233.49±43.74   | 382.56±73.64   | 221.63±26.30   | 168.40±9.38   |
| FBgn0035147 | + | + |  | 83.75±12.97    | 89.19±7.30     | 87.22±7.49     | 75.45±1.63     | 131.33±3.82    | 122.66±13.39   | 90.44±8.46     | 106.47±11.21  |
| FBgn0035603 | + | + |  | 35.08±4.18     | 41.57±1.96     | 38.32±3.01     | 52.19±2.52     | 44.07±2.48     | 59.10±5.40     | 56.16±2.51     | 43.94±5.17    |
| FBgn0035622 | + | + |  | 19.64±1.44     | 22.59±1.01     | 23.11±2.00     | 20.36±0.07     | 25.55±1.03     | 27.07±0.71     | 23.11±0.39     | 22.28±1.02    |
| FBgn0035762 | + | + |  | 7.06±0.31      | 6.87±0.43      | 6.66±0.50      | 6.92±0.37      | 7.91±0.29      | 7.93±0.34      | 7.03±0.16      | 7.91±0.68     |
| FBgn0035944 | + | + |  | 37.95±2.15     | 37.49±1.91     | 38.31±2.50     | 37.34±1.51     | 45.83±2.30     | 43.63±0.33     | 40.56±0.78     | 40.72±2.45    |
| FBgn0036124 | + | + |  | 4.76±0.24      | 5.25±0.16      | 5.29±0.12      | 5.40±0.34      | 5.78±0.68      | 6.08±0.32      | 6.27±0.31      | 5.33±0.60     |
| FBgn0036300 | + | + |  | 28.07±3.82     | 30.37±1.82     | 29.38±1.81     | 34.52±1.47     | 43.43±0.49     | 43.05±5.80     | 36.14±3.27     | 31.03±2.89    |
| FBgn0036489 | + | + |  | 12.88±1.39     | 13.33±1.88     | 14.78±1.03     | 15.41±0.32     | 19.23±0.12     | 18.47±1.34     | 18.38±1.35     | 14.49±0.56    |
| FBgn0036493 | + | + |  | 38.61±10.64    | 38.18±12.92    | 47.04±4.07     | 41.08±6.63     | 56.62±11.25    | 76.53±10.89    | 60.50±14.69    | 48.73±4.80    |
| FBgn0036580 | + | + |  | 55.50±4.86     | 59.44±1.38     | 54.01±1.06     | 62.06±0.69     | 69.04±0.89     | 66.33±4.76     | 68.72±2.43     | 60.63±4.46    |
| FBgn0036787 | + | + |  | 31.77±5.05     | 41.29±8.52     | 39.12±0.26     | 45.49±2.21     | 59.91±11.30    | 57.73±3.92     | 44.62±7.93     | 45.47±1.87    |

|             |   |   |   |               |               |               |               |                |               |                |               |
|-------------|---|---|---|---------------|---------------|---------------|---------------|----------------|---------------|----------------|---------------|
| FBgn0036909 | + | + |   | 26.40±3.62    | 28.69±2.33    | 25.53±1.11    | 33.37±1.98    | 36.85±2.66     | 37.13±3.87    | 33.91±0.43     | 29.42±1.37    |
| FBgn0037290 | + | + |   | 11.92±1.33    | 10.89±1.98    | 10.80±3.30    | 13.80±2.10    | 84.24±15.62    | 22.87±8.26    | 19.74±4.41     | 7.77±0.86     |
| FBgn0038063 | + | + |   | 5.24±0.55     | 4.87±0.09     | 5.77±0.50     | 5.74±0.74     | 16.43±0.73     | 5.72±0.62     | 4.63±0.60      | 5.97±0.89     |
| FBgn0038088 | + | + |   | 55.04±1.43    | 38.47±10.42   | 41.16±1.71    | 41.52±4.99    | 48.08±4.75     | 82.55±13.74   | 53.46±6.22     | 54.77±9.04    |
| FBgn0038196 | + | + |   | 40.73±1.91    | 44.16±2.76    | 39.21±2.10    | 44.16±2.62    | 46.36±2.30     | 57.01±6.19    | 57.53±2.83     | 45.29±4.53    |
| FBgn0038428 | + | + |   | 24.95±2.27    | 23.78±1.55    | 24.44±1.94    | 27.65±1.21    | 27.39±1.42     | 29.04±1.33    | 30.02±1.62     | 25.82±2.22    |
| FBgn0038585 | + | + |   | 14.90±2.15    | 15.69±1.01    | 16.12±2.89    | 13.57±0.64    | 21.43±1.43     | 18.80±1.80    | 17.78±2.67     | 16.16±2.31    |
| FBgn0038771 | + | + |   | 75.15±2.28    | 70.18±1.30    | 68.99±0.31    | 73.82±4.17    | 91.72±4.64     | 79.38±2.43    | 78.79±2.70     | 75.10±2.65    |
| FBgn0039172 | + | + |   | 122.92±9.43   | 130.87±10.55  | 136.80±10.75  | 134.54±5.35   | 163.52±3.54    | 164.67±8.35   | 151.61±8.18    | 136.77±6.07   |
| FBgn0039800 | + | + |   | 327.69±73.89  | 278.25±70.33  | 305.85±23.14  | 317.44±36.70  | 447.75±29.37   | 507.59±41.79  | 377.43±72.68   | 372.78±14.02  |
| FBgn0040087 | + | + |   | 14.23±0.44    | 13.71±0.57    | 13.68±1.22    | 14.18±0.43    | 16.11±0.40     | 16.00±0.88    | 15.44±0.12     | 15.44±0.86    |
| FBgn0040228 | + | + |   | 20.73±1.73    | 17.83±1.15    | 18.44±0.96    | 19.81±1.55    | 23.35±1.14     | 23.32±0.57    | 20.13±1.19     | 23.27±1.14    |
| FBgn0040340 | + | + |   | 100.87±17.12  | 105.98±17.30  | 118.22±12.51  | 117.34±8.41   | 151.09±5.30    | 167.06±25.89  | 150.18±2.78    | 103.54±7.28   |
| FBgn0040512 | + | + |   | 76.17±4.32    | 82.17±1.90    | 83.81±5.87    | 85.47±1.95    | 98.09±3.75     | 102.14±6.82   | 89.75±2.16     | 87.19±6.04    |
| FBgn0040718 | + | + |   | 802.78±26.00  | 704.75±179.89 | 856.99±82.92  | 954.70±103.34 | 1121.94±126.69 | 1253.74±89.86 | 910.01±47.66   | 633.16±73.24  |
| FBgn0050349 | + | + |   | 11.99±0.28    | 11.38±0.69    | 11.71±0.40    | 11.88±0.44    | 12.81±0.67     | 14.09±0.92    | 13.81±0.42     | 12.99±1.21    |
| FBgn0052425 | + | + |   | 35.29±2.27    | 29.84±0.92    | 36.75±6.87    | 37.51±2.07    | 45.47±2.21     | 41.78±3.00    | 39.80±1.22     | 44.93±2.33    |
| FBgn0085220 | + | + |   | 86.65±6.30    | 79.62±3.83    | 86.74±5.25    | 97.39±4.12    | 112.07±1.44    | 112.63±11.62  | 100.19±6.01    | 87.43±5.23    |
| FBgn0085308 | + | + |   | 79.62±18.86   | 83.57±41.21   | 106.85±16.92  | 84.34±15.53   | 132.66±23.77   | 189.51±57.85  | 112.07±21.71   | 166.24±19.92  |
| FBgn0243511 | + | + |   | 7.77±0.44     | 7.59±0.36     | 7.31±0.70     | 7.61±0.53     | 8.57±0.22      | 8.32±0.69     | 9.04±0.36      | 8.29±0.76     |
| FBgn0259937 | + | + |   | 37.75±1.80    | 41.57±2.35    | 42.75±0.88    | 45.06±1.40    | 46.84±0.68     | 47.11±2.00    | 50.52±4.54     | 50.68±9.67    |
| FBgn0261020 | + | + |   | 33.87±3.12    | 38.10±1.08    | 34.03±2.39    | 32.17±1.43    | 46.56±0.15     | 42.55±2.17    | 41.61±0.32     | 37.73±1.78    |
| FBgn0261284 | + | + |   | 32.18±1.18    | 26.09±3.64    | 31.13±0.97    | 35.99±1.24    | 37.90±1.25     | 37.62±1.94    | 36.20±2.34     | 33.50±2.52    |
| FBgn0262613 | + | + |   | 41.14±13.63   | 67.97±16.14   | 82.83±14.37   | 58.20±6.28    | 106.95±10.71   | 121.46±41.27  | 71.09±6.30     | 82.78±3.83    |
| FBgn0262801 | + | + |   | 90.52±9.17    | 92.93±7.21    | 98.85±9.31    | 108.49±6.54   | 130.08±1.56    | 128.05±8.17   | 122.93±4.54    | 96.88±6.42    |
| FBgn0263510 | + | + |   | 15.56±1.17    | 12.62±0.72    | 12.43±0.91    | 14.68±0.53    | 15.74±0.62     | 15.84±1.38    | 16.23±1.06     | 16.01±2.12    |
| FBgn0264443 | + | + |   | 3.86±0.33     | 3.39±1.03     | 3.42±0.87     | 3.06±0.41     | 4.64±0.54      | 5.45±0.84     | 4.31±0.53      | 4.08±0.28     |
| FBgn0267330 | + | + |   | 103.35±6.85   | 117.27±4.53   | 111.75±10.14  | 107.84±0.98   | 140.08±1.44    | 140.82±12.68  | 137.79±4.76    | 120.78±7.92   |
| FBgn0001325 | + |   | + | 8.67±1.79     | 6.28±0.55     | 11.06±0.72    | 6.68±0.96     | 11.59±1.80     | 10.21±1.77    | 11.20±2.42     | 13.88±1.42    |
| FBgn0003041 | + |   | + | 14.98±1.70    | 13.22±1.19    | 12.98±0.47    | 13.29±1.77    | 12.96±0.80     | 12.11±1.07    | 36.42±4.25     | 14.09±1.02    |
| FBgn0005694 | + |   | + | 8.63±0.21     | 7.67±0.13     | 8.52±1.10     | 7.54±0.26     | 8.01±0.28      | 8.49±0.53     | 9.05±0.89      | 43.14±7.47    |
| FBgn0010774 | + |   | + | 66.57±5.48    | 63.26±3.41    | 71.34±4.44    | 70.18±3.97    | 70.46±0.80     | 71.04±8.77    | 77.54±3.08     | 76.28±6.64    |
| FBgn0015299 | + |   | + | 38.49±3.74    | 35.78±2.96    | 35.03±1.91    | 41.81±4.60    | 39.66±1.68     | 39.37±0.62    | 41.98±3.91     | 48.08±4.80    |
| FBgn0023167 | + |   | + | 47.06±5.10    | 46.60±4.39    | 52.28±5.19    | 48.65±3.36    | 55.11±1.56     | 50.31±7.84    | 55.39±3.31     | 59.14±5.92    |
| FBgn0024491 | + |   | + | 24.15±1.81    | 21.30±2.02    | 26.49±0.62    | 28.09±1.42    | 25.74±1.44     | 26.17±2.81    | 29.70±1.96     | 26.58±2.53    |
| FBgn0028398 | + |   | + | 29.77±1.18    | 26.18±1.66    | 29.13±1.88    | 35.17±0.94    | 35.71±2.79     | 32.22±1.63    | 36.44±0.81     | 36.21±2.61    |
| FBgn0029915 | + |   | + | 19.73±2.18    | 17.49±0.99    | 19.14±1.05    | 21.35±1.49    | 20.49±1.30     | 22.60±1.63    | 22.61±2.45     | 26.06±4.79    |
| FBgn0031558 | + |   | + | 991.23±143.68 | 559.44±125.93 | 661.81±121.72 | 747.18±79.61  | 929.21±76.70   | 808.08±147.87 | 1136.00±266.54 | 1264.19±79.64 |
| FBgn0031791 | + |   | + | 24.99±5.93    | 24.95±9.85    | 27.52±8.84    | 17.44±0.85    | 35.32±4.76     | 42.57±15.22   | 40.66±20.39    | 51.41±17.50   |
| FBgn0032919 | + |   | + | 21.75±1.43    | 22.61±1.49    | 25.00±0.69    | 22.37±1.68    | 25.32±1.40     | 24.21±2.18    | 28.29±1.95     | 28.76±5.73    |
| FBgn0033571 | + |   | + | 19.17±1.07    | 17.72±1.45    | 18.24±0.33    | 21.31±1.20    | 20.89±2.06     | 20.67±1.63    | 28.17±2.08     | 21.83±2.40    |
| FBgn0034858 | + |   | + | 12.90±0.41    | 12.06±1.52    | 14.18±1.54    | 12.89±0.58    | 13.67±0.58     | 14.61±1.61    | 19.58±1.71     | 16.83±1.14    |
| FBgn0035904 | + |   | + | 91.88±10.35   | 75.25±10.59   | 84.17±9.69    | 80.52±0.97    | 84.14±7.69     | 96.54±5.62    | 138.88±9.93    | 107.49±19.03  |
| FBgn0036557 | + |   | + | 13.95±1.35    | 15.54±1.92    | 14.16±0.31    | 14.81±0.69    | 13.88±0.97     | 14.33±1.39    | 54.53±6.10     | 16.49±1.05    |
| FBgn0036641 | + |   | + | 14.70±1.56    | 13.27±1.10    | 16.24±0.76    | 16.89±1.49    | 15.28±0.58     | 17.27±3.21    | 18.66±0.62     | 21.39±4.22    |

|             |   |   |   |                 |                 |                 |                 |                 |                 |                 |                 |
|-------------|---|---|---|-----------------|-----------------|-----------------|-----------------|-----------------|-----------------|-----------------|-----------------|
| FBgn0036775 | + |   | + | 9.07±0.49       | 7.81±0.24       | 9.38±0.94       | 9.41±0.72       | 8.98±0.46       | 9.84±1.64       | 10.23±1.16      | 11.08±1.26      |
| FBgn0037130 | + |   | + | 4.06±0.70       | 3.53±0.31       | 3.97±0.16       | 4.33±0.82       | 3.52±0.09       | 3.48±0.94       | 3.43±0.68       | 22.12±4.40      |
| FBgn0038964 | + |   | + | 24.90±2.14      | 25.06±2.04      | 24.55±1.05      | 27.51±1.51      | 28.00±1.85      | 27.09±1.27      | 32.34±3.22      | 30.48±4.36      |
| FBgn0039419 | + |   | + | 4.14±0.26       | 3.99±0.28       | 4.02±0.21       | 3.70±0.19       | 4.68±0.16       | 3.98±0.59       | 6.21±1.31       | 4.38±0.51       |
| FBgn0063127 | + |   | + | 73.37±7.01      | 66.97±17.74     | 93.53±8.48      | 68.43±8.75      | 85.61±7.41      | 85.21±23.62     | 116.45±14.04    | 120.46±23.12    |
| FBgn0259834 | + |   | + | 5.00±0.50       | 5.35±0.43       | 5.14±0.45       | 4.32±0.50       | 6.13±0.45       | 5.76±0.71       | 8.35±1.67       | 5.88±0.62       |
| FBgn0259993 | + |   | + | 85.27±6.96      | 82.21±3.83      | 103.78±7.25     | 97.77±5.91      | 91.40±6.45      | 91.82±12.02     | 107.89±16.36    | 130.65±28.44    |
| FBgn0261933 | + |   | + | 26.01±2.38      | 25.39±1.86      | 26.49±2.46      | 27.47±1.89      | 27.91±1.49      | 29.35±2.10      | 32.35±1.73      | 29.39±3.43      |
| FBgn0263111 | + |   | + | 1.58±0.31       | 1.80±0.22       | 1.61±0.01       | 1.87±0.15       | 1.33±0.03       | 1.45±0.27       | 30.93±2.97      | 2.14±0.40       |
| FBgn0263762 | + |   | + | 80.54±19.25     | 82.32±48.51     | 103.80±33.71    | 42.35±8.02      | 96.66±3.60      | 147.33±82.68    | 265.71±54.53    | 262.75±43.91    |
| FBgn0000426 | + |   |   | 51.10±2.34      | 50.40±0.58      | 60.17±4.61      | 63.39±3.70      | 61.94±1.95      | 64.18±5.63      | 66.53±2.85      | 65.99±11.57     |
| FBgn0001197 | + |   |   | 131.17±9.14     | 126.52±6.40     | 136.08±8.76     | 144.53±11.75    | 143.63±6.20     | 145.19±11.04    | 145.92±7.21     | 161.05±22.51    |
| FBgn0003062 | + |   |   | 36.90±2.85      | 35.81±2.26      | 35.29±1.83      | 41.80±2.26      | 39.46±0.32      | 42.51±1.77      | 46.88±2.76      | 44.63±8.38      |
| FBgn0003275 | + |   |   | 31.47±2.65      | 33.01±3.17      | 36.10±3.82      | 39.00±1.82      | 38.98±1.23      | 39.07±2.57      | 42.45±2.38      | 40.68±4.76      |
| FBgn0003346 | + |   |   | 14.97±0.54      | 15.02±1.50      | 16.91±0.97      | 17.36±2.19      | 18.33±1.30      | 16.91±2.03      | 18.25±1.22      | 18.92±2.95      |
| FBgn0003377 | + |   |   | 5578.54±2755.94 | 8455.59±3963.73 | 9079.67±2094.27 | 9628.10±1870.21 | 11689.27±2422.6 | 19594.90±8995.5 | 13080.46±4046.9 | 17804.10±2603.9 |
| FBgn0010078 | + |   |   | 2799.84±274.44  | 2820.39±151.18  | 2598.79±54.02   | 3033.18±55.14   | 3252.58±169.53  | 3221.16±192.61  | 3301.34±54.99   | 3509.58±107.56  |
| FBgn0016726 | + |   |   | 4158.73±372.32  | 3961.60±192.75  | 3912.42±122.73  | 4395.53±49.84   | 4692.95±208.17  | 4536.71±122.52  | 4947.80±65.78   | 5018.95±194.70  |
| FBgn0022288 | + |   |   | 9.65±0.77       | 9.14±0.30       | 9.27±0.92       | 10.06±0.21      | 10.62±0.58      | 10.90±0.64      | 12.01±0.66      | 9.88±1.20       |
| FBgn0022943 | + |   |   | 25.69±1.20      | 23.54±0.70      | 26.13±2.28      | 26.67±0.45      | 27.92±0.95      | 28.02±3.45      | 28.65±0.45      | 29.80±3.06      |
| FBgn0029867 | + |   |   | 19.12±1.39      | 15.40±1.32      | 18.56±2.45      | 19.33±2.25      | 21.61±0.83      | 19.84±1.51      | 20.72±2.00      | 21.53±2.17      |
| FBgn0030630 | + |   |   | 10.92±0.50      | 10.76±0.37      | 10.69±0.99      | 11.71±0.33      | 11.93±0.65      | 12.11±0.76      | 12.68±0.22      | 12.15±1.55      |
| FBgn0031115 | + |   |   | 6.64±0.70       | 6.40±0.93       | 7.90±0.58       | 6.95±0.42       | 7.14±0.37       | 7.79±0.45       | 8.32±0.08       | 8.07±0.59       |
| FBgn0033485 | + |   |   | 20.73±1.32      | 22.57±0.90      | 23.59±1.16      | 27.06±0.13      | 26.52±0.58      | 26.77±1.85      | 30.66±1.75      | 25.80±4.57      |
| FBgn0033912 | + |   |   | 4737.17±331.17  | 4465.37±147.08  | 4245.25±57.59   | 4673.26±97.13   | 5000.62±248.65  | 5022.12±159.70  | 5111.66±108.22  | 5596.81±223.18  |
| FBgn0034405 | + |   |   | 52.84±1.30      | 48.81±2.03      | 47.08±0.86      | 47.03±3.61      | 58.75±1.00      | 51.20±2.67      | 56.05±6.36      | 59.15±1.20      |
| FBgn0037707 | + |   |   | 14.73±1.16      | 14.31±1.75      | 16.16±1.14      | 17.25±1.70      | 17.03±0.34      | 16.42±1.35      | 17.68±1.79      | 17.62±2.01      |
| FBgn0037801 | + |   |   | 13.05±2.82      | 17.75±3.00      | 18.24±2.42      | 18.56±5.74      | 22.63±1.66      | 26.30±4.55      | 37.43±7.63      | 15.48±1.81      |
| FBgn0039735 | + |   |   | 96.97±7.35      | 104.35±1.72     | 104.53±4.05     | 115.58±7.68     | 117.71±1.80     | 118.37±7.79     | 125.74±4.79     | 120.27±18.69    |
| FBgn0050277 | + |   |   | 4.96±0.65       | 7.26±1.31       | 6.10±0.60       | 4.15±0.52       | 7.56±0.54       | 7.49±0.64       | 7.63±0.56       | 7.56±1.22       |
| FBgn0052446 | + |   |   | 74.51±8.07      | 69.51±1.16      | 75.65±5.16      | 82.45±3.54      | 82.86±2.84      | 84.36±10.84     | 83.19±2.44      | 88.06±5.29      |
| FBgn0085638 | + |   |   | 17.42±1.77      | 24.06±2.17      | 22.57±1.92      | 22.49±1.77      | 22.39±1.52      | 26.14±2.30      | 25.54±0.51      | 25.55±0.74      |
| FBgn0086472 | + |   |   | 3078.82±262.35  | 2942.73±117.29  | 2884.38±51.64   | 3325.45±48.30   | 3341.49±205.87  | 3393.96±135.68  | 3535.83±52.11   | 3766.11±148.93  |
| FBgn0260456 | + |   |   | 6.74±0.37       | 7.40±0.32       | 6.40±0.21       | 7.36±0.28       | 8.06±0.58       | 7.11±0.38       | 8.71±0.95       | 7.87±0.71       |
| FBgn0000150 |   | + |   | 972.61±113.74   | 993.94±112.03   | 873.99±70.70    | 1183.57±78.66   | 1249.46±89.63   | 1323.95±182.06  | 1264.85±34.66   | 896.82±26.80    |
| FBgn0001149 |   | + |   | 871.27±173.80   | 740.58±123.21   | 812.12±75.79    | 868.34±42.69    | 1148.30±16.22   | 1027.19±104.00  | 1129.70±70.14   | 771.82±39.58    |
| FBgn0003462 |   | + |   | 318.86±14.29    | 352.37±20.66    | 333.81±2.50     | 374.03±3.56     | 400.91±9.54     | 399.47±15.27    | 352.36±14.55    | 374.47±8.59     |
| FBgn0004057 |   | + |   | 10.12±0.51      | 10.56±0.69      | 11.20±1.50      | 11.41±1.18      | 12.18±1.02      | 13.64±1.50      | 13.64±1.95      | 10.04±0.96      |
| FBgn0004432 |   | + |   | 600.31±10.46    | 590.62±36.94    | 619.16±24.93    | 632.31±9.59     | 701.99±8.84     | 675.88±13.00    | 692.49±20.91    | 619.97±18.70    |
| FBgn0008635 |   | + |   | 39.13±1.38      | 41.79±2.41      | 42.46±2.55      | 42.75±0.36      | 49.99±1.39      | 48.19±2.19      | 46.64±0.76      | 39.23±1.54      |
| FBgn0010548 |   | + |   | 69.37±6.44      | 58.83±4.21      | 65.89±4.74      | 70.98±2.32      | 86.64±1.16      | 74.33±3.06      | 77.45±1.27      | 66.59±3.34      |
| FBgn0010638 |   | + |   | 246.74±43.30    | 257.38±45.48    | 240.13±34.65    | 306.32±32.62    | 372.19±6.19     | 365.48±75.26    | 359.95±5.69     | 234.43±15.29    |
| FBgn0010747 |   | + |   | 43.22±1.72      | 40.15±3.66      | 43.97±2.28      | 46.91±0.75      | 49.12±1.80      | 50.66±1.10      | 52.32±0.17      | 43.68±1.71      |
| FBgn0013954 |   | + |   | 427.03±38.16    | 427.93±23.65    | 431.36±21.47    | 512.49±29.67    | 558.99±5.43     | 558.40±51.70    | 555.09±29.70    | 426.73±14.80    |
| FBgn0014032 |   | + |   | 16.83±1.81      | 12.37±1.84      | 16.44±1.14      | 15.90±1.44      | 17.25±0.54      | 20.59±0.32      | 17.43±1.60      | 15.16±1.42      |

|             |  |   |  |              |              |              |              |              |              |              |              |
|-------------|--|---|--|--------------|--------------|--------------|--------------|--------------|--------------|--------------|--------------|
| FBgn0014368 |  | + |  | 54.04±14.87  | 2.11±0.13    | 3.60±1.78    | 47.55±3.13   | 81.38±25.83  | 215.80±55.15 | 5.60±1.58    | 54.35±17.72  |
| FBgn0014868 |  | + |  | 68.59±4.97   | 73.70±3.37   | 75.51±6.72   | 80.16±3.93   | 86.75±3.14   | 87.86±6.15   | 86.22±2.81   | 70.79±2.61   |
| FBgn0015797 |  | + |  | 45.00±1.38   | 48.25±3.88   | 50.41±3.54   | 45.89±0.48   | 50.54±1.34   | 54.19±1.70   | 51.33±2.20   | 45.25±3.70   |
| FBgn0023477 |  | + |  | 210.97±47.44 | 198.11±26.92 | 217.15±15.36 | 260.39±22.29 | 349.56±12.69 | 284.37±44.58 | 268.66±20.65 | 199.68±12.74 |
| FBgn0023542 |  | + |  | 11.91±0.34   | 11.79±0.15   | 12.63±1.19   | 11.54±0.37   | 18.55±0.56   | 12.58±1.29   | 12.57±0.83   | 12.11±0.74   |
| FBgn0024509 |  | + |  | 66.07±2.84   | 64.87±4.03   | 65.17±3.95   | 75.26±3.39   | 78.51±2.42   | 82.73±5.20   | 73.39±1.20   | 65.28±5.68   |
| FBgn0024994 |  | + |  | 15.81±1.66   | 16.38±1.13   | 17.66±1.98   | 15.05±0.34   | 20.95±1.81   | 19.46±1.12   | 15.60±0.50   | 15.72±0.80   |
| FBgn0025615 |  | + |  | 30.18±1.32   | 29.34±0.32   | 32.68±1.37   | 32.58±2.49   | 34.31±0.96   | 34.43±1.74   | 32.22±1.60   | 31.33±1.28   |
| FBgn0025620 |  | + |  | 119.80±42.33 | 131.74±41.23 | 144.68±1.84  | 202.28±34.81 | 297.81±24.55 | 179.24±50.19 | 192.12±26.13 | 201.02±29.76 |
| FBgn0025637 |  | + |  | 206.27±7.88  | 192.07±4.23  | 205.11±7.33  | 204.62±12.32 | 200.71±2.71  | 235.46±11.93 | 203.27±6.36  | 228.73±10.62 |
| FBgn0025700 |  | + |  | 156.24±27.09 | 165.18±22.80 | 164.94±21.93 | 179.10±20.26 | 230.66±9.99  | 222.39±40.13 | 237.12±5.12  | 138.90±3.39  |
| FBgn0025724 |  | + |  | 45.26±0.62   | 45.38±3.06   | 47.11±3.68   | 46.91±1.06   | 56.73±0.94   | 54.46±2.52   | 49.20±0.42   | 45.16±3.03   |
| FBgn0025725 |  | + |  | 31.47±1.02   | 34.40±2.05   | 33.53±2.28   | 34.12±0.68   | 39.17±0.36   | 37.70±1.18   | 35.23±0.80   | 33.71±2.25   |
| FBgn0026089 |  | + |  | 38.15±3.02   | 42.69±3.55   | 38.57±2.45   | 42.69±3.76   | 50.02±0.78   | 46.51±5.08   | 45.42±1.92   | 38.69±0.94   |
| FBgn0026576 |  | + |  | 14.72±1.22   | 12.18±1.54   | 11.74±1.26   | 16.44±2.40   | 19.36±1.89   | 14.93±0.76   | 14.09±0.44   | 14.70±1.41   |
| FBgn0028327 |  | + |  | 122.62±12.44 | 136.99±15.69 | 140.40±22.37 | 146.61±13.22 | 180.31±6.15  | 185.27±32.34 | 193.47±7.16  | 119.20±2.20  |
| FBgn0028375 |  | + |  | 7.63±0.17    | 8.04±0.19    | 8.36±0.69    | 7.47±0.45    | 10.39±0.54   | 7.69±0.45    | 7.22±0.61    | 6.78±0.48    |
| FBgn0028546 |  | + |  | 66.58±3.65   | 65.15±3.09   | 73.52±0.59   | 74.65±4.59   | 78.89±0.63   | 85.00±3.41   | 64.83±4.42   | 64.19±1.26   |
| FBgn0028563 |  | + |  | 44.25±3.31   | 29.79±2.46   | 34.06±3.23   | 43.04±7.07   | 61.78±5.38   | 41.34±3.91   | 42.42±5.24   | 42.70±4.59   |
| FBgn0028969 |  | + |  | 45.51±2.90   | 49.57±2.74   | 47.47±3.30   | 46.86±0.86   | 56.66±0.51   | 55.31±4.03   | 51.88±1.04   | 44.50±2.37   |
| FBgn0029709 |  | + |  | 79.96±7.82   | 79.23±7.96   | 84.97±7.56   | 81.50±1.79   | 94.47±1.36   | 101.17±10.41 | 90.66±2.02   | 79.54±5.19   |
| FBgn0030239 |  | + |  | 29.88±3.84   | 33.39±3.94   | 29.69±0.98   | 39.51±5.08   | 50.78±1.64   | 40.90±5.53   | 48.85±5.10   | 29.09±0.88   |
| FBgn0030305 |  | + |  | 33.49±2.47   | 31.88±3.35   | 33.43±3.21   | 38.01±0.18   | 40.94±1.71   | 42.97±2.16   | 40.02±1.39   | 32.42±3.00   |
| FBgn0030321 |  | + |  | 21.63±1.11   | 22.70±1.01   | 23.96±0.72   | 23.95±0.17   | 25.93±1.26   | 26.25±1.39   | 27.08±0.20   | 22.84±1.43   |
| FBgn0030519 |  | + |  | 409.26±58.86 | 407.12±56.65 | 391.37±31.83 | 389.64±12.29 | 551.84±29.27 | 450.54±9.39  | 464.94±35.08 | 456.04±13.51 |
| FBgn0030593 |  | + |  | 33.55±9.33   | 34.06±7.28   | 29.06±4.50   | 27.31±0.99   | 47.85±5.12   | 50.64±14.53  | 39.31±5.41   | 17.21±4.41   |
| FBgn0030607 |  | + |  | 6.76±1.45    | 8.16±2.46    | 7.55±0.43    | 8.55±1.32    | 11.20±1.05   | 11.97±0.92   | 8.04±1.13    | 8.53±0.84    |
| FBgn0030802 |  | + |  | 55.13±2.02   | 52.76±0.41   | 55.97±3.66   | 64.78±2.07   | 63.54±1.47   | 61.50±1.01   | 63.18±2.70   | 53.27±3.86   |
| FBgn0030930 |  | + |  | 20.20±2.57   | 21.82±4.81   | 29.09±3.13   | 22.95±2.06   | 31.61±3.46   | 29.36±1.86   | 22.35±0.53   | 29.12±5.12   |
| FBgn0031145 |  | + |  | 95.36±9.53   | 99.28±3.03   | 102.03±7.96  | 116.90±2.33  | 133.56±5.81  | 118.64±12.74 | 116.95±2.01  | 108.39±5.65  |
| FBgn0031217 |  | + |  | 10.83±0.44   | 13.37±0.84   | 12.92±0.55   | 14.01±0.40   | 15.24±0.74   | 15.70±0.91   | 15.15±1.12   | 12.52±1.30   |
| FBgn0031260 |  | + |  | 69.16±7.52   | 76.57±7.21   | 82.45±8.27   | 80.56±5.63   | 99.12±2.77   | 94.83±13.88  | 93.66±1.35   | 73.13±6.02   |
| FBgn0031497 |  | + |  | 45.53±2.74   | 47.78±2.13   | 49.26±2.70   | 50.72±0.38   | 56.87±1.48   | 57.41±3.98   | 56.02±0.83   | 45.11±1.82   |
| FBgn0031530 |  | + |  | 9.61±1.15    | 9.38±1.30    | 11.13±0.95   | 10.22±0.33   | 13.19±1.90   | 12.39±1.58   | 10.69±0.92   | 8.07±0.45    |
| FBgn0031600 |  | + |  | 21.71±1.24   | 23.88±0.86   | 23.36±1.13   | 23.76±0.27   | 28.50±0.54   | 24.06±1.04   | 23.17±1.98   | 23.36±0.36   |
| FBgn0031662 |  | + |  | 32.91±1.96   | 37.37±5.39   | 31.68±0.65   | 34.82±0.94   | 59.60±6.04   | 34.86±5.26   | 39.27±3.42   | 31.91±2.20   |
| FBgn0031703 |  | + |  | 14.47±2.35   | 13.07±4.12   | 12.14±1.52   | 14.17±1.60   | 22.43±2.18   | 21.21±6.28   | 14.74±2.95   | 9.03±1.68    |
| FBgn0031821 |  | + |  | 18.39±4.34   | 17.09±5.55   | 18.66±0.37   | 18.78±1.27   | 29.26±2.78   | 28.30±3.81   | 18.97±3.59   | 13.86±1.61   |
| FBgn0031824 |  | + |  | 24.81±3.14   | 20.83±1.74   | 21.99±1.08   | 21.14±1.42   | 31.25±2.91   | 35.03±6.34   | 31.59±2.90   | 16.84±1.20   |
| FBgn0032015 |  | + |  | 65.95±3.99   | 73.76±4.13   | 70.41±7.52   | 77.69±4.27   | 87.86±3.14   | 92.53±9.81   | 82.71±0.74   | 66.33±2.93   |
| FBgn0032161 |  | + |  | 12.41±1.16   | 15.90±0.59   | 11.25±0.07   | 17.44±1.03   | 18.89±0.19   | 18.70±1.73   | 16.27±2.44   | 15.65±0.78   |
| FBgn0032453 |  | + |  | 108.98±5.79  | 91.94±5.13   | 113.49±4.50  | 126.54±2.87  | 134.39±6.44  | 129.88±6.81  | 117.89±6.40  | 108.29±3.36  |
| FBgn0032643 |  | + |  | 32.82±1.25   | 39.16±0.57   | 38.31±4.71   | 39.74±1.58   | 45.84±2.18   | 44.97±3.55   | 43.10±1.29   | 35.62±2.08   |
| FBgn0032913 |  | + |  | 107.42±31.46 | 143.20±37.50 | 106.20±13.33 | 113.97±15.94 | 188.64±8.13  | 166.48±11.40 | 91.58±13.80  | 109.88±16.88 |
| FBgn0033100 |  | + |  | 28.27±1.76   | 34.86±3.23   | 27.85±1.33   | 37.80±3.46   | 42.83±4.74   | 38.62±5.86   | 39.06±0.35   | 31.96±1.34   |

|             |  |   |  |               |               |              |              |               |               |               |              |
|-------------|--|---|--|---------------|---------------|--------------|--------------|---------------|---------------|---------------|--------------|
| FBgn0033339 |  | + |  | 23.58±1.23    | 23.88±1.22    | 24.74±1.39   | 24.90±0.74   | 29.17±1.22    | 27.59±1.41    | 25.69±1.40    | 22.67±1.28   |
| FBgn0033351 |  | + |  | 25.00±1.68    | 23.51±2.51    | 21.20±1.44   | 26.76±0.75   | 29.91±0.49    | 30.05±2.99    | 30.26±1.11    | 24.83±3.48   |
| FBgn0033468 |  | + |  | 11.26±0.83    | 12.25±1.27    | 10.44±1.08   | 13.39±0.48   | 14.21±0.79    | 14.29±1.51    | 13.70±0.81    | 12.31±0.81   |
| FBgn0033518 |  | + |  | 33.03±8.24    | 22.44±5.52    | 22.05±3.06   | 23.87±3.07   | 29.50±7.02    | 51.21±14.30   | 29.10±3.62    | 27.05±3.73   |
| FBgn0033624 |  | + |  | 273.33±10.65  | 246.88±14.96  | 244.85±11.23 | 267.91±13.43 | 293.17±13.58  | 289.84±28.25  | 250.75±3.63   | 283.02±5.16  |
| FBgn0033663 |  | + |  | 251.25±25.82  | 283.84±17.12  | 279.05±32.20 | 292.13±11.21 | 343.08±1.33   | 342.25±34.90  | 353.02±5.75   | 253.14±11.38 |
| FBgn0033683 |  | + |  | 56.27±7.98    | 54.76±3.88    | 55.68±1.64   | 58.02±1.21   | 66.83±1.71    | 68.11±1.89    | 56.16±4.43    | 65.98±5.27   |
| FBgn0033906 |  | + |  | 207.23±16.50  | 207.06±13.85  | 219.26±6.83  | 222.84±9.14  | 268.53±2.79   | 247.65±17.07  | 218.84±15.09  | 216.80±9.19  |
| FBgn0034058 |  | + |  | 18.40±0.86    | 18.91±1.06    | 15.68±0.91   | 17.41±0.51   | 20.84±1.59    | 21.28±1.72    | 17.59±1.40    | 16.95±0.61   |
| FBgn0034059 |  | + |  | 13.45±1.08    | 15.77±0.80    | 14.12±0.39   | 14.65±0.34   | 17.05±1.05    | 18.23±2.99    | 17.83±0.77    | 14.50±1.12   |
| FBgn0034158 |  | + |  | 9.69±1.32     | 10.07±1.10    | 9.25±0.05    | 8.38±0.74    | 7.71±0.33     | 21.01±2.58    | 9.47±1.28     | 9.35±1.00    |
| FBgn0035089 |  | + |  | 208.79±23.90  | 151.03±51.97  | 187.37±33.93 | 207.00±9.96  | 246.69±16.75  | 284.19±24.89  | 262.58±54.86  | 179.01±10.30 |
| FBgn0035121 |  | + |  | 81.58±3.67    | 87.43±5.69    | 90.53±8.45   | 90.99±3.87   | 109.51±3.27   | 108.30±11.07  | 110.01±7.14   | 79.53±4.71   |
| FBgn0035247 |  | + |  | 10.68±0.69    | 11.37±0.33    | 12.14±0.98   | 12.25±1.06   | 12.74±0.89    | 13.48±0.90    | 12.08±0.67    | 10.55±0.83   |
| FBgn0035372 |  | + |  | 15.25±0.20    | 14.34±1.28    | 17.98±0.74   | 16.71±1.01   | 18.19±1.32    | 17.83±1.19    | 15.85±0.57    | 16.44±0.23   |
| FBgn0035375 |  | + |  | 23.49±2.25    | 27.44±1.94    | 27.53±2.12   | 22.40±0.34   | 31.49±2.43    | 29.70±2.54    | 25.20±0.57    | 25.86±2.18   |
| FBgn0035427 |  | + |  | 68.37±16.07   | 59.79±28.06   | 79.20±15.23  | 71.18±2.50   | 93.06±17.34   | 127.56±11.66  | 100.60±19.46  | 75.30±1.10   |
| FBgn0035630 |  | + |  | 120.64±4.19   | 135.37±4.77   | 127.17±6.63  | 127.28±3.18  | 140.12±3.53   | 154.33±11.68  | 150.20±7.14   | 126.86±12.13 |
| FBgn0036262 |  | + |  | 110.15±29.71  | 97.03±26.59   | 102.56±17.59 | 127.79±6.73  | 215.51±54.12  | 170.05±2.11   | 133.32±48.93  | 127.29±8.40  |
| FBgn0036271 |  | + |  | 40.12±1.81    | 26.80±5.56    | 25.54±2.47   | 25.58±1.89   | 37.44±1.32    | 43.26±4.82    | 28.71±2.94    | 20.96±2.72   |
| FBgn0036290 |  | + |  | 33.41±0.58    | 39.85±0.99    | 53.97±1.36   | 45.54±2.70   | 46.18±1.27    | 56.62±2.03    | 47.79±1.61    | 34.64±1.46   |
| FBgn0036394 |  | + |  | 104.87±18.44  | 101.48±12.87  | 101.30±15.39 | 47.22±10.09  | 239.25±13.93  | 71.63±6.11    | 74.32±8.91    | 163.57±20.08 |
| FBgn0036589 |  | + |  | 47.51±9.65    | 56.66±6.10    | 51.57±11.70  | 52.26±9.96   | 71.43±30.96   | 133.17±46.37  | 104.61±36.02  | 25.75±5.05   |
| FBgn0036662 |  | + |  | 7.46±0.72     | 9.80±1.11     | 8.56±1.16    | 8.87±0.84    | 10.87±0.42    | 10.65±1.26    | 9.51±0.26     | 8.49±0.09    |
| FBgn0036688 |  | + |  | 4.75±0.43     | 3.73±0.37     | 4.71±0.35    | 4.88±0.42    | 4.73±0.56     | 6.99±0.10     | 5.95±0.48     | 4.29±0.23    |
| FBgn0036695 |  | + |  | 8.16±0.56     | 8.25±0.43     | 10.01±0.89   | 8.53±0.13    | 10.37±0.85    | 10.18±0.62    | 9.47±0.48     | 9.29±0.60    |
| FBgn0036919 |  | + |  | 37.53±3.34    | 39.28±4.11    | 40.96±3.92   | 40.72±1.96   | 47.96±0.94    | 49.02±3.08    | 46.79±0.53    | 37.86±1.32   |
| FBgn0036967 |  | + |  | 28.17±1.59    | 29.31±0.41    | 28.63±0.30   | 29.98±1.19   | 36.01±1.69    | 29.45±0.34    | 30.02±0.33    | 29.89±2.00   |
| FBgn0037652 |  | + |  | 24.54±1.50    | 26.64±0.27    | 26.25±1.87   | 29.06±0.73   | 29.42±1.29    | 31.86±1.46    | 31.24±1.75    | 25.19±1.63   |
| FBgn0037672 |  | + |  | 21.94±4.41    | 27.05±8.68    | 30.32±5.44   | 24.28±2.85   | 38.01±3.99    | 36.61±5.92    | 26.64±4.63    | 31.00±1.90   |
| FBgn0037842 |  | + |  | 27.71±2.67    | 29.00±3.90    | 29.21±0.72   | 31.02±2.67   | 45.54±1.55    | 33.95±4.36    | 34.55±2.80    | 25.35±0.23   |
| FBgn0037900 |  | + |  | 10.29±0.71    | 8.31±0.18     | 9.28±0.81    | 8.45±0.35    | 10.57±0.74    | 10.89±1.06    | 9.43±0.52     | 9.25±0.66    |
| FBgn0038009 |  | + |  | 661.50±134.86 | 438.20±147.69 | 409.72±70.40 | 549.11±54.71 | 650.25±90.18  | 1046.58±30.60 | 627.87±110.09 | 559.66±76.44 |
| FBgn0038160 |  | + |  | 40.63±4.99    | 44.69±7.71    | 52.89±3.60   | 51.71±5.53   | 67.13±5.60    | 71.84±10.78   | 36.04±8.27    | 59.06±11.04  |
| FBgn0038312 |  | + |  | 11.78±2.02    | 12.97±3.46    | 16.34±3.35   | 14.58±1.15   | 17.81±1.98    | 21.52±5.87    | 16.22±2.24    | 14.69±1.00   |
| FBgn0038868 |  | + |  | 30.01±2.06    | 29.79±1.61    | 29.97±0.69   | 32.79±0.52   | 33.85±1.96    | 38.35±2.89    | 34.91±0.23    | 30.27±0.56   |
| FBgn0038950 |  | + |  | 25.59±1.48    | 25.51±1.21    | 29.12±2.36   | 28.84±0.59   | 31.51±0.82    | 35.28±0.72    | 30.38±0.57    | 26.38±1.66   |
| FBgn0039068 |  | + |  | 15.46±0.51    | 13.38±0.28    | 12.95±1.37   | 14.91±0.16   | 15.76±0.38    | 17.93±0.25    | 14.89±0.85    | 15.16±1.15   |
| FBgn0039175 |  | + |  | 16.84±0.56    | 18.31±1.20    | 17.53±1.35   | 20.53±0.73   | 20.96±0.76    | 22.21±1.83    | 21.33±0.65    | 17.25±0.85   |
| FBgn0039249 |  | + |  | 10.57±0.22    | 9.80±0.63     | 11.76±0.42   | 10.62±0.31   | 11.59±0.18    | 12.51±0.82    | 9.68±0.41     | 12.24±0.87   |
| FBgn0039303 |  | + |  | 44.88±1.32    | 51.57±0.63    | 50.45±5.42   | 46.75±1.02   | 56.92±1.75    | 59.05±5.89    | 53.59±2.78    | 45.86±1.67   |
| FBgn0039562 |  | + |  | 131.86±13.20  | 161.89±5.63   | 127.53±22.99 | 145.86±17.05 | 197.21±17.46  | 182.86±36.76  | 206.42±22.09  | 134.57±7.21  |
| FBgn0039566 |  | + |  | 7.96±0.54     | 7.42±0.22     | 8.31±0.21    | 8.70±0.73    | 9.31±0.37     | 8.59±1.10     | 8.25±0.51     | 8.42±0.68    |
| FBgn0039776 |  | + |  | 15.75±2.51    | 14.71±2.09    | 19.57±2.28   | 18.17±2.51   | 20.60±1.70    | 25.37±3.67    | 23.01±0.64    | 16.12±0.87   |
| FBgn0040717 |  | + |  | 467.30±74.79  | 415.71±62.71  | 436.07±61.19 | 591.20±82.13 | 732.46±135.51 | 725.61±197.57 | 492.16±13.72  | 259.40±73.95 |

|             |  |   |   |               |               |                |              |                |               |                |                |
|-------------|--|---|---|---------------|---------------|----------------|--------------|----------------|---------------|----------------|----------------|
| FBgn0042094 |  | + |   | 38.17±3.52    | 48.63±3.11    | 38.99±2.85     | 44.87±3.15   | 61.33±2.98     | 53.02±6.63    | 48.40±4.09     | 44.21±2.29     |
| FBgn0045866 |  | + |   | 165.82±13.80  | 152.51±13.36  | 168.20±8.46    | 169.85±5.90  | 189.19±5.96    | 196.86±11.12  | 181.14±7.84    | 161.48±9.84    |
| FBgn0046875 |  | + |   | 57.69±19.86   | 54.60±19.79   | 70.72±3.82     | 77.52±11.94  | 118.38±2.79    | 125.79±42.22  | 117.97±19.13   | 43.67±8.10     |
| FBgn0047135 |  | + |   | 451.95±68.90  | 472.88±98.06  | 502.12±32.21   | 517.93±48.86 | 603.98±34.26   | 649.93±49.67  | 614.23±27.83   | 470.13±16.43   |
| FBgn0050029 |  | + |   | 601.22±106.88 | 374.96±160.16 | 170.73±58.91   | 309.82±19.33 | 1547.77±324.18 | 409.08±19.64  | 85.37±33.60    | 316.10±56.52   |
| FBgn0050291 |  | + |   | 17.04±1.65    | 17.20±0.98    | 19.81±1.18     | 18.82±0.73   | 20.72±0.54     | 24.30±1.68    | 20.01±0.54     | 18.17±0.29     |
| FBgn0052369 |  | + |   | 11.15±0.67    | 10.88±0.89    | 11.15±0.45     | 10.19±1.37   | 19.25±1.88     | 10.83±0.75    | 11.11±0.81     | 11.31±0.59     |
| FBgn0062928 |  | + |   | 31.44±0.37    | 21.30±1.48    | 20.13±1.51     | 25.59±2.87   | 30.68±2.17     | 31.31±3.61    | 20.81±0.94     | 31.11±3.01     |
| FBgn0085307 |  | + |   | 64.24±36.44   | 81.06±22.64   | 152.52±23.38   | 149.48±49.98 | 181.55±35.48   | 406.27±58.93  | 96.90±7.92     | 91.37±28.13    |
| FBgn0085377 |  | + |   | 8.36±0.98     | 7.04±1.14     | 8.41±0.61      | 8.18±0.84    | 11.65±0.69     | 8.25±0.16     | 9.58±0.78      | 9.17±0.95      |
| FBgn0086757 |  | + |   | 8.06±0.51     | 8.39±0.85     | 8.87±0.69      | 7.63±0.49    | 10.43±1.10     | 9.53±0.34     | 7.64±0.10      | 8.90±0.53      |
| FBgn0259143 |  | + |   | 33.84±1.66    | 30.48±1.46    | 31.41±0.44     | 30.56±1.58   | 42.18±1.45     | 30.89±0.24    | 27.08±1.57     | 29.65±1.86     |
| FBgn0259482 |  | + |   | 18.53±0.77    | 16.18±1.07    | 17.74±0.40     | 18.88±2.49   | 19.17±1.58     | 20.96±1.44    | 16.99±0.33     | 19.70±1.01     |
| FBgn0260484 |  | + |   | 29.56±2.98    | 29.32±3.54    | 33.36±2.82     | 38.10±2.32   | 33.10±1.29     | 38.20±5.34    | 40.22±3.87     | 30.86±1.86     |
| FBgn0261270 |  | + |   | 34.73±1.41    | 35.50±1.44    | 34.53±2.92     | 38.00±3.21   | 41.65±2.31     | 37.45±2.75    | 39.72±2.05     | 38.03±3.78     |
| FBgn0261279 |  | + |   | 25.49±1.68    | 25.00±2.25    | 30.12±2.51     | 26.09±1.18   | 28.57±1.64     | 30.66±2.17    | 27.17±1.83     | 25.41±0.58     |
| FBgn0262125 |  | + |   | 54.03±1.32    | 54.95±4.87    | 56.48±5.16     | 58.17±1.42   | 62.86±1.20     | 66.15±4.46    | 62.72±0.88     | 50.42±1.65     |
| FBgn0262126 |  | + |   | 26.80±1.21    | 26.48±2.22    | 27.16±2.71     | 25.69±0.19   | 32.17±1.20     | 30.89±2.15    | 30.43±1.34     | 24.09±1.15     |
| FBgn0262146 |  | + |   | 179.89±33.23  | 95.73±12.45   | 96.39±11.31    | 86.07±17.04  | 175.75±49.12   | 159.82±19.57  | 173.83±29.56   | 125.04±5.01    |
| FBgn0262954 |  | + |   | 70.31±3.68    | 66.78±8.04    | 73.82±9.05     | 74.13±3.32   | 73.66±6.27     | 87.68±4.80    | 73.86±4.75     | 83.48±4.54     |
| FBgn0263256 |  | + |   | 7.81±1.86     | 6.72±1.52     | 7.07±0.54      | 7.69±0.86    | 19.84±1.45     | 6.03±0.48     | 6.30±0.67      | 5.03±0.40      |
| FBgn0263852 |  | + |   | 117.77±7.16   | 124.86±7.29   | 133.85±14.30   | 131.70±1.08  | 148.68±9.63    | 153.70±12.70  | 156.38±1.41    | 124.95±13.35   |
| FBgn0263977 |  | + |   | 139.54±7.86   | 134.55±6.07   | 143.80±7.21    | 149.27±4.29  | 155.78±2.85    | 153.11±3.53   | 152.53±4.79    | 148.41±7.39    |
| FBgn0264978 |  | + |   | 16.26±0.54    | 15.68±0.67    | 16.30±1.61     | 16.78±0.52   | 17.52±0.49     | 19.47±0.46    | 18.47±0.39     | 15.94±0.25     |
| FBgn0266261 |  | + |   | 391.21±110.69 | 299.22±101.21 | 379.80±41.78   | 353.43±82.76 | 484.39±76.28   | 598.30±78.37  | 253.90±42.76   | 320.83±71.16   |
| FBgn0267365 |  | + |   | 17.85±1.13    | 17.47±1.71    | 18.90±1.39     | 19.02±0.86   | 20.85±0.56     | 20.37±1.15    | 18.25±0.14     | 20.04±0.32     |
| FBgn0267378 |  | + |   | 46.01±2.59    | 46.38±2.86    | 50.86±4.51     | 42.77±3.35   | 50.80±1.93     | 54.45±4.35    | 46.57±3.29     | 46.02±2.88     |
| FBgn0267976 |  | + |   | 77.96±4.65    | 79.58±4.04    | 81.85±2.70     | 86.87±3.21   | 92.38±4.67     | 91.99±3.62    | 96.48±4.97     | 75.24±3.23     |
| FBgn0283427 |  | + |   | 48.37±17.27   | 76.46±10.34   | 44.50±7.89     | 64.75±3.20   | 104.79±1.67    | 89.49±27.57   | 84.04±5.75     | 56.69±8.94     |
| FBgn0000017 |  |   | + | 7.24±0.91     | 7.47±1.40     | 8.63±0.41      | 7.99±0.56    | 6.99±0.41      | 7.19±1.41     | 10.04±0.84     | 8.57±0.95      |
| FBgn0002543 |  |   | + | 5.08±0.43     | 5.27±1.15     | 5.58±0.43      | 5.64±0.53    | 4.99±0.57      | 5.31±1.14     | 6.92±1.23      | 6.35±0.56      |
| FBgn0003390 |  |   | + | 7.64±0.77     | 6.57±0.96     | 7.78±0.91      | 8.52±0.59    | 7.34±0.07      | 7.19±1.95     | 9.53±0.80      | 10.59±0.83     |
| FBgn0003892 |  |   | + | 4.59±0.13     | 4.17±1.05     | 5.00±0.67      | 4.88±0.77    | 4.80±0.42      | 4.42±0.83     | 6.27±0.74      | 5.82±0.85      |
| FBgn0004108 |  |   | + | 12.20±1.58    | 10.96±2.31    | 13.21±0.90     | 12.78±1.49   | 11.60±0.33     | 10.50±2.70    | 16.37±2.74     | 17.39±2.89     |
| FBgn0004839 |  |   | + | 5.54±0.75     | 4.94±1.03     | 6.34±0.75      | 5.45±0.83    | 5.12±0.09      | 5.16±1.21     | 7.16±0.96      | 7.47±1.40      |
| FBgn0010379 |  |   | + | 25.39±3.17    | 24.78±3.97    | 26.51±1.67     | 23.48±1.37   | 20.17±0.42     | 22.62±3.59    | 24.91±3.32     | 59.68±5.68     |
| FBgn0010422 |  |   | + | 19.57±0.78    | 18.68±0.68    | 19.42±1.37     | 21.41±1.99   | 18.87±0.38     | 20.66±2.67    | 21.30±1.58     | 24.13±1.67     |
| FBgn0016675 |  |   | + | 42.84±8.84    | 52.93±6.00    | 76.04±12.15    | 40.25±10.37  | 76.79±3.18     | 53.85±13.07   | 61.98±8.85     | 113.85±14.74   |
| FBgn0022710 |  |   | + | 4.13±0.38     | 4.10±0.51     | 4.24±0.34      | 4.31±0.35    | 3.99±0.05      | 3.56±0.60     | 8.89±0.75      | 4.13±0.22      |
| FBgn0029990 |  |   | + | 839.21±118.61 | 861.32±126.39 | 1038.63±113.20 | 814.38±14.78 | 812.41±31.45   | 803.77±182.74 | 1318.11±122.23 | 1220.43±140.98 |
| FBgn0030097 |  |   | + | 52.84±25.14   | 35.88±14.16   | 27.29±10.37    | 16.10±2.82   | 14.46±3.01     | 28.14±13.62   | 104.48±47.50   | 81.58±15.98    |
| FBgn0030545 |  |   | + | 24.58±1.60    | 23.87±2.09    | 26.04±1.81     | 25.84±1.86   | 25.19±1.07     | 27.22±2.94    | 28.38±0.74     | 30.07±2.09     |
| FBgn0031381 |  |   | + | 113.08±16.99  | 102.40±20.45  | 105.42±7.10    | 132.46±5.80  | 110.91±10.24   | 116.35±21.46  | 146.17±12.66   | 154.18±9.34    |
| FBgn0031535 |  |   | + | 22.95±1.69    | 30.62±10.21   | 27.92±7.81     | 28.58±4.55   | 28.75±6.11     | 26.83±0.59    | 55.90±17.27    | 36.15±8.43     |
| FBgn0032474 |  |   | + | 35.74±6.04    | 20.26±4.32    | 22.07±2.74     | 22.01±3.16   | 18.64±1.87     | 26.12±8.98    | 38.48±6.84     | 39.01±3.59     |

|             |  |  |   |              |              |              |              |              |              |              |              |
|-------------|--|--|---|--------------|--------------|--------------|--------------|--------------|--------------|--------------|--------------|
| FBgn0032476 |  |  | + | 6.86±0.60    | 6.95±0.48    | 7.19±0.33    | 7.38±0.70    | 5.20±0.48    | 6.22±1.16    | 12.02±0.92   | 6.52±0.46    |
| FBgn0032881 |  |  | + | 19.42±0.90   | 19.35±1.94   | 18.70±0.53   | 19.97±1.04   | 19.99±0.44   | 18.33±1.36   | 29.91±1.47   | 20.98±0.91   |
| FBgn0032946 |  |  | + | 18.82±2.80   | 23.97±5.59   | 18.10±1.06   | 19.73±1.26   | 19.17±1.28   | 14.82±0.66   | 22.15±1.80   | 64.67±7.94   |
| FBgn0033065 |  |  | + | 13.71±2.00   | 12.86±4.87   | 7.63±1.79    | 6.27±0.40    | 10.34±1.28   | 7.57±0.65    | 29.59±9.66   | 21.20±4.76   |
| FBgn0033379 |  |  | + | 8.08±0.50    | 7.70±0.57    | 8.62±0.38    | 8.07±0.40    | 8.24±0.05    | 8.53±0.89    | 9.74±0.87    | 9.35±1.42    |
| FBgn0034070 |  |  | + | 2.41±0.39    | 2.49±0.33    | 2.95±0.39    | 2.73±0.32    | 2.19±0.08    | 2.21±0.58    | 4.88±0.71    | 3.46±0.61    |
| FBgn0034534 |  |  | + | 59.76±5.73   | 52.66±4.14   | 57.64±4.46   | 64.00±3.55   | 57.91±5.10   | 60.24±3.37   | 77.86±8.82   | 65.57±5.89   |
| FBgn0034741 |  |  | + | 38.97±9.25   | 37.04±6.90   | 47.22±2.83   | 35.36±9.70   | 38.21±7.15   | 32.68±12.33  | 54.26±8.77   | 68.40±6.72   |
| FBgn0035806 |  |  | + | 23.16±2.98   | 29.02±1.01   | 20.05±1.88   | 21.02±0.85   | 21.83±1.47   | 24.38±3.11   | 36.23±4.97   | 25.25±3.38   |
| FBgn0035829 |  |  | + | 30.52±1.58   | 28.09±3.06   | 30.85±1.85   | 30.54±2.82   | 34.49±1.09   | 27.47±2.32   | 37.54±0.79   | 37.21±8.28   |
| FBgn0036393 |  |  | + | 48.77±16.50  | 38.77±8.27   | 25.35±3.39   | 53.58±22.92  | 31.06±2.67   | 82.84±32.75  | 59.22±5.45   | 104.84±10.31 |
| FBgn0036516 |  |  | + | 45.07±4.61   | 45.21±9.34   | 49.19±6.91   | 45.71±3.87   | 39.10±1.39   | 48.85±9.03   | 73.12±4.70   | 45.41±4.93   |
| FBgn0037472 |  |  | + | 17.62±0.85   | 16.92±3.27   | 19.01±1.55   | 19.42±2.05   | 17.81±0.86   | 21.16±3.15   | 23.30±2.66   | 20.99±2.42   |
| FBgn0039682 |  |  | + | 281.08±33.60 | 421.11±78.44 | 356.93±24.33 | 456.72±39.97 | 412.93±11.74 | 406.04±14.20 | 604.90±81.19 | 497.29±42.34 |
| FBgn0039798 |  |  | + | 11.28±1.85   | 10.16±4.37   | 9.82±2.02    | 15.25±1.98   | 11.88±2.49   | 7.14±0.53    | 13.27±4.67   | 38.93±3.21   |
| FBgn0041097 |  |  | + | 2.53±0.40    | 2.41±0.21    | 2.71±0.20    | 2.88±0.44    | 2.69±0.25    | 2.28±0.55    | 3.22±0.51    | 3.63±0.56    |
| FBgn0051778 |  |  | + | 77.70±21.79  | 69.75±17.75  | 82.72±1.51   | 66.60±3.70   | 77.03±9.40   | 82.08±28.61  | 97.36±20.49  | 119.46±9.96  |
| FBgn0259244 |  |  | + | 7.12±1.06    | 6.31±0.77    | 7.29±0.65    | 7.04±0.90    | 6.93±0.32    | 6.50±1.39    | 8.27±1.08    | 9.54±1.58    |
| FBgn0261649 |  |  | + | 3.75±0.54    | 3.38±0.67    | 3.75±0.39    | 3.95±0.49    | 3.79±0.09    | 3.69±0.87    | 4.94±0.82    | 4.77±0.86    |
| FBgn0262738 |  |  | + | 7.13±0.95    | 5.58±0.46    | 6.18±0.26    | 6.78±0.74    | 6.99±0.84    | 6.40±1.50    | 7.98±0.54    | 8.54±1.22    |
| FBgn0263219 |  |  | + | 1.69±0.47    | 1.53±0.24    | 1.89±0.16    | 1.97±0.36    | 1.41±0.13    | 1.57±0.49    | 2.50±0.52    | 2.61±0.59    |
| FBgn0264305 |  |  | + | 5.05±0.98    | 4.27±0.48    | 4.14±0.37    | 3.86±0.41    | 3.73±0.13    | 4.18±0.70    | 8.42±1.75    | 4.78±0.23    |

\*Annotation for genes taken from the *Drosophila melanogaster* genome strain Oregon R, version: dmel\_r6.15\_FB2017\_02. Gene rows marked with a “+” indicate that the gene had significantly lower expression in the four high lethality lines at the P<0.01 level of significance, when compared to the indicated lower lethality group.

† All Low represents the comparison of the FL3#2 crosses for the four high lethality lines (153H, 195H, 399H, and 911H) to all four low lethality lines (350L, 492L, 317L, and 646L). Gene rows marked with a “+” indicate that the gene had significantly lower expression in the four high lethality lines at the P<0.01 level of significance.

‡ Low tTA represents the comparison of the FL3#2 crosses for the four high lethality lines (153H, 195H, 399H, and 911H) to the two low lethality lines that had lower expression levels of tTA (350L and 492L).

\*\* High tTA represents the comparison of the FL3#2 crosses for the four high lethality lines (153H, 195H, 399H, and 911H) to the two low lethality lines that had higher expression levels of tTA (317L and 646L).

†† Indicates the DGRP line to which the FL3#2 was crossed. DGRP lines followed by “H” had high levels of lethality, DGRP lines followed by “L” had low levels of lethality. Values within columns indicate the average RPKM value ± standard error of the mean.
