# Supplementary material
Source: publisher figshare collection journal article supplement (https://gsajournals.figshare.com/articles/dataset/_/11771622)
Supplement: Supplementary file 11 [file 1]

Table S7: Expression levels of genes identified as upregulated in DGRP lines crossed to the FL3#2 tTA overexpressing line that had high lethality when compared to DGRP lines crossed to the FL3#2 tTA overexpressing line that had low lethality, and also when compared to the DGRP lines crossed to the FL3#2 tTA overexpressing line that had low lethality when separated into two groups: those with higher expression levels of tTA, and those with lower expression levels of tTAV

| GENE*       | ALL low <sup>†</sup> | Low tTA <sup>‡</sup> | High tTA <sup>**</sup> | 153H <sup>††</sup> | 195H         | 399H         | 911H         | 350L         | 492L         | 317L         | 646L         |
|-------------|----------------------|----------------------|------------------------|--------------------|--------------|--------------|--------------|--------------|--------------|--------------|--------------|
| FBgn0003463 | +                    | +                    | +                      | 13.14±1.61         | 12.46±2.12   | 12.32±0.32   | 12.98±1.16   | 9.54±0.35    | 9.91±1.03    | 9.46±0.43    | 10.85±0.81   |
| FBgn0005695 | +                    | +                    | +                      | 9.43±1.20          | 7.56±0.71    | 9.30±0.77    | 8.70±0.75    | 7.07±0.30    | 7.03±0.70    | 7.39±0.91    | 6.83±0.30    |
| FBgn0015277 | +                    | +                    | +                      | 6.03±0.66          | 6.09±0.64    | 6.19±0.13    | 5.99±0.51    | 4.47±0.27    | 4.93±0.82    | 4.83±0.37    | 5.60±0.14    |
| FBgn0015600 | +                    | +                    | +                      | 13.34±0.82         | 21.68±3.03   | 18.86±1.30   | 12.60±1.16   | 10.59±0.56   | 11.08±0.92   | 8.89±0.51    | 12.15±0.78   |
| FBgn0023520 | +                    | +                    | +                      | 6.92±1.08          | 8.87±1.35    | 15.60±0.59   | 4.66±0.12    | 4.23±0.16    | 5.48±0.86    | 5.27±0.54    | 5.91±0.79    |
| FBgn0024248 | +                    | +                    | +                      | 14.58±2.55         | 12.91±1.81   | 13.77±0.79   | 13.56±0.76   | 10.93±0.35   | 10.70±0.98   | 10.22±0.88   | 12.25±0.47   |
| FBgn0024329 | +                    | +                    | +                      | 13.52±1.35         | 13.33±1.70   | 15.54±0.76   | 14.79±0.75   | 10.74±0.44   | 11.06±1.45   | 11.16±0.68   | 11.97±0.57   |
| FBgn0029006 | +                    | +                    | +                      | 12.96±1.54         | 13.05±1.17   | 13.58±0.35   | 41.44±1.01   | 10.26±0.45   | 10.86±1.49   | 11.75±1.59   | 11.90±0.46   |
| FBgn0030576 | +                    | +                    | +                      | 5.71±1.20          | 5.50±0.79    | 6.70±1.23    | 5.83±0.93    | 3.65±0.45    | 4.29±0.72    | 4.56±0.76    | 4.31±0.17    |
| FBgn0032079 | +                    | +                    | +                      | 6.84±3.07          | 8.02±2.43    | 6.70±1.80    | 6.50±0.93    | 3.08±0.56    | 3.27±0.44    | 3.31±0.44    | 4.84±0.61    |
| FBgn0034447 | +                    | +                    | +                      | 3.61±0.15          | 3.95±0.51    | 4.87±0.15    | 64.73±4.12   | 4.35±0.47    | 3.52±0.02    | 4.44±0.68    | 4.43±0.27    |
| FBgn0034480 | +                    | +                    | +                      | 16.44±4.67         | 22.61±5.06   | 8.15±2.84    | 17.76±3.81   | 7.49±1.77    | 5.58±1.49    | 3.81±1.56    | 8.29±1.54    |
| FBgn0035877 | +                    | +                    | +                      | 20.90±5.01         | 18.42±3.79   | 21.80±1.16   | 21.79±2.11   | 13.06±1.44   | 16.78±2.76   | 16.74±1.30   | 12.83±1.09   |
| FBgn0036059 | +                    | +                    | +                      | 42.01±3.79         | 37.74±2.61   | 37.06±0.60   | 38.82±3.82   | 29.75±1.37   | 32.11±3.99   | 29.35±0.87   | 34.42±1.10   |
| FBgn0036152 | +                    | +                    | +                      | 15.31±1.85         | 9.80±1.76    | 9.43±1.04    | 10.42±0.74   | 7.52±0.45    | 7.59±0.17    | 7.99±0.82    | 7.91±0.49    |
| FBgn0037445 | +                    | +                    | +                      | 9.24±1.44          | 8.06±0.71    | 9.06±0.54    | 8.42±0.51    | 6.53±0.15    | 6.75±0.96    | 6.88±0.65    | 7.76±0.26    |
| FBgn0038842 | +                    | +                    | +                      | 69.92±1.39         | 66.55±2.19   | 72.19±1.28   | 65.86±6.05   | 53.91±0.06   | 56.08±4.66   | 52.94±1.87   | 58.75±1.26   |
| FBgn0039728 | +                    | +                    | +                      | 6.69±0.88          | 5.39±1.23    | 6.10±0.53    | 7.10±0.51    | 4.42±0.22    | 4.86±0.15    | 4.62±0.56    | 4.60±0.49    |
| FBgn0050460 | +                    | +                    | +                      | 8.38±0.35          | 6.76±0.88    | 8.26±0.99    | 6.88±0.57    | 5.67±0.14    | 6.17±0.57    | 5.63±0.25    | 6.13±0.25    |
| FBgn0051729 | +                    | +                    | +                      | 29.69±3.87         | 28.17±3.04   | 30.01±1.34   | 27.67±1.28   | 21.74±0.82   | 24.28±1.25   | 23.73±2.06   | 24.34±1.87   |
| FBgn0260866 | +                    | +                    | +                      | 16.27±3.35         | 12.28±1.69   | 13.41±2.20   | 16.99±1.10   | 9.13±1.21    | 9.72±1.24    | 8.36±1.14    | 11.83±0.92   |
| FBgn0261862 | +                    | +                    | +                      | 85.63±18.16        | 94.11±9.33   | 86.43±10.76  | 87.54±1.92   | 65.83±6.58   | 64.09±6.37   | 63.78±4.26   | 73.44±7.38   |
| FBgn0264907 | +                    | +                    | +                      | 6.53±1.17          | 7.47±1.02    | 8.09±1.11    | 5.96±0.32    | 5.06±0.51    | 4.17±0.22    | 5.16±0.65    | 4.42±0.12    |
| FBgn0265512 | +                    | +                    | +                      | 22.25±5.93         | 16.85±2.90   | 24.41±1.34   | 20.08±1.71   | 11.43±2.13   | 12.70±2.48   | 17.23±4.00   | 12.77±2.35   |
| FBgn0265959 | +                    | +                    | +                      | 4.24±0.97          | 3.92±0.52    | 17.55±1.41   | 4.30±0.53    | 3.00±0.21    | 3.41±0.70    | 2.86±0.13    | 4.07±0.34    |
| FBgn9999999 | +                    | +                    | +                      | 801.20±142.70      | 763.86±82.39 | 970.68±98.62 | 872.74±80.46 | 398.12±33.64 | 336.78±88.35 | 501.14±93.60 | 674.13±80.47 |
| FBgn0000370 | +                    | +                    |                        | 487.76±17.21       | 429.57±10.27 | 470.24±12.90 | 436.67±26.34 | 371.91±9.95  | 352.33±31.21 | 381.45±11.67 | 446.40±10.28 |
| FBgn0000414 | +                    | +                    |                        | 8.01±0.79          | 7.85±0.87    | 7.66±0.38    | 8.37±0.70    | 6.25±0.19    | 5.87±1.02    | 6.73±0.63    | 7.96±0.52    |
| FBgn0000536 | +                    | +                    |                        | 17.22±3.11         | 17.55±2.81   | 19.07±2.29   | 18.01±1.75   | 13.40±0.71   | 13.07±2.36   | 16.25±1.97   | 14.77±0.52   |
| FBgn0003169 | +                    | +                    |                        | 19.65±3.01         | 16.82±1.09   | 19.58±1.10   | 17.29±1.94   | 15.08±0.64   | 14.87±1.93   | 16.66±1.47   | 16.30±0.55   |
| FBgn0004133 | +                    | +                    |                        | 16.12±2.08         | 29.71±2.85   | 15.58±1.15   | 15.91±1.22   | 12.63±0.40   | 14.15±2.35   | 15.04±1.53   | 15.79±1.99   |
| FBgn0004395 | +                    | +                    |                        | 14.40±2.66         | 13.12±2.46   | 14.92±1.17   | 14.66±0.97   | 10.05±0.43   | 11.93±2.51   | 12.13±1.13   | 12.62±1.05   |
| FBgn0004509 | +                    | +                    |                        | 17.90±3.35         | 15.63±1.32   | 15.52±1.30   | 15.59±0.36   | 12.57±0.53   | 13.35±1.60   | 15.50±1.37   | 13.92±0.44   |
| FBgn0004910 | +                    | +                    |                        | 39.65±9.08         | 42.84±8.85   | 30.90±0.69   | 37.64±3.26   | 25.06±3.57   | 26.63±2.45   | 31.00±3.53   | 33.75±1.48   |
| FBgn0015011 | +                    | +                    |                        | 32.70±6.63         | 39.34±4.62   | 35.39±6.04   | 31.64±3.97   | 20.13±0.92   | 26.71±7.25   | 27.69±4.94   | 24.69±3.24   |
| FBgn0015295 | +                    | +                    |                        | 7.42±0.60          | 6.99±0.52    | 7.92±0.26    | 6.75±0.53    | 5.67±0.29    | 5.97±0.60    | 6.74±0.71    | 6.36±0.26    |
| FBgn0015513 | +                    | +                    |                        | 9.68±1.24          | 9.54±1.10    | 9.27±0.54    | 9.06±0.20    | 7.33±0.27    | 6.74±0.79    | 7.84±0.88    | 8.21±0.19    |

|             |   |   |  |                |                |                |                |               |               |                |               |
|-------------|---|---|--|----------------|----------------|----------------|----------------|---------------|---------------|----------------|---------------|
| FBgn0015589 | + | + |  | 7.75±0.97      | 7.49±0.82      | 7.99±0.42      | 7.63±0.33      | 6.43±0.36     | 6.09±0.58     | 7.06±0.77      | 6.67±0.54     |
| FBgn0015714 | + | + |  | 36.64±5.05     | 28.84±0.33     | 24.39±3.40     | 23.68±2.00     | 7.33±1.64     | 20.56±2.07    | 26.04±6.46     | 20.84±1.40    |
| FBgn0015793 | + | + |  | 15.89±1.88     | 16.00±1.28     | 14.76±0.12     | 14.98±0.31     | 12.74±0.47    | 12.18±2.07    | 13.17±1.03     | 13.42±0.92    |
| FBgn0016081 | + | + |  | 10.59±1.35     | 10.35±1.19     | 9.02±0.34      | 8.33±0.34      | 7.34±0.15     | 7.43±1.15     | 8.73±0.89      | 8.91±0.27     |
| FBgn0025681 | + | + |  | 15.37±1.07     | 14.76±0.91     | 15.84±0.47     | 14.76±0.90     | 11.94±0.45    | 12.74±1.07    | 13.56±1.16     | 13.85±0.62    |
| FBgn0026323 | + | + |  | 23.78±4.34     | 21.99±3.50     | 23.48±1.33     | 20.88±1.29     | 16.64±1.00    | 17.86±2.31    | 17.86±1.17     | 21.60±1.21    |
| FBgn0027529 | + | + |  | 22.83±1.92     | 22.89±2.05     | 23.12±0.40     | 21.84±1.73     | 17.59±1.07    | 18.95±2.63    | 21.60±1.98     | 20.20±1.28    |
| FBgn0027601 | + | + |  | 140.34±31.44   | 120.41±7.00    | 125.17±17.28   | 135.91±0.93    | 85.67±9.23    | 90.21±27.05   | 104.42±8.47    | 108.39±17.87  |
| FBgn0029881 | + | + |  | 6.36±0.86      | 5.78±0.48      | 13.78±1.40     | 5.42±0.74      | 5.02±0.19     | 4.77±0.38     | 5.29±0.30      | 5.21±0.18     |
| FBgn0030286 | + | + |  | 7.08±1.01      | 7.01±0.94      | 6.53±0.44      | 6.45±0.36      | 5.38±0.51     | 5.10±0.67     | 5.56±0.79      | 6.28±0.51     |
| FBgn0030808 | + | + |  | 7.69±1.16      | 8.32±1.04      | 7.26±0.56      | 7.35±0.24      | 5.44±0.23     | 6.08±0.60     | 6.87±0.74      | 6.81±0.93     |
| FBgn0030960 | + | + |  | 11.43±2.14     | 9.46±1.15      | 10.56±0.67     | 9.76±0.43      | 7.51±0.36     | 6.86±1.02     | 9.24±2.10      | 10.00±0.90    |
| FBgn0031011 | + | + |  | 24.66±4.20     | 27.87±3.14     | 25.65±2.76     | 22.55±1.94     | 16.93±0.98    | 16.77±1.94    | 19.81±2.99     | 22.99±0.45    |
| FBgn0031249 | + | + |  | 646.74±69.66   | 643.51±178.74  | 678.99±266.82  | 245.87±100.84  | 205.76±60.36  | 124.39±30.45  | 423.76±210.63  | 405.50±42.93  |
| FBgn0031374 | + | + |  | 15.24±1.93     | 14.58±1.30     | 13.83±0.77     | 14.55±0.39     | 10.52±0.86    | 12.34±0.43    | 12.95±0.86     | 12.39±1.30    |
| FBgn0031514 | + | + |  | 8.75±0.84      | 13.41±4.98     | 6.11±0.33      | 5.50±0.93      | 4.33±0.64     | 4.48±0.40     | 6.88±1.86      | 5.67±0.19     |
| FBgn0031695 | + | + |  | 13.31±3.37     | 14.34±4.56     | 11.58±1.16     | 7.71±0.27      | 6.05±1.01     | 6.20±0.87     | 6.43±2.23      | 10.02±0.45    |
| FBgn0031882 | + | + |  | 8.87±0.77      | 9.79±0.97      | 9.30±0.26      | 8.86±0.45      | 6.99±0.18     | 7.80±0.76     | 8.10±1.12      | 8.09±0.67     |
| FBgn0031971 | + | + |  | 507.96±84.16   | 324.78±79.49   | 402.43±81.80   | 406.96±29.49   | 270.85±60.00  | 231.60±9.22   | 239.03±71.23   | 362.27±11.59  |
| FBgn0032006 | + | + |  | 20.31±3.68     | 21.92±3.72     | 18.03±1.41     | 17.60±0.21     | 13.58±1.80    | 13.78±0.88    | 16.08±1.65     | 15.53±2.43    |
| FBgn0032850 | + | + |  | 12.62±1.70     | 16.25±7.22     | 10.29±1.64     | 6.74±0.82      | 5.70±1.44     | 3.76±0.62     | 4.99±1.68      | 8.92±1.21     |
| FBgn0032938 | + | + |  | 18.76±3.76     | 19.21±2.44     | 16.64±0.64     | 15.95±0.63     | 13.42±0.35    | 13.71±2.27    | 16.22±2.17     | 16.36±1.05    |
| FBgn0033205 | + | + |  | 7.59±0.71      | 28.51±5.08     | 20.37±2.11     | 17.99±1.28     | 7.58±1.11     | 6.90±1.04     | 18.71±2.65     | 10.83±1.98    |
| FBgn0034140 | + | + |  | 243.91±61.03   | 214.48±22.58   | 179.77±9.10    | 235.39±18.13   | 79.00±5.65    | 188.82±63.06  | 142.12±9.26    | 180.69±25.17  |
| FBgn0034894 | + | + |  | 18.73±4.81     | 19.88±3.88     | 19.43±2.23     | 16.81±1.21     | 11.02±1.81    | 13.69±1.61    | 15.57±3.98     | 14.09±1.61    |
| FBgn0035154 | + | + |  | 52.34±7.86     | 47.27±1.98     | 19.05±5.18     | 20.11±3.34     | 13.71±2.49    | 20.92±4.15    | 24.13±2.64     | 27.43±8.29    |
| FBgn0035236 | + | + |  | 42.04±6.22     | 41.77±3.89     | 42.85±3.68     | 39.91±2.52     | 29.11±1.78    | 33.33±3.15    | 38.65±5.86     | 33.77±1.96    |
| FBgn0035346 | + | + |  | 16.72±2.62     | 16.17±2.22     | 18.53±1.83     | 14.35±0.45     | 11.51±1.88    | 12.52±0.84    | 14.06±1.83     | 11.81±0.63    |
| FBgn0035896 | + | + |  | 14.17±1.29     | 16.02±1.98     | 14.93±1.07     | 11.86±0.34     | 10.23±0.46    | 10.38±0.90    | 13.56±2.28     | 12.83±0.71    |
| FBgn0035975 | + | + |  | 17.93±3.71     | 19.59±3.37     | 15.06±1.19     | 15.26±1.03     | 11.56±1.07    | 11.94±1.24    | 15.14±3.11     | 12.81±2.66    |
| FBgn0036007 | + | + |  | 64.16±13.96    | 71.57±13.96    | 78.35±13.97    | 71.27±7.24     | 49.13±8.51    | 35.45±2.69    | 53.39±7.76     | 56.90±1.70    |
| FBgn0036024 | + | + |  | 1971.49±310.41 | 1022.06±143.10 | 1688.41±525.12 | 1273.65±405.61 | 846.03±159.70 | 607.81±248.80 | 1238.05±161.64 | 809.53±271.76 |
| FBgn0036257 | + | + |  | 44.89±8.46     | 34.88±5.28     | 44.08±0.64     | 38.25±2.39     | 30.70±2.07    | 31.03±4.20    | 35.42±3.52     | 35.93±1.81    |
| FBgn0036309 | + | + |  | 10.68±2.11     | 11.31±2.06     | 10.66±0.57     | 9.24±0.54      | 7.36±0.69     | 7.79±0.67     | 7.60±1.25      | 9.15±0.29     |
| FBgn0038100 | + | + |  | 103.24±33.13   | 123.07±21.76   | 114.98±8.75    | 93.84±4.81     | 60.22±13.12   | 72.77±9.74    | 84.09±9.96     | 71.85±12.11   |
| FBgn0038237 | + | + |  | 4.67±0.46      | 3.64±0.48      | 5.10±0.50      | 4.19±0.60      | 2.74±0.26     | 3.13±0.17     | 2.93±0.10      | 3.61±0.56     |
| FBgn0038331 | + | + |  | 28.52±2.74     | 26.54±1.50     | 27.88±1.40     | 24.15±2.22     | 22.27±1.42    | 19.99±1.96    | 21.52±1.22     | 24.58±0.53    |
| FBgn0038381 | + | + |  | 15.34±1.10     | 13.80±0.75     | 13.17±0.45     | 15.30±1.82     | 10.38±0.23    | 11.27±1.00    | 10.71±0.44     | 13.63±1.64    |
| FBgn0038638 | + | + |  | 19.19±4.00     | 23.84±6.41     | 21.00±0.87     | 17.13±1.59     | 13.36±1.64    | 13.08±1.45    | 16.88±3.30     | 17.33±2.63    |
| FBgn0038889 | + | + |  | 4.89±0.71      | 4.01±0.31      | 4.03±0.27      | 3.38±0.41      | 3.30±0.18     | 2.71±0.39     | 3.44±0.38      | 3.59±0.18     |
| FBgn0039137 | + | + |  | 6.64±0.76      | 7.06±0.58      | 6.54±0.18      | 6.46±0.73      | 4.91±0.22     | 5.56±0.67     | 5.79±0.65      | 6.41±0.68     |
| FBgn0040068 | + | + |  | 7.54±0.44      | 6.65±0.47      | 44.27±7.72     | 7.16±0.40      | 6.45±0.17     | 6.84±0.78     | 6.99±0.73      | 7.64±0.47     |
| FBgn0050183 | + | + |  | 7.50±0.37      | 6.84±0.28      | 7.77±0.52      | 8.18±0.93      | 5.66±0.40     | 5.42±1.17     | 5.90±0.50      | 7.57±1.05     |
| FBgn0050456 | + | + |  | 9.54±1.45      | 12.72±2.39     | 8.76±0.67      | 7.84±0.82      | 6.06±0.71     | 6.33±0.91     | 8.00±1.38      | 7.78±0.96     |
| FBgn0051523 | + | + |  | 47.29±9.18     | 53.59±7.69     | 50.84±2.97     | 41.78±3.27     | 33.97±4.24    | 33.84±3.88    | 43.72±6.57     | 41.38±5.29    |

|             |   |   |   |               |               |               |              |              |              |              |              |
|-------------|---|---|---|---------------|---------------|---------------|--------------|--------------|--------------|--------------|--------------|
| FBgn0051635 | + | + |   | 8.02±1.03     | 8.16±1.37     | 7.06±0.63     | 7.67±0.17    | 5.96±0.19    | 5.81±0.22    | 6.76±0.51    | 6.58±0.46    |
| FBgn0259236 | + | + |   | 16.99±3.72    | 16.70±3.27    | 16.34±2.04    | 12.59±1.22   | 10.84±1.03   | 10.73±1.55   | 13.63±2.22   | 11.33±0.86   |
| FBgn0259824 | + | + |   | 12.87±1.46    | 11.47±1.09    | 12.85±0.26    | 11.97±0.58   | 9.70±0.64    | 9.80±0.77    | 11.74±1.62   | 11.20±0.52   |
| FBgn0259998 | + | + |   | 716.36±100.90 | 576.40±159.67 | 576.27±168.82 | 252.01±84.49 | 302.26±74.56 | 130.19±10.89 | 313.50±78.01 | 436.64±61.14 |
| FBgn0260632 | + | + |   | 28.36±6.24    | 27.43±5.94    | 25.70±2.80    | 25.92±1.86   | 20.31±2.00   | 19.39±2.22   | 20.13±2.66   | 22.58±1.29   |
| FBgn0261802 | + | + |   | 23.84±3.25    | 23.21±1.51    | 22.20±1.23    | 22.90±1.99   | 18.37±0.36   | 17.66±2.74   | 20.60±2.21   | 21.75±1.15   |
| FBgn0261822 | + | + |   | 161.47±25.96  | 165.07±11.23  | 162.90±6.70   | 155.66±3.82  | 122.12±6.01  | 128.90±11.64 | 143.37±12.88 | 143.41±5.79  |
| FBgn0262475 | + | + |   | 15.30±2.26    | 16.23±1.67    | 15.00±0.19    | 13.77±1.09   | 11.59±0.24   | 11.52±0.46   | 13.08±1.86   | 12.66±0.23   |
| FBgn0262562 | + | + |   | 3.85±0.58     | 4.26±0.80     | 3.41±0.26     | 3.66±0.41    | 2.52±0.28    | 2.89±0.45    | 2.82±0.05    | 3.38±0.15    |
| FBgn0265988 | + | + |   | 9.04±1.75     | 6.69±1.48     | 7.77±0.92     | 8.02±0.40    | 5.46±0.23    | 5.70±1.42    | 5.78±0.33    | 6.60±0.49    |
| FBgn0266719 | + | + |   | 18.41±1.00    | 17.57±0.95    | 19.09±0.81    | 18.99±1.53   | 14.36±0.71   | 16.02±1.99   | 15.41±1.04   | 18.48±0.25   |
| FBgn9999990 | + | + |   | 7.95±1.13     | 8.27±0.90     | 9.76±0.87     | 9.04±0.57    | 4.68±0.16    | 3.74±0.58    | 6.48±1.84    | 8.56±0.77    |
| FBgn0000562 | + |   | + | 22.28±1.68    | 19.37±1.76    | 20.35±0.55    | 20.71±0.73   | 18.81±0.42   | 17.80±0.96   | 16.37±1.30   | 17.27±0.70   |
| FBgn0002121 | + |   | + | 52.03±5.10    | 48.69±4.79    | 45.92±3.76    | 39.22±2.77   | 35.50±2.07   | 38.04±2.64   | 34.08±3.37   | 38.10±1.64   |
| FBgn0004456 | + |   | + | 11.06±1.15    | 12.97±1.52    | 11.72±0.57    | 12.02±0.84   | 10.27±0.09   | 10.53±0.61   | 9.54±0.45    | 9.61±0.45    |
| FBgn0011202 | + |   | + | 19.91±1.54    | 18.05±1.57    | 17.34±1.06    | 16.30±1.13   | 13.93±0.72   | 15.00±0.93   | 13.99±1.82   | 14.66±0.70   |
| FBgn0016684 | + |   | + | 38.00±5.46    | 38.58±8.80    | 28.55±0.83    | 33.96±1.07   | 31.51±4.60   | 25.39±2.22   | 23.43±2.43   | 23.09±2.09   |
| FBgn0022709 | + |   | + | 99.78±25.14   | 120.96±31.13  | 55.77±6.22    | 82.51±7.81   | 61.21±20.95  | 56.30±9.05   | 48.24±6.92   | 52.26±10.88  |
| FBgn0027596 | + |   | + | 26.30±2.87    | 30.67±5.90    | 29.11±1.54    | 30.56±2.02   | 24.09±1.55   | 23.33±1.36   | 21.17±1.56   | 23.59±1.23   |
| FBgn0028397 | + |   | + | 4.60±0.56     | 7.14±0.30     | 3.92±0.52     | 3.65±0.21    | 3.57±0.36    | 3.13±0.55    | 2.52±0.33    | 3.86±0.42    |
| FBgn0028949 | + |   | + | 30.86±10.88   | 17.20±8.18    | 39.55±10.65   | 38.55±4.04   | 34.02±10.74  | 5.46±2.07    | 6.56±0.78    | 9.41±2.28    |
| FBgn0029095 | + |   | + | 14.34±1.72    | 11.58±1.24    | 13.47±0.82    | 14.61±1.39   | 11.17±1.16   | 11.19±0.99   | 10.72±0.69   | 10.52±0.48   |
| FBgn0032156 | + |   | + | 55.85±3.54    | 57.89±13.96   | 54.76±5.54    | 55.09±3.78   | 45.10±3.70   | 43.12±3.37   | 35.53±2.47   | 45.64±2.74   |
| FBgn0032339 | + |   | + | 6.76±1.02     | 5.03±0.67     | 5.67±0.11     | 5.54±0.49    | 4.41±0.06    | 4.99±1.10    | 4.77±0.16    | 4.65±0.33    |
| FBgn0032883 | + |   | + | 5.96±0.44     | 5.75±0.36     | 6.51±0.18     | 6.28±0.36    | 5.17±0.18    | 5.64±0.74    | 4.28±0.64    | 5.64±0.20    |
| FBgn0034113 | + |   | + | 3.86±0.41     | 3.20±0.40     | 3.77±0.18     | 3.49±0.23    | 3.20±0.14    | 2.92±0.40    | 3.03±0.17    | 3.22±0.21    |
| FBgn0034354 | + |   | + | 33.81±3.17    | 53.60±2.97    | 46.50±2.80    | 55.80±3.02   | 39.00±2.34   | 28.64±1.72   | 26.83±1.97   | 35.27±1.32   |
| FBgn0036684 | + |   | + | 14.21±1.72    | 13.28±1.99    | 15.44±1.36    | 13.32±0.90   | 10.08±0.96   | 11.83±1.06   | 10.17±1.47   | 12.54±0.66   |
| FBgn0037638 | + |   | + | 12.21±0.91    | 11.88±0.47    | 12.79±0.26    | 11.66±0.44   | 10.82±0.48   | 10.58±0.70   | 11.12±0.87   | 10.07±0.70   |
| FBgn0038854 | + |   | + | 9.89±0.65     | 8.81±1.09     | 9.29±0.62     | 8.94±0.55    | 7.68±0.24    | 8.33±0.86    | 8.29±0.52    | 7.86±0.37    |
| FBgn0039081 | + |   | + | 34.23±2.66    | 30.84±6.08    | 27.12±3.61    | 26.99±2.58   | 24.79±4.17   | 21.80±2.23   | 18.13±2.48   | 19.58±4.28   |
| FBgn0039486 | + |   | + | 28.83±2.18    | 37.28±17.08   | 24.13±2.78    | 28.61±3.00   | 24.42±2.26   | 21.32±6.49   | 17.09±3.92   | 13.21±2.49   |
| FBgn0051028 | + |   | + | 4.40±0.17     | 3.25±0.56     | 3.70±0.13     | 4.09±0.51    | 2.98±0.17    | 3.41±0.30    | 2.91±0.18    | 2.96±0.50    |
| FBgn0052170 | + |   | + | 8.93±1.38     | 8.54±0.34     | 7.29±1.68     | 8.18±0.44    | 6.67±1.34    | 6.17±0.21    | 5.41±0.81    | 5.25±0.36    |
| FBgn0053301 | + |   | + | 44.84±6.38    | 63.41±8.58    | 44.98±3.92    | 43.01±4.22   | 30.62±2.62   | 28.40±4.12   | 20.79±6.81   | 24.70±5.19   |
| FBgn0053556 | + |   | + | 5.80±0.64     | 4.45±0.48     | 4.73±0.59     | 5.00±0.37    | 4.26±0.52    | 4.24±0.16    | 3.87±0.38    | 3.57±0.32    |
| FBgn0261859 | + |   | + | 4.14±0.44     | 4.21±0.50     | 3.80±0.37     | 3.83±0.31    | 3.26±0.42    | 3.35±0.36    | 2.95±0.22    | 3.10±0.26    |
| FBgn0262515 | + |   | + | 215.43±9.55   | 230.74±26.69  | 206.29±3.79   | 188.68±2.16  | 175.33±20.09 | 179.30±5.58  | 158.72±15.86 | 163.65±4.91  |
| FBgn0266448 | + |   | + | 164.15±15.20  | 153.64±15.71  | 180.25±19.04  | 136.59±12.26 | 127.55±21.50 | 106.27±4.85  | 91.78±8.18   | 127.34±19.45 |
| FBgn0000247 | + |   |   | 6.61±0.50     | 9.20±0.42     | 6.62±0.18     | 6.45±0.35    | 5.85±0.33    | 5.83±0.59    | 5.90±0.43    | 6.42±0.48    |
| FBgn0000376 | + |   |   | 7.69±1.11     | 4.06±0.55     | 4.44±0.16     | 4.69±0.40    | 3.51±0.03    | 4.22±0.86    | 3.69±0.22    | 4.28±0.22    |
| FBgn0003159 | + |   |   | 16.07±1.74    | 17.36±2.31    | 16.82±0.47    | 14.70±1.87   | 12.67±1.43   | 12.86±0.39   | 13.45±1.16   | 12.64±1.49   |
| FBgn0003388 | + |   |   | 39.63±7.91    | 30.59±3.99    | 40.31±1.20    | 33.55±1.83   | 28.28±2.98   | 28.49±5.41   | 26.51±1.17   | 33.02±0.86   |
| FBgn0003416 | + |   |   | 4.16±0.32     | 4.31±0.24     | 4.56±0.27     | 3.89±0.17    | 3.27±0.08    | 3.69±0.74    | 3.78±0.70    | 3.58±0.01    |
| FBgn0015803 | + |   |   | 14.53±2.22    | 15.97±2.18    | 16.90±0.99    | 13.97±0.66   | 11.62±0.76   | 13.37±1.63   | 12.32±1.88   | 13.54±1.32   |

|             |   |   |  |               |               |              |              |               |              |               |               |
|-------------|---|---|--|---------------|---------------|--------------|--------------|---------------|--------------|---------------|---------------|
| FBgn0016917 | + |   |  | 76.95±14.56   | 70.69±6.04    | 75.24±8.68   | 71.37±6.11   | 60.17±0.46    | 55.92±6.66   | 61.34±1.21    | 59.97±4.36    |
| FBgn0021847 | + |   |  | 6.39±0.58     | 6.45±0.72     | 19.27±1.40   | 6.27±0.80    | 5.63±0.23     | 6.13±0.50    | 5.88±0.60     | 6.16±0.44     |
| FBgn0022800 | + |   |  | 8.55±1.27     | 7.07±1.25     | 9.19±0.77    | 8.98±0.95    | 6.37±0.28     | 6.78±0.70    | 6.94±0.87     | 7.09±0.91     |
| FBgn0023540 | + |   |  | 21.52±5.27    | 22.82±4.67    | 26.54±2.68   | 27.53±3.26   | 17.26±0.32    | 17.90±3.69   | 15.95±1.44    | 21.80±2.66    |
| FBgn0024150 | + |   |  | 4.28±1.16     | 3.75±0.20     | 3.59±0.63    | 4.47±0.10    | 2.90±0.53     | 2.81±0.17    | 2.90±0.25     | 3.32±0.32     |
| FBgn0027836 | + |   |  | 19.17±1.65    | 16.64±3.88    | 62.72±34.67  | 32.24±5.72   | 21.13±1.26    | 16.68±1.28   | 16.27±1.15    | 16.82±1.68    |
| FBgn0028490 | + |   |  | 90.90±4.37    | 78.84±6.08    | 81.72±6.43   | 84.93±5.87   | 65.38±1.00    | 72.45±10.51  | 64.86±4.02    | 74.09±2.30    |
| FBgn0029689 | + |   |  | 6.58±0.53     | 7.90±0.36     | 8.24±1.75    | 7.94±0.58    | 5.43±0.70     | 6.04±0.36    | 5.48±1.14     | 5.63±1.05     |
| FBgn0029762 | + |   |  | 25.17±6.23    | 51.29±32.81   | 36.00±4.49   | 36.46±2.34   | 25.83±7.50    | 14.06±0.33   | 16.91±3.34    | 27.37±1.55    |
| FBgn0029891 | + |   |  | 43.93±3.29    | 37.69±3.05    | 42.65±1.23   | 41.65±5.94   | 32.02±2.73    | 32.99±6.23   | 30.87±1.82    | 39.69±2.72    |
| FBgn0030102 | + |   |  | 32.15±5.18    | 43.24±8.87    | 41.29±7.98   | 38.02±4.13   | 28.13±0.84    | 27.90±2.19   | 32.62±8.14    | 23.42±4.10    |
| FBgn0030735 | + |   |  | 17.99±2.47    | 15.11±2.44    | 18.17±0.50   | 16.07±1.02   | 13.35±0.15    | 13.59±2.55   | 13.81±1.26    | 15.32±0.24    |
| FBgn0030798 | + |   |  | 4.25±1.17     | 2.90±1.23     | 4.95±1.02    | 3.54±0.79    | 2.42±0.24     | 2.92±0.76    | 2.15±0.12     | 2.64±0.20     |
| FBgn0031399 | + |   |  | 10.39±1.16    | 9.04±1.08     | 9.87±0.59    | 9.37±1.20    | 7.44±0.57     | 8.37±1.45    | 7.72±0.49     | 8.52±0.34     |
| FBgn0032435 | + |   |  | 19.57±3.65    | 18.92±9.09    | 11.90±2.64   | 8.79±1.05    | 8.72±1.85     | 6.95±1.30    | 8.75±2.76     | 10.28±0.91    |
| FBgn0033494 | + |   |  | 9.42±0.76     | 11.17±1.47    | 53.93±1.83   | 10.85±0.73   | 10.16±1.05    | 9.43±1.10    | 10.08±0.23    | 10.62±0.32    |
| FBgn0033744 | + |   |  | 6.61±0.96     | 6.70±1.55     | 8.12±0.47    | 8.79±0.53    | 6.27±0.55     | 5.19±0.81    | 4.67±0.61     | 6.69±0.36     |
| FBgn0034052 | + |   |  | 227.58±16.34  | 306.15±131.60 | 259.16±28.14 | 303.10±20.63 | 223.93±43.68  | 126.48±9.32  | 162.94±9.45   | 191.89±33.56  |
| FBgn0034083 | + |   |  | 12.40±1.93    | 13.39±1.90    | 14.83±0.83   | 11.64±0.71   | 9.86±0.43     | 10.53±1.41   | 10.28±1.16    | 12.53±0.82    |
| FBgn0035137 | + |   |  | 8.49±0.98     | 8.13±0.73     | 8.15±0.33    | 7.44±0.49    | 6.27±0.32     | 6.82±1.24    | 6.85±0.78     | 7.52±0.25     |
| FBgn0035321 | + |   |  | 40.80±2.28    | 41.87±2.33    | 41.85±1.48   | 40.75±3.63   | 31.87±1.19    | 36.18±1.33   | 37.06±1.40    | 34.83±0.28    |
| FBgn0036321 | + |   |  | 65.90±26.50   | 137.27±105.12 | 38.28±7.41   | 43.79±7.68   | 37.73±17.19   | 22.89±7.35   | 22.98±8.47    | 33.90±8.86    |
| FBgn0036461 | + |   |  | 19.16±3.07    | 22.47±2.54    | 21.33±0.87   | 22.32±2.05   | 17.95±0.70    | 17.97±3.05   | 17.98±1.14    | 17.33±0.48    |
| FBgn0036556 | + |   |  | 23.13±1.80    | 20.85±1.58    | 24.15±0.27   | 22.04±0.69   | 19.09±0.26    | 19.31±2.01   | 16.90±1.72    | 21.69±1.03    |
| FBgn0036735 | + |   |  | 11.34±1.73    | 9.65±1.05     | 11.18±0.24   | 10.44±0.84   | 7.94±0.45     | 9.52±1.19    | 9.07±0.43     | 9.45±0.67     |
| FBgn0038095 | + |   |  | 35.12±17.68   | 20.76±4.97    | 14.14±2.28   | 25.83±6.92   | 10.91±1.86    | 15.71±7.39   | 10.95±1.51    | 16.12±1.52    |
| FBgn0038701 | + |   |  | 72.01±9.40    | 94.06±40.44   | 41.22±12.36  | 31.45±4.27   | 28.40±5.94    | 30.22±2.46   | 33.33±12.82   | 37.63±9.91    |
| FBgn0039529 | + |   |  | 15.20±1.63    | 15.66±0.66    | 14.14±0.77   | 14.69±1.37   | 12.15±0.99    | 12.02±0.72   | 11.92±1.61    | 13.89±0.94    |
| FBgn0039738 | + |   |  | 9.49±0.73     | 9.99±0.63     | 9.42±0.56    | 9.72±0.96    | 8.29±0.54     | 6.98±0.64    | 7.19±0.58     | 9.24±0.43     |
| FBgn0040551 | + |   |  | 204.31±28.57  | 127.87±26.98  | 105.72±19.88 | 109.53±6.74  | 101.13±19.91  | 82.19±1.93   | 102.31±8.18   | 83.06±19.94   |
| FBgn0045823 | + |   |  | 203.31±27.48  | 203.82±15.13  | 224.17±9.38  | 191.40±15.54 | 152.37±4.61   | 182.19±35.55 | 177.19±14.89  | 183.85±9.56   |
| FBgn0050392 | + |   |  | 22.77±3.93    | 18.76±2.01    | 20.93±2.45   | 19.80±2.24   | 16.01±0.88    | 15.61±2.61   | 16.09±3.50    | 17.54±1.31    |
| FBgn0051719 | + |   |  | 5.93±1.33     | 8.19±3.29     | 6.90±0.83    | 5.84±0.55    | 4.88±0.40     | 4.10±1.02    | 3.38±0.32     | 5.22±1.04     |
| FBgn0052177 | + |   |  | 16.56±3.88    | 17.70±2.37    | 17.33±1.03   | 15.96±1.10   | 12.33±0.64    | 14.12±1.62   | 14.57±2.09    | 13.77±0.40    |
| FBgn0052476 | + |   |  | 15.03±2.40    | 16.20±2.65    | 14.62±1.73   | 12.60±1.03   | 10.75±0.26    | 11.26±0.50   | 12.12±2.08    | 12.27±0.86    |
| FBgn0087007 | + |   |  | 29.67±1.81    | 30.74±3.31    | 34.61±2.69   | 23.74±0.95   | 24.29±1.45    | 23.76±0.93   | 25.91±3.10    | 23.57±0.64    |
| FBgn0259736 | + |   |  | 27.55±3.69    | 23.39±4.01    | 25.71±2.71   | 22.14±2.56   | 19.05±1.64    | 17.80±2.43   | 18.07±1.92    | 23.11±2.94    |
| FBgn0261403 | + |   |  | 39.40±4.31    | 33.69±0.91    | 39.25±1.33   | 33.36±2.16   | 31.08±2.26    | 30.72±1.91   | 31.38±1.62    | 31.07±0.90    |
| FBgn0261553 | + |   |  | 17.45±1.31    | 17.06±1.41    | 17.43±0.65   | 15.59±0.57   | 13.06±0.59    | 15.08±1.50   | 15.50±1.37    | 14.99±0.55    |
| FBgn0263346 | + |   |  | 32.57±2.43    | 30.76±1.68    | 32.40±0.76   | 28.39±1.60   | 25.24±1.78    | 25.81±2.66   | 24.37±0.52    | 28.63±0.53    |
| FBgn0267698 | + |   |  | 25.96±1.96    | 26.66±2.82    | 23.90±0.98   | 22.33±0.85   | 20.00±0.72    | 19.16±0.76   | 20.92±3.03    | 22.90±1.06    |
| FBgn0283499 | + |   |  | 7.50±1.49     | 9.34±2.06     | 7.51±0.82    | 7.03±0.42    | 5.11±1.07     | 5.59±0.66    | 6.03±0.73     | 6.57±1.47     |
| FBgn0283712 | + |   |  | 4.50±0.48     | 4.47±0.42     | 4.91±0.12    | 4.56±0.49    | 3.82±0.15     | 3.87±0.62    | 3.85±0.39     | 4.07±0.43     |
| FBgn0004430 |   | + |  | 511.18±89.31  | 322.52±54.00  | 137.18±19.87 | 15.95±4.10   | 47.32±9.14    | 77.46±5.00   | 185.93±100.57 | 309.64±41.34  |
| FBgn0010358 |   | + |  | 993.10±245.97 | 829.52±167.10 | 303.72±66.27 | 268.13±38.95 | 419.59±114.81 | 189.41±12.78 | 705.31±243.83 | 742.24±112.29 |

|             |  |   |  |                |                |                |                |                |                 |                |                 |
|-------------|--|---|--|----------------|----------------|----------------|----------------|----------------|-----------------|----------------|-----------------|
| FBgn0015754 |  | + |  | 37.88±4.22     | 36.90±3.20     | 37.30±1.25     | 35.53±3.19     | 30.01±0.24     | 31.56±5.20      | 36.32±3.12     | 37.81±2.80      |
| FBgn0015924 |  | + |  | 33.96±6.64     | 28.62±4.06     | 32.82±1.28     | 27.46±2.35     | 22.40±1.02     | 25.10±3.84      | 31.26±4.50     | 28.12±1.38      |
| FBgn0024321 |  | + |  | 7.10±1.20      | 6.10±0.61      | 6.89±0.27      | 6.59±0.74      | 5.10±0.07      | 5.06±1.49       | 6.27±0.73      | 6.72±0.37       |
| FBgn0028380 |  | + |  | 8.24±0.86      | 8.57±0.61      | 8.04±0.32      | 8.26±0.33      | 6.81±0.10      | 6.45±0.10       | 8.10±1.05      | 8.47±0.33       |
| FBgn0028484 |  | + |  | 7.85±0.71      | 6.34±0.89      | 8.31±0.66      | 7.52±0.57      | 5.43±0.17      | 6.35±1.05       | 7.48±0.86      | 6.64±0.51       |
| FBgn0029676 |  | + |  | 45.84±4.92     | 46.16±5.10     | 51.87±4.76     | 38.11±2.01     | 36.84±1.25     | 37.22±5.00      | 39.61±4.28     | 48.03±2.74      |
| FBgn0030090 |  | + |  | 4.25±1.07      | 3.72±0.30      | 3.75±0.18      | 4.35±0.04      | 3.02±0.35      | 2.72±0.57       | 3.73±0.39      | 4.00±0.29       |
| FBgn0031654 |  | + |  | 206.80±79.88   | 213.28±57.13   | 64.42±23.63    | 45.76±9.72     | 65.53±18.38    | 32.65±6.55      | 124.54±53.02   | 144.74±36.81    |
| FBgn0031682 |  | + |  | 22.13±3.17     | 26.14±2.65     | 24.24±2.04     | 24.11±2.58     | 17.27±1.50     | 19.24±2.35      | 24.99±2.82     | 21.58±1.77      |
| FBgn0031689 |  | + |  | 48.52±13.90    | 25.29±2.53     | 31.24±4.92     | 52.19±4.00     | 18.77±2.97     | 19.33±2.63      | 33.78±6.50     | 46.53±11.75     |
| FBgn0031799 |  | + |  | 5.59±0.49      | 5.08±0.58      | 5.49±0.23      | 5.03±0.56      | 4.33±0.09      | 4.26±0.43       | 5.66±0.79      | 4.87±0.03       |
| FBgn0032018 |  | + |  | 13.21±2.67     | 14.80±2.59     | 14.61±1.14     | 11.20±0.82     | 9.23±1.16      | 10.08±1.33      | 12.31±2.14     | 11.33±1.27      |
| FBgn0032144 |  | + |  | 325.21±28.38   | 251.76±50.25   | 278.33±90.83   | 162.80±69.28   | 128.59±36.53   | 125.38±2.29     | 151.86±51.43   | 352.85±27.45    |
| FBgn0032264 |  | + |  | 26.40±3.78     | 32.53±5.92     | 32.27±5.13     | 30.76±1.47     | 20.18±3.48     | 14.11±1.61      | 22.80±2.40     | 35.18±1.50      |
| FBgn0032451 |  | + |  | 33.04±3.57     | 33.35±4.81     | 31.69±2.60     | 23.61±1.55     | 21.71±3.34     | 19.99±2.10      | 27.29±3.61     | 28.62±2.70      |
| FBgn0033244 |  | + |  | 15.64±1.16     | 15.23±1.59     | 16.45±0.71     | 14.94±1.19     | 11.76±0.69     | 13.04±1.53      | 14.64±1.03     | 15.43±1.62      |
| FBgn0033544 |  | + |  | 121.71±31.15   | 137.74±32.50   | 123.51±8.63    | 97.19±12.41    | 79.72±15.00    | 78.94±5.87      | 116.72±26.59   | 102.36±12.44    |
| FBgn0033609 |  | + |  | 10.71±1.77     | 10.26±1.06     | 11.41±0.73     | 11.86±1.35     | 8.38±0.54      | 8.83±1.42       | 9.93±0.61      | 10.03±0.60      |
| FBgn0034063 |  | + |  | 26.69±5.91     | 21.50±2.59     | 22.60±4.45     | 23.42±0.54     | 15.87±3.24     | 13.66±0.90      | 20.85±4.17     | 20.50±4.09      |
| FBgn0034304 |  | + |  | 3.82±0.49      | 3.90±0.45      | 4.71±0.34      | 4.20±0.43      | 3.07±0.08      | 3.44±0.64       | 3.91±0.52      | 4.53±0.10       |
| FBgn0034356 |  | + |  | 74.09±22.07    | 45.61±16.48    | 49.72±3.48     | 56.11±6.99     | 30.52±4.86     | 27.98±5.19      | 79.67±9.00     | 75.13±20.81     |
| FBgn0034796 |  | + |  | 17.79±1.94     | 14.83±1.16     | 16.00±1.11     | 17.23±0.44     | 12.31±0.97     | 12.42±1.76      | 19.87±1.70     | 14.90±0.49      |
| FBgn0035665 |  | + |  | 1746.68±511.56 | 1625.50±388.17 | 653.19±147.67  | 589.50±92.88   | 537.13±152.69  | 296.47±36.08    | 1514.89±649.54 | 1170.73±182.32  |
| FBgn0036196 |  | + |  | 15.70±6.48     | 15.27±3.41     | 13.51±1.83     | 10.83±0.60     | 6.48±1.39      | 9.10±2.66       | 14.05±3.23     | 10.95±2.12      |
| FBgn0036484 |  | + |  | 24.20±2.63     | 20.90±0.94     | 24.80±0.53     | 23.14±1.12     | 18.53±0.26     | 19.60±1.47      | 20.21±1.93     | 24.03±0.43      |
| FBgn0036666 |  | + |  | 37.64±4.15     | 37.52±3.17     | 39.28±1.09     | 40.57±2.68     | 33.37±1.43     | 31.18±3.98      | 37.24±2.77     | 35.75±2.66      |
| FBgn0036767 |  | + |  | 74.33±47.95    | 98.77±45.47    | 27.02±9.39     | 24.99±4.67     | 21.78±10.13    | 10.72±1.85      | 51.91±20.01    | 29.49±12.10     |
| FBgn0036831 |  | + |  | 51.86±18.52    | 88.15±26.48    | 11.81±1.82     | 5.57±0.10      | 15.56±6.03     | 7.07±1.41       | 35.62±18.45    | 29.98±3.95      |
| FBgn0037442 |  | + |  | 27.80±4.39     | 25.38±2.71     | 27.19±1.54     | 26.05±1.77     | 18.94±0.75     | 22.65±3.84      | 26.41±3.29     | 26.82±0.10      |
| FBgn0037949 |  | + |  | 6.47±1.14      | 5.55±0.81      | 6.16±0.10      | 6.30±0.62      | 4.45±0.10      | 5.26±1.19       | 5.37±0.36      | 5.49±0.18       |
| FBgn0038484 |  | + |  | 63.14±4.84     | 60.27±20.38    | 47.56±2.10     | 32.65±5.83     | 32.53±7.20     | 22.98±6.88      | 44.12±9.38     | 53.23±1.43      |
| FBgn0038680 |  | + |  | 18.11±2.61     | 15.81±2.29     | 24.81±1.23     | 13.44±0.73     | 13.06±4.21     | 6.37±1.18       | 13.37±2.95     | 15.01±1.81      |
| FBgn0038747 |  | + |  | 17.08±2.05     | 17.25±1.90     | 17.74±0.65     | 16.13±1.21     | 12.18±1.01     | 14.42±2.87      | 16.88±2.50     | 16.63±1.13      |
| FBgn0038809 |  | + |  | 35.08±7.55     | 28.69±4.68     | 43.47±3.47     | 30.33±4.05     | 22.71±1.53     | 26.29±7.96      | 30.30±4.47     | 33.50±1.01      |
| FBgn0039528 |  | + |  | 7.51±0.89      | 7.46±0.69      | 7.88±0.39      | 6.37±0.40      | 5.72±0.37      | 5.75±0.76       | 7.54±1.29      | 6.51±0.53       |
| FBgn0039644 |  | + |  | 2.94±0.45      | 2.59±0.42      | 3.06±0.16      | 2.42±0.18      | 2.11±0.04      | 2.17±0.41       | 2.92±0.41      | 2.64±0.20       |
| FBgn0040060 |  | + |  | 1048.40±314.88 | 710.64±199.09  | 415.98±101.23  | 246.38±20.30   | 324.89±93.80   | 172.56±34.85    | 595.26±235.61  | 680.99±112.96   |
| FBgn0046692 |  | + |  | 16.22±2.47     | 14.49±0.73     | 14.68±1.12     | 14.96±1.78     | 10.97±1.00     | 12.09±2.04      | 12.24±0.93     | 15.14±0.35      |
| FBgn0050345 |  | + |  | 18.99±6.30     | 22.55±4.97     | 22.99±1.68     | 13.90±1.11     | 12.07±2.60     | 12.45±1.83      | 21.30±4.52     | 19.19±4.00      |
| FBgn0052475 |  | + |  | 6.68±0.84      | 3.00±0.23      | 7.95±0.15      | 7.50±1.10      | 2.96±0.05      | 3.47±0.68       | 7.50±0.46      | 6.36±0.50       |
| FBgn0058469 |  | + |  | 7193.42±711.34 | 5717.90±31.64  | 6389.39±319.04 | 7897.65±857.66 | 5139.93±289.97 | 5532.22±1165.61 | 8270.28±895.35 | 8352.72±1003.83 |
| FBgn0085442 |  | + |  | 31.48±3.75     | 30.04±3.06     | 31.37±1.21     | 33.28±1.68     | 25.08±1.75     | 26.27±2.15      | 30.64±3.84     | 28.86±1.87      |
| FBgn0086686 |  | + |  | 19.20±2.78     | 17.88±2.19     | 19.38±0.67     | 17.83±1.39     | 14.02±0.24     | 15.81±2.82      | 18.10±2.10     | 18.04±1.83      |
| FBgn0250815 |  | + |  | 2453.93±676.37 | 2308.01±588.92 | 934.28±262.31  | 765.05±86.77   | 840.48±176.18  | 473.54±70.86    | 2092.47±930.09 | 1668.92±254.93  |
| FBgn0261985 |  | + |  | 24.02±2.37     | 25.13±3.09     | 24.73±1.60     | 24.40±0.68     | 18.20±1.81     | 20.46±2.20      | 24.10±3.01     | 22.84±2.43      |

|             |  |   |              |              |              |              |              |              |              |              |
|-------------|--|---|--------------|--------------|--------------|--------------|--------------|--------------|--------------|--------------|
| FBgn0000317 |  | + | 5.31±0.17    | 5.89±0.49    | 6.40±0.30    | 5.02±0.14    | 5.20±0.31    | 5.12±0.25    | 5.11±0.71    | 4.16±0.22    |
| FBgn0004380 |  | + | 13.33±0.92   | 12.25±0.48   | 13.59±0.66   | 14.90±1.40   | 12.33±0.48   | 12.79±1.32   | 10.45±0.53   | 12.39±0.53   |
| FBgn0011603 |  | + | 19.13±2.23   | 18.23±4.27   | 16.49±1.76   | 15.73±1.17   | 13.66±2.09   | 14.78±3.31   | 10.31±1.46   | 12.37±2.15   |
| FBgn0015541 |  | + | 15.48±0.43   | 14.96±0.79   | 18.25±0.85   | 14.37±0.66   | 14.49±0.50   | 14.35±0.37   | 12.15±0.32   | 14.28±0.38   |
| FBgn0023001 |  | + | 11.77±0.88   | 10.75±0.83   | 10.62±0.37   | 11.09±0.92   | 9.97±0.19    | 9.21±0.40    | 8.84±0.97    | 9.57±0.67    |
| FBgn0025702 |  | + | 14.54±1.83   | 14.14±2.97   | 15.04±1.89   | 14.23±0.56   | 14.38±0.69   | 10.92±1.37   | 9.42±0.37    | 10.49±1.08   |
| FBgn0027375 |  | + | 7.62±1.27    | 7.04±0.91    | 7.39±0.52    | 7.67±0.59    | 6.19±0.32    | 6.66±0.82    | 5.40±0.34    | 6.67±0.53    |
| FBgn0027493 |  | + | 152.80±18.85 | 165.64±44.99 | 135.81±12.47 | 136.30±8.83  | 108.89±15.95 | 112.96±20.61 | 92.33±10.24  | 110.30±4.17  |
| FBgn0027621 |  | + | 31.98±1.52   | 28.72±2.45   | 28.54±2.13   | 27.99±1.81   | 27.23±1.45   | 25.46±0.26   | 23.17±0.31   | 24.73±1.10   |
| FBgn0028538 |  | + | 9.71±0.47    | 9.67±0.78    | 9.63±0.51    | 9.20±0.34    | 9.25±0.47    | 8.86±0.34    | 8.47±0.56    | 7.61±0.24    |
| FBgn0029147 |  | + | 9.26±0.81    | 8.94±0.78    | 6.69±1.84    | 7.55±1.90    | 6.94±1.63    | 5.66±1.25    | 4.24±0.60    | 6.18±0.58    |
| FBgn0029848 |  | + | 6.36±0.87    | 11.27±0.43   | 1.89±0.17    | 5.84±0.74    | 11.48±1.69   | 6.31±0.31    | 1.41±0.19    | 3.23±0.31    |
| FBgn0030529 |  | + | 51.03±4.49   | 53.99±9.01   | 52.46±2.21   | 46.21±3.66   | 47.92±2.38   | 45.45±2.37   | 41.50±4.43   | 39.75±0.91   |
| FBgn0030999 |  | + | 178.53±29.87 | 202.75±81.08 | 164.40±14.88 | 162.46±10.67 | 166.22±31.29 | 195.76±19.99 | 111.20±19.81 | 104.11±13.07 |
| FBgn0031055 |  | + | 7.52±0.10    | 5.27±0.83    | 8.06±1.06    | 7.06±0.41    | 5.80±0.02    | 6.76±0.55    | 5.24±0.60    | 5.17±0.21    |
| FBgn0031401 |  | + | 34.06±3.86   | 29.32±5.42   | 33.80±4.28   | 28.34±0.67   | 27.04±2.25   | 27.38±1.17   | 18.28±1.63   | 26.62±2.08   |
| FBgn0031611 |  | + | 4.80±0.58    | 4.74±0.40    | 5.04±0.24    | 5.05±0.50    | 4.10±0.16    | 4.54±0.65    | 4.45±0.50    | 3.98±0.28    |
| FBgn0032010 |  | + | 13.23±1.70   | 12.23±0.96   | 11.71±1.19   | 14.12±0.44   | 12.60±0.73   | 13.53±0.98   | 10.33±0.53   | 9.59±0.74    |
| FBgn0033504 |  | + | 63.64±4.34   | 72.10±8.65   | 66.68±2.31   | 69.05±3.55   | 62.80±1.38   | 55.41±4.23   | 50.96±4.92   | 57.84±2.54   |
| FBgn0033631 |  | + | 103.85±6.44  | 96.15±8.71   | 101.11±1.63  | 107.69±9.29  | 94.71±3.10   | 112.46±16.41 | 85.51±4.73   | 75.65±6.54   |
| FBgn0034985 |  | + | 15.77±1.57   | 11.68±2.04   | 13.88±0.88   | 14.49±1.82   | 12.02±0.68   | 14.54±0.47   | 10.86±0.71   | 10.16±0.47   |
| FBgn0035710 |  | + | 46.81±6.81   | 37.85±2.76   | 40.64±3.99   | 51.00±1.68   | 43.31±1.25   | 38.08±4.78   | 31.36±3.43   | 32.31±2.16   |
| FBgn0036891 |  | + | 10.45±0.75   | 8.79±0.52    | 9.23±0.58    | 12.25±0.37   | 12.43±0.26   | 11.48±1.02   | 7.87±1.49    | 7.79±0.33    |
| FBgn0037447 |  | + | 100.28±7.31  | 86.92±6.36   | 83.02±4.23   | 93.20±2.72   | 82.48±0.40   | 87.41±6.82   | 76.46±4.15   | 75.47±4.13   |
| FBgn0037911 |  | + | 11.32±1.34   | 10.00±1.83   | 12.60±1.61   | 11.44±1.00   | 8.71±0.42    | 10.44±0.11   | 7.73±0.42    | 9.26±0.40    |
| FBgn0037935 |  | + | 17.30±2.60   | 16.03±3.27   | 20.41±2.80   | 14.34±0.87   | 17.03±2.69   | 10.38±1.18   | 11.69±2.45   | 10.23±2.31   |
| FBgn0038681 |  | + | 83.92±2.76   | 86.35±7.28   | 100.36±7.05  | 89.73±4.53   | 51.64±8.50   | 104.20±3.38  | 64.19±10.41  | 55.46±8.80   |
| FBgn0038718 |  | + | 54.55±9.70   | 79.42±5.14   | 67.19±3.76   | 74.50±10.96  | 67.29±4.49   | 60.26±6.85   | 54.56±9.60   | 35.84±6.38   |
| FBgn0038735 |  | + | 25.36±0.95   | 23.85±0.96   | 26.79±0.42   | 23.76±1.05   | 23.19±0.51   | 20.00±0.15   | 20.70±1.24   | 21.67±1.58   |
| FBgn0039043 |  | + | 23.96±3.26   | 19.20±2.20   | 20.62±1.35   | 25.94±1.74   | 17.12±1.80   | 22.72±1.58   | 17.45±0.74   | 16.92±1.62   |
| FBgn0039223 |  | + | 19.98±3.00   | 21.99±2.90   | 22.20±2.16   | 18.49±2.46   | 15.64±2.44   | 17.17±2.06   | 17.81±2.88   | 12.69±1.14   |
| FBgn0039226 |  | + | 20.15±5.64   | 21.26±6.28   | 16.89±3.45   | 18.69±1.71   | 15.64±2.91   | 16.77±2.91   | 11.78±2.13   | 11.86±0.86   |
| FBgn0040234 |  | + | 7.02±0.89    | 7.40±1.23    | 6.40±0.50    | 7.64±0.47    | 6.15±0.70    | 6.04±0.88    | 4.88±0.31    | 5.30±0.22    |
| FBgn0040252 |  | + | 7.58±0.86    | 9.15±0.54    | 7.41±0.84    | 5.70±0.82    | 8.38±1.22    | 7.61±0.49    | 3.97±0.62    | 5.42±0.52    |
| FBgn0041181 |  | + | 10.87±0.53   | 7.94±1.55    | 9.90±1.10    | 10.99±1.61   | 9.17±0.79    | 11.06±0.39   | 7.85±0.49    | 6.91±0.45    |
| FBgn0051321 |  | + | 25.33±3.63   | 13.26±3.80   | 21.41±2.22   | 21.90±3.45   | 18.92±1.86   | 18.56±2.78   | 14.77±0.35   | 9.66±1.57    |
| FBgn0051781 |  | + | 18.05±3.12   | 23.75±6.35   | 15.74±2.02   | 9.29±0.52    | 16.85±1.23   | 12.98±0.63   | 12.51±0.50   | 9.90±0.48    |
| FBgn0052528 |  | + | 40.30±1.28   | 40.91±1.82   | 42.14±0.55   | 39.29±1.66   | 36.02±1.21   | 38.78±1.11   | 35.87±0.77   | 35.50±1.16   |
| FBgn0087035 |  | + | 60.65±6.62   | 61.60±7.02   | 51.97±1.27   | 64.57±4.84   | 54.52±2.47   | 57.14±7.64   | 51.05±3.02   | 49.18±1.97   |
| FBgn0261675 |  | + | 3.83±1.03    | 5.54±2.31    | 3.66±1.02    | 4.49±1.11    | 4.12±2.20    | 3.22±1.16    | 2.25±0.46    | 1.55±0.43    |
| FBgn0262511 |  | + | 128.94±8.53  | 139.87±15.53 | 130.58±3.08  | 112.39±1.61  | 152.36±10.15 | 111.26±6.71  | 97.06±9.55   | 98.92±4.36   |
| FBgn0264953 |  | + | 10.77±1.08   | 12.02±1.28   | 11.68±0.89   | 10.05±0.26   | 9.93±0.78    | 10.26±0.36   | 9.08±0.42    | 8.93±0.12    |
| FBgn0283535 |  | + | 299.83±17.26 | 335.37±47.82 | 299.12±3.17  | 280.49±6.90  | 256.58±29.05 | 271.25±13.99 | 233.50±22.32 | 237.95±11.22 |

\*Annotation for genes taken from the *Drosophila melanogaster* genome strain Oregon R, version: dmel\_r6.15\_FB2017\_02. Gene rows marked with a "+" indicate that the gene had significantly higher expression in the four high lethality lines at the P<0.01 level of significance, when compared to the indicated lower lethality group.

† All Low represents the comparison of the FL3#2 crosses for the four high lethality lines (153H, 195H, 399H, and 911H) to all four low lethality lines (350L, 492L, 317L, and 646L). Gene rows marked with a “+” indicate that the gene had significantly higher expression in the four high lethality lines at the  $P < 0.01$  level of significance.

‡ Low tTA represents the comparison of the FL3#2 crosses for the four high lethality lines (153H, 195H, 399H, and 911H) to the two low lethality lines that had lower expression levels of tTA (350L and 492L).

\*\* High tTA represents the comparison of the FL3#2 crosses for the four high lethality lines (153H, 195H, 399H, and 911H) to the two low lethality lines that had higher expression levels of tTA (317L and 646L).

†† Indicates the DGRP line to which the FL3#2 was crossed. DGRP lines followed by “H” had high levels of lethality, DGRP lines followed by “L” had low levels of lethality. Values within columns indicate the average RPKM value  $\pm$  standard error of the mean.
