# Supplementary material
Source: publisher figshare collection journal article supplement (https://gsajournals.figshare.com/articles/dataset/_/11771622)
Supplement: Supplementary file 12 [file 1]

**Supplementary Table 4** Results of the tests for statistical significance of *Minos* gene disruption crosses.

| <i>Gene</i>    | BDSC <sup>1</sup> stock number and allele                   | Minos location within gene                                         | Difference between means of <i>Minos</i> strain and <i>w<sup>1118</sup></i> control | Simultaneous 95% confidence limits <sup>2</sup> |            |
|----------------|-------------------------------------------------------------|--------------------------------------------------------------------|-------------------------------------------------------------------------------------|-------------------------------------------------|------------|
| <i>Camta</i>   | 24606, <a href="#">Camta<sup>MB05101</sup></a>              | exon (coding)                                                      | 40.186                                                                              | 20.323                                          | 60.050 *** |
| <i>bru3</i>    | 29215, <a href="#">bru3<sup>MB11495</sup></a>               | intron                                                             | 30.939                                                                              | 11.075                                          | 50.802 *** |
| <i>tey</i>     | 24067, <a href="#">tey<sup>MB03446</sup></a>                | intron                                                             | 30.446                                                                              | 10.583                                          | 50.310 *** |
| <i>bru3</i>    | 24666, <a href="#">bru3<sup>MB04010</sup></a>               | intron                                                             | 30.103                                                                              | 10.240                                          | 49.967 *** |
| <i>bru1</i>    | 25234, <a href="#">bru1<sup>MB05908</sup></a>               | intron                                                             | 29.862                                                                              | 9.998                                           | 49.725 *** |
| <i>mas</i>     | 29267, <a href="#">mas<sup>MB11963</sup></a>                | exon (coding)                                                      | 26.283                                                                              | 6.420                                           | 46.147 *** |
| <i>Src64B</i>  | 24071, <a href="#">Src64B<sup>MB03494</sup></a>             | intron                                                             | 21.875                                                                              | 2.012                                           | 41.739 *** |
| <i>zormin</i>  | 23490, <a href="#">zormin<sup>MB02779</sup></a>             | intron                                                             | 21.417                                                                              | 1.553                                           | 41.280 *** |
| <i>mtgo</i>    | 25307, <a href="#">mtgo<sup>MB05860</sup></a>               | intron                                                             | 20.292                                                                              | 0.429                                           | 40.156 *** |
| <i>CG32982</i> | NA <sup>3</sup> , <a href="#">CG32982<sup>MB02847</sup></a> | intron                                                             | 16.442                                                                              | -3.421                                          | 36.306     |
| <i>bab1</i>    | 23859, <a href="#">bab1<sup>MB01972</sup></a>               | exon (3'UTR)                                                       | 14.350                                                                              | -5.513                                          | 34.214     |
| <i>Lmpt</i>    | 27795, <a href="#">Lmpt<sup>MB09664</sup></a>               | intron                                                             | 11.841                                                                              | -8.023                                          | 31.704     |
| <i>CG32333</i> | 29190, <a href="#">CG32333<sup>MB11273</sup></a>            | intron                                                             | 11.674                                                                              | -8.190                                          | 31.538     |
| <i>app</i>     | 25532, <a href="#">app<sup>MB06918</sup></a>                | Exon (3'UTR) for J and K transcripts. Intron for other transcripts | 10.716                                                                              | -9.148                                          | 30.580     |
| <i>Cpr66D</i>  | 23423, <a href="#">Cpr66D<sup>MB02183</sup></a>             | intron                                                             | 9.014                                                                               | -10.849                                         | 28.878     |
| <i>dpr6</i>    | 24673, <a href="#">dpr6<sup>MB04096</sup></a>               | intron                                                             | 8.103                                                                               | -11.760                                         | 27.967     |

|                |                                                     |                                                                     |         |         |        |
|----------------|-----------------------------------------------------|---------------------------------------------------------------------|---------|---------|--------|
| <i>Asph</i>    | 29278,<br><a href="#">Asph<sup>MB12115</sup></a>    | Exon<br>(coding)                                                    | 5.157   | -14.706 | 25.021 |
| <i>app</i>     | 24066,<br><a href="#">app<sup>MB03425</sup></a>     | intron                                                              | 0.133   | -19.730 | 19.997 |
| <i>CG15096</i> | 24557,<br><a href="#">CG15096<sup>MB03994</sup></a> | intron                                                              | -6.255  | -26.118 | 13.609 |
| <i>fru</i>     | 24442,<br><a href="#">fru<sup>MB02472</sup></a>     | Exon<br>(3'UTR)<br>for some<br>transcripts,<br>intron for<br>others | -8.316  | -28.179 | 11.548 |
| <i>Hs6st</i>   | 25513,<br><a href="#">Hs6st<sup>MB06545</sup></a>   | intron                                                              | -14.986 | -34.849 | 4.878  |

<sup>1</sup>BDSC=Bloomington Drosophila Stock Center

<sup>2</sup>Comparisons significant at the 0.05 level are indicated by \*\*\*

<sup>3</sup>NA, not applicable as the stock is no longer available from BDSC.
